# Unveiling the Hidden Toll of Drug-Induced Impulsivity:

A Network Analysis of the FDA Adverse Event Reporting System.

**Running Title:** The burden of drug-induced Impulsivity

## Authors:

Michele Fusaroli\*<sup>1</sup> MD 0000-0002-0254-2212 michele.fusaroli2@unibo.it (corresponding author)

Stefano Polizzi\*<sup>2</sup> MPhys, MBiostat, PhD 0000-0002-5264-5156 stefano.polizzi@unibo.it

Luca Menestrina\*<sup>3</sup> MPharm 0000-0002-3397-7737 luca.menestrina2@unibo.it

Valentina Giunchi<sup>1</sup> MStat 0000-0001-5841-8520 valentina.giunchi2@unibo.it

Luca Pellegrini<sup>4,5</sup> MD 0000-0002-2855-2865 luca.pellegrini@nhs.net

Emanuel Raschi<sup>1</sup> MD, PhD 0000-0003-0487-7996 emanuel.raschi@unibo.it

Daniel Weintraub<sup>6,7</sup> MD 0000-0003-0633-7168 Daniel.Weintraub@pennmedicine.upenn.edu

Maurizio Recanatini<sup>3</sup> MChem, PhD 0000-0002-0039-0518 maurizio.recanatini@unibo.it

Gastone Castellani<sup>2</sup> MPhys, MBio, PhD 0000-0003-4892-925X gastone.castellani@unibo.it

Fabrizio De Ponti<sup>1</sup> MD, PhD 0000-0002-0367-9595 fabrizio.deponti@unibo.it

Elisabetta Poluzzi<sup>1</sup> MPharm, PhD 0000-0002-7209-0426 elisabetta.poluzzi@unibo.it

\*Equally contributed

## Affiliations:

<sup>1</sup>Pharmacology Unit, Department of Medical and Surgical Sciences, University of Bologna, Bologna, Italy.

<sup>2</sup>Unit of Medical Physics, Department of Medical and Surgical Sciences, University of Bologna, 40138 Bologna, Italy

<sup>3</sup>Department of Pharmacy and Biotechnology, Alma Mater Studiorum - University of Bologna, Via Belmeloro 6, 40126 Bologna, Italy

<sup>4</sup>Hertfordshire Partnership NHS University Foundation Trust, Highly Specialised OCD and BDD Service, Rosanne House, Parkway, Welwyn Garden City, Hertfordshire, UK

<sup>5</sup>School of Life and Medical Sciences, University of Hertfordshire, Hatfield, Hertfordshire, UK

<sup>6</sup>Perelman School of Medicine at the University of Pennsylvania, Philadelphia, PA

<sup>7</sup>Parkinson's Disease Research, Education and Clinical Center (PADRECC), Philadelphia Veterans Affairs Medical Center, Philadelphia, PA

**Figures:** 7      **Tables:** 2

**Word count:** 4,249

**Fields:** social psychiatry and epidemiology; neuropsychopharmacology

## Abstract

**Introduction:** Adverse drug reactions significantly impact patients' lives, yet their influence is often underestimated in treatment decisions and monitoring. Impulsivity induced by dopaminergic agents can lead to impaired social functioning and quality of life.

**Aim:** This study assesses impulsivity burdens from pramipexole and aripiprazole, pinpointing key symptoms for targeted mitigation.

**Method:** Leveraging data from the FDA Adverse Event Reporting System (January 2004 - March 2022), we employed the Information Component to identify the syndrome of signs and symptoms disproportionately co-reported with drug-induced impulsivity. Using composite network analyses (PPMI, Ising,  $\phi$ ) we characterized clusters of co-reported events (i.e., subsyndromes). Finally, we assessed the secondary impact of drug-induced impulsivity modeling our dataset as a chain of directed connections (Bayesian network).

**Results:** The drug-induced impulsivity syndrome (respectively 56 and 107 events in pramipexole and aripiprazole recipients), primarily encompassed psychiatric, social, and metabolic events, segregated into subsyndromes such as delusional jealousy and dopamine dysregulation syndromes among pramipexole recipients, and obesity-hypoventilation syndrome and social issues among aripiprazole recipients. Anxiety and economic problems emerged as pivotal nodes in the exacerbation of the syndromes.

**Conclusion:** Drug-induced impulsivity places a substantial burden on patients and their families, with manifestations shaped by the underlying disease. Network approaches, exploring intricate symptom connections and identifying pivotal symptoms, complement traditional techniques and clinical judgment, providing a foundation for informed prescription and targeted interventions to alleviate the burden of adverse drug reactions.

**Keywords:** drug-induced impulsivity; adverse drug reactions; quality of life; pramipexole; aripiprazole; impulse control disorders

## 1. Introduction

Adverse drug reactions (ADRs) significantly impact patients' well-being<sup>1</sup> by extending beyond organic diseases and trespassing into psychological illness<sup>2</sup> and social sickness<sup>3</sup>. For instance, immunodeficiency perturbs social activities, dysphonia hinders teaching roles, and sexual dysfunction intricately affects relationships and personal identity. Despite their profound effects, ADRs are often inadequately recognized, resulting in compromised patient-doctor relationships<sup>4</sup>, prolonged hospitalization<sup>5</sup>, and a pervasive decline in Quality of Life (QoL)<sup>6</sup>. This disregard extends to patient-reported outcomes—crucial for QoL assessment and patient-centered care<sup>7</sup>—often relegated to the margins in prescribing information or package inserts<sup>8</sup>.

Drug-induced impulsivity, classified as 'impulse control disorders induced by other specified psychoactive substance (6C4E.73)' in the International Classification of Diseases (ICD-11) category of disorders due to substance use, represents a distressing group of conditions marked by a loss of behavioral control. This pathological disinhibition can yield behaviors as pervasive as pathologic gambling, hypersexuality, compulsive shopping, and hyperphagia—the so-called “four knights of Impulse Control Disorder”<sup>9</sup>. Additionally, behaviors like stealing, hair pulling, and compulsive hoarding<sup>10,11</sup> contribute to the intricate tapestry of drug-induced impulsivity. The first reports of drug-induced impulsivity were linked to dopamine receptor agonists like pramipexole, ropinirole, rotigotine, licensed for treating Parkinson's disease (PD)<sup>12</sup> and restless legs syndrome (RLS)<sup>13,14</sup>. More recently, the role of partial dopamine agonists like aripiprazole, brexpiprazole, cariprazine, licensed for treating psychosis and mood disorders, has also emerged<sup>15</sup>.

Within the landscape of PD, drug-induced impulsivity unfurls a complex narrative. Initially, it may manifest as heightened motivation and hobbyism, known as “honeymoon period”<sup>16</sup>. However, even when concealed in subclinical forms<sup>17</sup>, drug-induced impulsivity holds the potential to significantly erode patients' QoL<sup>18</sup>. This erosion, appraised through metrics like the PDQ-39 scale<sup>19</sup>, encompasses diverse neuropsychiatric and somatic domains including mobility, daily activities, stigma, social support, communication<sup>20</sup>, urinary and sexual function, sleep, attention, and cardiovascular symptoms<sup>21</sup>. The impact extends beyond patients to affect caregivers, who grapple with their own set of health issues, depression, and social impediments<sup>22</sup>.

Nevertheless, conventional evaluations frequently fall short in encompassing neuropsychiatric symptoms, altered behavior patterns, financial hardships, and legal

entanglements<sup>23</sup>, failing to capture the full spectrum of these disorders. This underscores the crucial need for an integrative approach, considering the perspectives of both patients and caregivers and acknowledging the complex interconnections between symptoms<sup>24</sup>.

The US FDA Adverse Event Reporting System (FAERS), a public global repository gathering spontaneous reports on suspected ADRs from patients and healthcare professionals, stands as a powerful data source for this purpose<sup>25</sup>. Remarkably, patients offer unique insights into the experiences and impacts of ADRs on QoL, surpassing the information provided by healthcare professionals<sup>26–30</sup>.

Moreover, network analyses, providing the means to investigate complex systems consisting of multiple interacting entities, present a promising avenue. Specifically, they enable the analysis and visualization of ADRs as interwoven symptoms and signs rather than isolated events<sup>31</sup>—a composite syndrome encompassing psychosocial implications.

Our investigation into the intricacies of drug-induced impulsivity aligns with three overarching goals. The first is to untangle the components of the syndrome of drug-induced impulsivity. Through examining the interplay of symptoms and their consequences, we aim to gain a deeper understanding of how these syndromes manifest and affect patients' lives.

Our second goal is to identify distinct sub-syndromes within the broader spectrum of drug-induced impulsivity, i.e., whether symptoms fall into distinct clusters, with different clinical consequences.

Our third goal is to identify pivotal symptoms that centrally contribute to exacerbating the syndrome of drug-induced impulsivity. By pinpointing these key symptoms, we aim to pave the way for targeted interventions that alleviate the adverse effects on patients' lives.

In pursuing these goals, our study focuses on recipients of pramipexole and aripiprazole, chosen as representative instances: pramipexole, a dopamine agonist used in neurological conditions, and aripiprazole, a dopamine partial agonist employed in psychiatric disorders. Through this focused investigation, we aim to illuminate the complexities of drug-induced impulsivity, exploring how the same ADR might manifest differently in various populations. Specifically, we anticipate that younger and more stigmatized individuals taking aripiprazole may bear a heavier burden compared to older individuals with stronger social support prescribed pramipexole. A better understanding of the impact of these ADRs on quality of life could contribute to informed decision-making for patients and caregivers, laying the foundation for interventions capable of alleviating the toll exacted by impulsivity.

## 2. Materials and Methods

### 2.0 Study Design

The study design (**Figure 1**) involved downloading and cleaning FAERS reports (Step 1), identifying aripiprazole and pramipexole recipients, and selecting cases recording drug-induced impulsivity within these two populations (Step 2). Disproportionality analysis defined the syndrome as events statistically co-reported with drug-induced impulsivity, rather than with other suspected reactions of the same drug (Step 3). Subsequently, three parallel network analyses identified sub-syndromes as clusters of co-reported events (Step 4). Finally, a Bayesian Network (Step 5) provided insights into the potential direction of associations and the secondary impact of drug-induced impulsivity (Step 5).

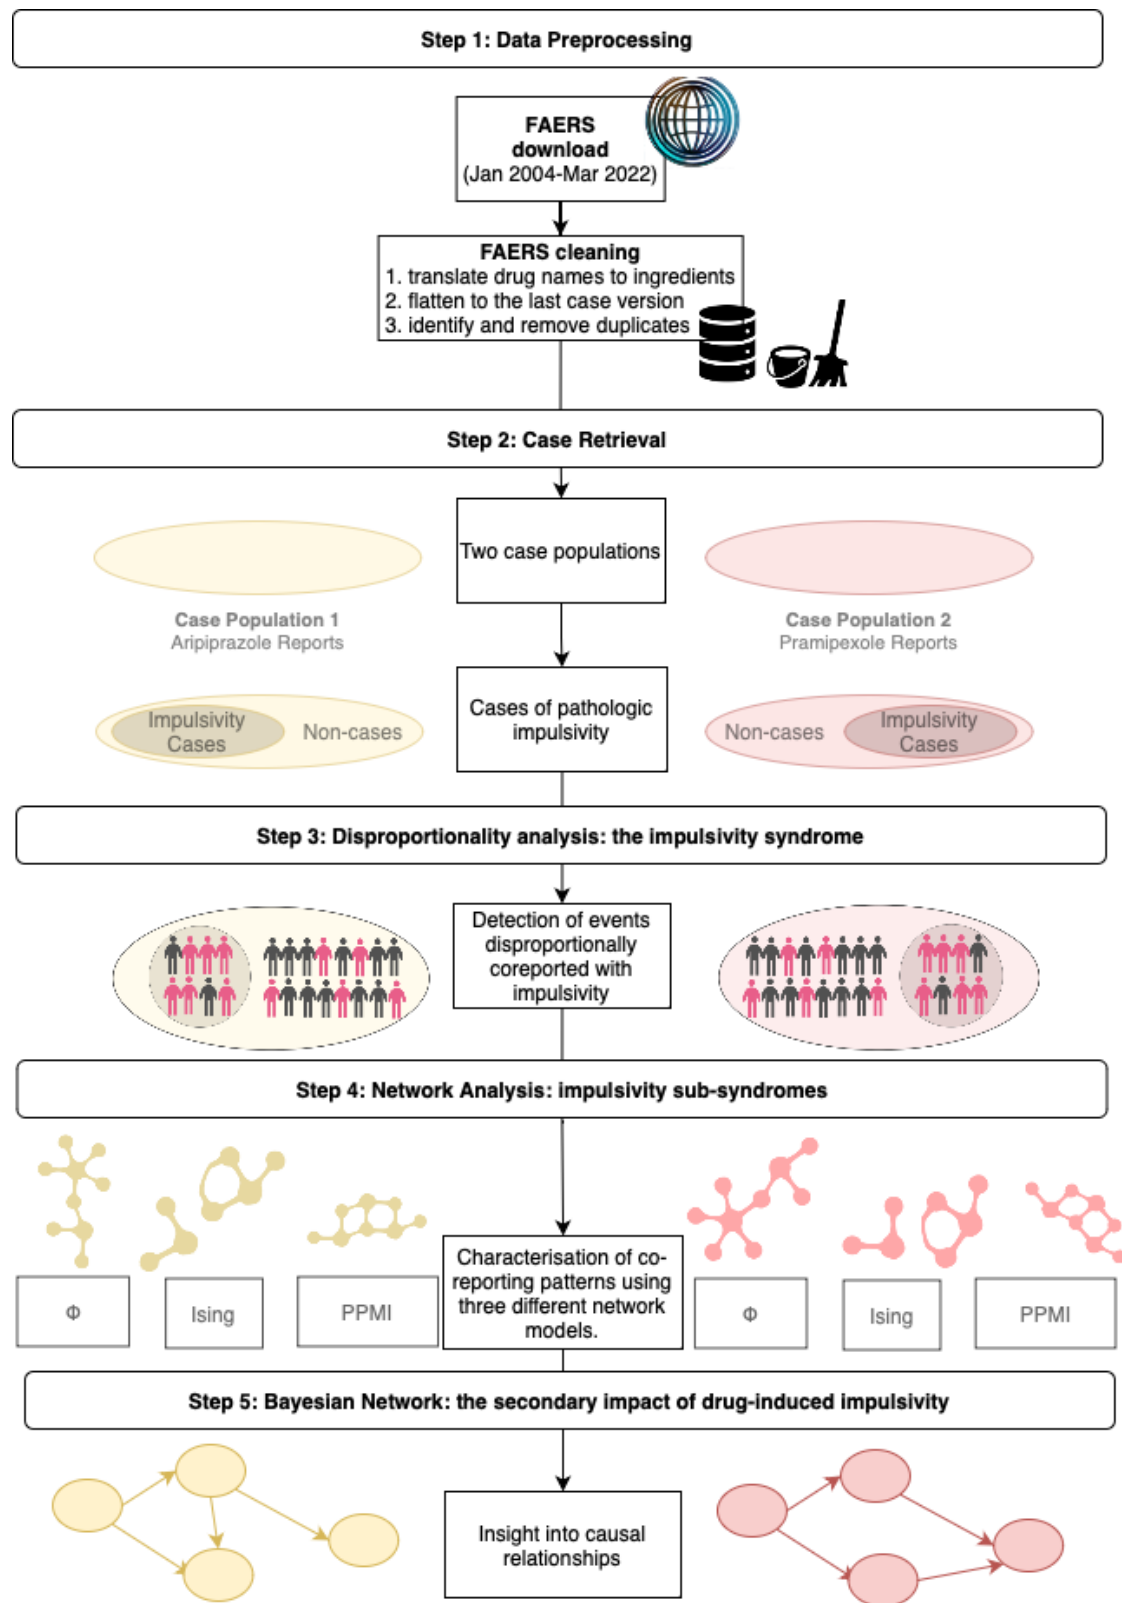

**Figure 1. Pipeline of the study**, showing step-by-step the study design.

## 2.1 Step 1 – Data Preprocessing

We downloaded quarterly FAERS data in ASCII format (January 1<sup>st</sup>, 2004, to March 31<sup>st</sup>, 2022)<sup>32</sup>. Adverse events were coded to the Medical Dictionary for Regulatory Activities (MedDRA®, version 25.0) preferred terms (PTs)<sup>33</sup>, while drugs were standardized to active ingredients<sup>34</sup>. The latest report version was retained, and rule-based deduplication was applied to reduce redundancy (cfr. <https://github.com/fusarolimichele/DiAna>).

## 2.2 Step 2 – Case Retrieval

Analyzing aripiprazole and pramipexole recipients separately, we identified cases as reports recording impulsivity. Following FAERS coding of events to MedDRA, we employed PTs that were specifically curated for investigating drug-induced impulsivity within the FAERS database<sup>10</sup>. These PTs encompassed a range of manifestations, including gambling, hypersexuality, compulsive shopping, hyperphagia, gaming, setting fires, stealing, hoarding, excessive exercise, overwork, compulsive wandering, body-focused repetitive behaviors, stereotypy, and impulsivity (see **Table S1**). A cautious approach is imperative during interpretation, as MedDRA terms used for reporting suspected ADRs may not align directly with terms in other frameworks like the Diagnostic and Statistical Manual of mental disorders (DSM-5-TR) and ICD-11, which may refer to idiopathic conditions.

To explore potential risk factors for impulsivity, demographic characteristics, outcomes, and reporter contributions (e.g., healthcare practitioners, patients, lawyers) were compared between cases and non-cases within each population, using the Chi-square test for categorical and Mann-Whitney test for continuous variables. To address multiple testing, we applied the Holm-Bonferroni correction with a significance level of 0.05.

## 2.3 Step 3 – Disproportionality Analysis: The drug-induced impulsivity syndrome

We conducted a disproportionality analysis to identify events frequently co-reported with drug-induced impulsivity, separately for aripiprazole and pramipexole recipients (see **Table 1**).

**Table 1. 2-way contingency table.** The table shows the different instances that can be observed when considering pathologic impulsivity and a specific event. Legend: E = event; I = impulsivity; 1 = presence; 0 = lack; N = total

|                 | Event (y)     | Other events  | Sum       |
|-----------------|---------------|---------------|-----------|
| Impulsivity (x) | $n_{I_1 E_1}$ | $n_{I_1 E_0}$ | $n_{I_1}$ |
| Other event     | $n_{I_0 E_1}$ | $n_{I_0 E_0}$ | $n_{I_0}$ |
| Sum             | $n_{E_1}$     | $n_{E_0}$     | N         |

Disproportionate reporting was assessed using the Information Component (IC)<sup>35</sup>, also known as pointwise mutual information (PMI) in information theory<sup>36,37</sup>. The IC compares the actual co-reporting of two events  $x$  (i.e., drug-induced impulsivity) and  $y$  (i.e., any specific event) with their expected co-reporting if their probability were independent<sup>36</sup>. To mitigate the risk of false positives for infrequent events<sup>38</sup>, a shrinkage or smoothing approach was applied by adding  $k=0.5$  to both the numerator and denominator. Significance was determined using  $IC_{0.025} > 0$  ( $p(y, x) > p(x) * p(y)$ ).

$$IC(x, y) = PMI(x, y) = \log_2 \frac{p(y, x)}{p(x)p(y)} = \log_2 \frac{n_{I_1 E_1} * N}{n_{I_1} * n_{E_1}} \approx \log_2 \frac{n_{I_1 E_1} + 0.5}{\frac{n_{I_1} * n_{E_1}}{N} + 0.5}$$

$$IC(x, y)_{0.025} = IC - 3.3 * (n_{I_1 E_1} + 0.5)^{-\frac{1}{2}} - 2 * (n_{I_1 E_1} + 0.5)^{-\frac{3}{2}}$$

$$IC(x, y)_{0.975} = IC + 2.4 * (n_{I_1 E_1} + 0.5)^{-\frac{1}{2}} - 0.5 * (n_{I_1 E_1} + 0.5)^{-\frac{3}{2}}$$

## 2.4 Step 4 – Network Analysis: sub-syndromes

Building on insights from prior studies on drugs<sup>39</sup> and events<sup>31,40,41</sup> co-occurrence, our network analysis aimed to unveil sub-syndromes. Using three established network estimations as distinct mathematical representations (PPMI, Ising,  $\phi$ ) and excluding negative links (i.e., potential mutually exclusive events), we explored co-reporting patterns.

The positive pointwise mutual information (PPMI) focused on cases where events were reported together (the  $n_{11}$  case), applying additive smoothing ( $k=1$ ,  $d=N^\circ$  events<sup>42</sup>). Bootstrap and Bonferroni adjustments assessed statistical significance, with a 0.01 threshold.

$$PPMI_{x,y} = \max \left( \log_2 \frac{(n_{11} + k) \times (N + kd)}{(n_{1*} + k) \times (n_{*1} + k)}, 0 \right)$$

The Ising model computed partial logistic regression coefficients ( $\beta$ ) considering the impact of all other events<sup>43</sup>. Positive coefficients indicated a tendency for two events to be reported together. A LASSO method pruned out weak links, eliminating spurious associations but potentially sacrificing weaker genuine relationships<sup>44</sup>.

$$Ising_{x,y} = \max \left( \frac{1}{2} \beta_{x,y} \beta_{y,x}, 0 \right)$$

The  $\phi$  coefficient<sup>45</sup>, akin to the traditional correlation coefficient, approaches one when two events are frequently reported together and converges to zero if they are either independent or mutually exclusive. The Bonferroni adjustment was applied with a significance threshold of 0.01. The p-value was computed using a  $\chi^2$  probability distribution with one degree of freedom<sup>45</sup>.



$$\phi_{x,y} = \max\left(\frac{n_{11}n_{00} - n_{10}n_{01}}{\sqrt{n_{1*}n_{0*}n_{*1}n_{*0}}}, 0\right)$$

For each population, the three networks shared identical nodes but varied in links. We used modularity maximization<sup>46</sup> and the greedy modularity algorithm<sup>47</sup> to detect clusters of co-reported signs and symptoms. Between networks we compared degree of link overlap (Jaccard similarity index<sup>48</sup>), goodness of partitioning (clustering modularity); cluster agreement (Purity index<sup>49-51</sup>), link density (ratio of actual links to possible links), and interconnectedness among neighbors (small worldness<sup>52</sup>).

## 2.5 Step 5 – Bayesian Network: The secondary impact of drug-induced impulsivity

To uncover potential ramifications following drug-induced impulsivity, we estimated the conditional probabilities of chained events. The resulting Bayesian network is both directed, offering insights into plausible causal relationships, and acyclic, ensuring that any chain originating from a node does not loop back to itself. The network was derived through 1000 bootstraps, optimizing the BIC score with the Hill-Climbing algorithm. We computed the average network retaining links exceeding a threshold computed via  $L_1$  minimization. Evaluation focused on nodes with the highest out-degree centrality and the main manifestations of drug-induced impulsivity.

## 3. Results

### 3.1 Case Retrieval

After preprocessing FAERS quarterly data, we retrieved 12,030,756 distinct reports: 27,601 pramipexole recipients and 80,238 aripiprazole recipients. Suspected drug-induced impulsivity was documented in 7.49% of pramipexole recipients (n=2,066: mainly gambling disorder–n=1,345; 4.87%–, hypersexuality–612; 2.22%–, impulsivity–453; 1.64%–, compulsive shopping–384; 1.39%–, and hyperphagia–334; 1.21%–) and in 4.50% aripiprazole recipients (n=3,609: mainly gambling disorder–n=2,067; 2.58%–, hypersexuality–1,077; 1.34%–, compulsive shopping–1,029; 1.28%–, hyperphagia–868; 1.08%–, and impulsivity–730; 0.91%–) (see **Table S2**).

Among pramipexole recipients, drug-induced impulsivity was more frequently reported in males (57.42% vs. 36.99%,  $p<0.001$ ), with lower median age (56 vs. 67,  $p<0.001$ ), often non-serious outcomes (i.e., no death, disability, or hospitalization; 44.87% vs. 33.58%,  $p<0.001$ ), and PD as indication (see **Figure 2** and **Table S3**). Similarly, among aripiprazole recipients, drug-induced impulsivity was more common in males (48.59% vs.

40.72%,  $p < 0.001$ ), but with hospitalization more common (33.39% vs. 23.39%,  $p < 0.001$ ), and an important portion of reports submitted by lawyers (34.08% vs. 1.10%,  $p < 0.001$ ) (see Table S4).

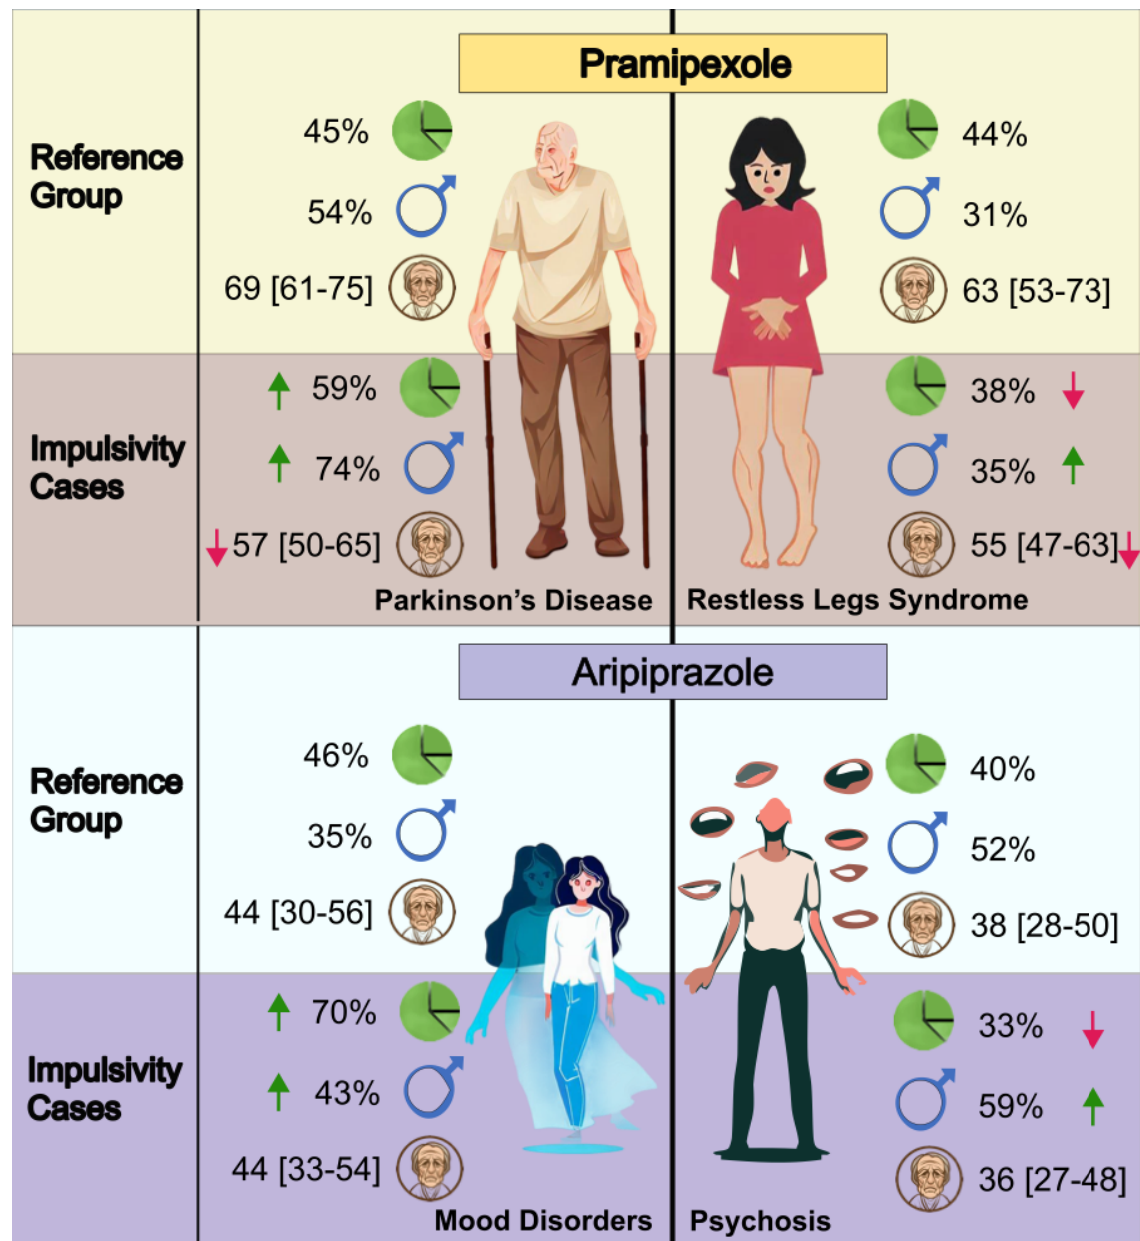

**Figure 2 – Characteristics of the investigated populations.** The figure presents information about two populations extracted from the deduplicated FAERS database - one consisting of reports related to pramipexole and the other consisting of reports related to aripiprazole. Within these populations, cases of pathologic impulsivity were identified. The figure compares drug-induced impulsivity cases and the reference group (other reports recording the drug), considering the indication for use. Only the two most prevalent indications were taken into account. For each drug and indication, the caption describes the percentage of reports with the specified indication, the percent of reports involving males, and the median and interquartile range of ages. In the drug-induced impulsivity cases sections, green and red arrows indicate variables that are respectively higher or lower than expected based on the reference group.

233

### 234 3.2 Disproportionality Analysis: the drug-induced impulsivity syndrome

235 A total of 56 events were disproportionally reported with pramipexole-related  
 236 impulsivity. The highest IC was found for obsessive-compulsive disorder (OCD, reporting  
 237 rate = 26.77%; IC median = 3.47, 95%CI = 3.33-3.57), emotional distress (21.35%; 3.42,  
 238 3.26-3.54), marital problem (1.11%; 3.30, 2.61-3.79), dependence (2.37%; 3.26, 2.79-3.6),  
 239 economic problems (6.05%; 3.15, 2.85-3.36), compulsions (1.74%; 3.05, 2.49-3.44), fear  
 240 (4.65%; 2.95, 2.61-3.19), eating disorder (2.47%; 2.95, 2.49-3.28), personality change  
 241 (2.66%; 2.93, 2.49-3.26), and suicide attempt (5.28%; 2.74, 2.43-2.97).

242 A total of 107 events were disproportionally reported with aripiprazole-related  
 243 impulsivity. The highest IC was found for bankruptcy (10.58%; 4.43, 4.26-4.55), divorce  
 244 (7.59%; 4.38, 4.19-4.53), homeless (6.93%; 4.37, 4.16-4.52), shoplifting (5.02%; 4.37, 4.12-  
 245 4.54), neuropsychiatric symptoms (4.74%; 4.35, 4.1-4.53), loss of employment (12.64%;  
 246 4.33, 4.18-4.44), theft (5.79%; 4.32, 4.09-4.48), economic problems (37.85%; 4.28, 4.19-  
 247 4.34), sexually transmitted disease (3.05%; 4.24, 3.93-4.47), and OCD (33.19%; 4.16, 4.07-  
 248 4.23) (see **Figure 3 and Table S5 and S6**).

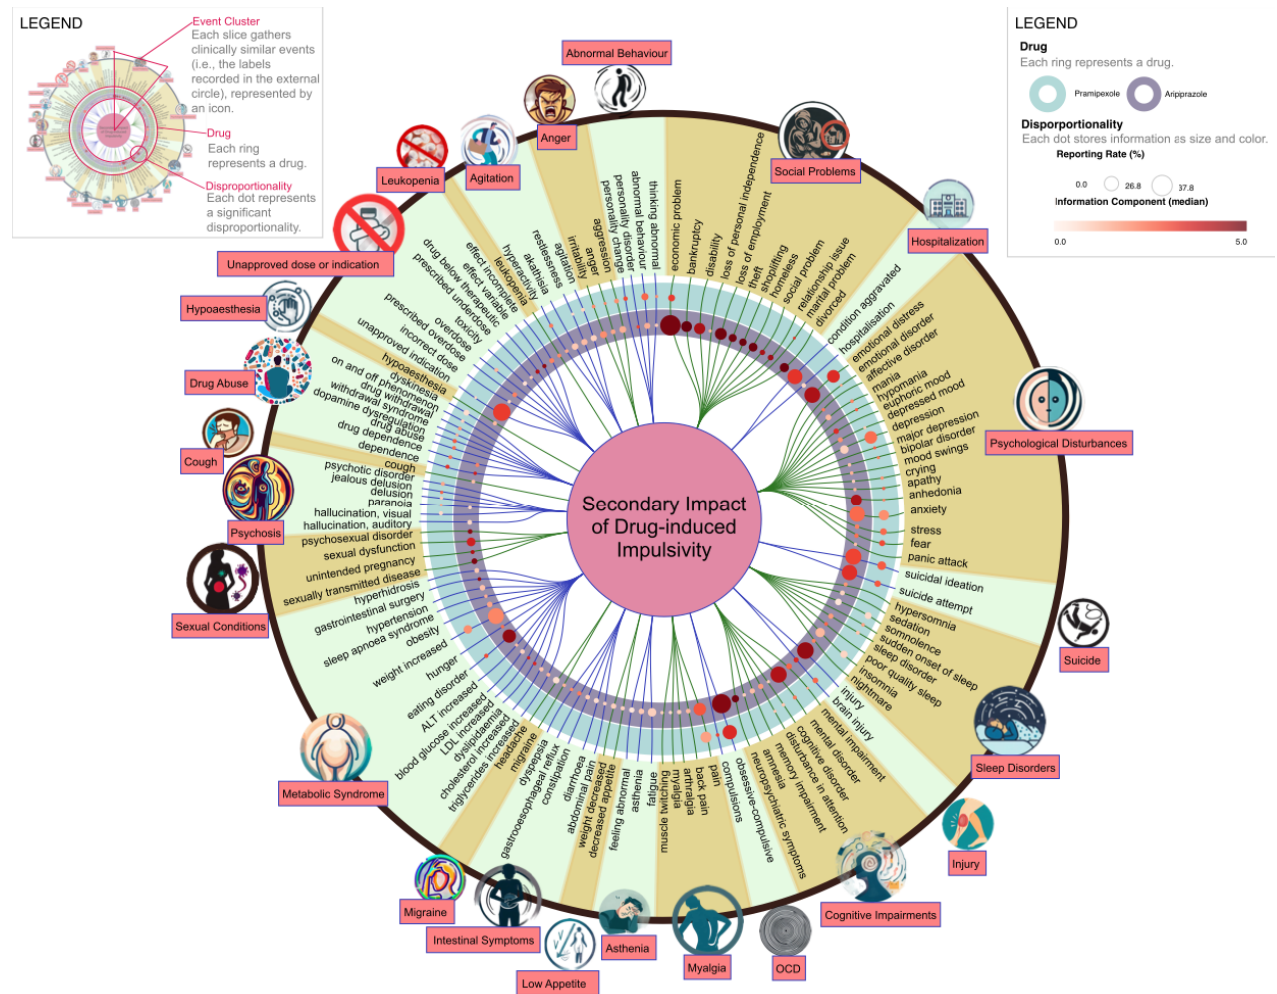

**Figure 3 – Secondary impact of drug-induced impulsivity.** The dendrogram shows the events disproportionally reported with aripiprazole and pramipexole-related impulsivity. Events are gathered by clinical similarity in alternately colored slices, labeled on the outer border with a name and an icon. Disproportionalities are shown as dots organized in two colored rings, each representing a drug/case population. The dots' size is proportional to the percent of reports showing the event, the color is darker for stronger disproportionality (higher median Information Component).

### 3.3 Network Analysis: sub-syndromes

In the second step we estimated the networks using three different approaches and identifying clusters of events. We included a total of 120 nodes (107 events disproportionally reported with impulsivity + 13 impulsivity-related terms) and 70 nodes (56 + 14) for the aripiprazole and pramipexole network, respectively. Although the nodes remained constant, edges, clusters, and network properties were different (Table 2-S7-S10-S11). The most central nodes (degree centrality) were the ones with the highest occurrence in Ising and the lowest occurrence in PPMI. The Jaccard similarity was higher for Ising-, while for -PPMI half of the links were different. The clustering was more overlapping between -PPMI, followed by

$\phi$ -Ising and PPMI-Ising, as captured by the purity index.  $\phi$  and PPMI tended to group together multiple Ising clusters (Figures S11-S16).

**Table 2. Network properties.** The table shows the network properties for the three networks estimated for aripiprazole and pramipexole, respectively, and for their comparison. Legend: (–) means that there is also a strong link between the first and last element.

| <b>Aripiprazole (120 nodes)</b>                                                             |                                                                                                               |                                                                                        |                                                        |
|---------------------------------------------------------------------------------------------|---------------------------------------------------------------------------------------------------------------|----------------------------------------------------------------------------------------|--------------------------------------------------------|
| gambling disorder (N=2057), economic problems (1366), obsessive-compulsive disorders (1198) |                                                                                                               |                                                                                        |                                                        |
|                                                                                             | <b>Ising</b>                                                                                                  | $\phi$                                                                                 | <b>PPMI</b>                                            |
| <b>Links</b>                                                                                | 301                                                                                                           | 1186                                                                                   | 1254                                                   |
| <b>Central node</b> (1°)                                                                    | economic problems                                                                                             | Irritability                                                                           | overwork                                               |
| <b>Heaviest links</b> (1-3°)                                                                | AP below therapeutic – effect variable – effect incomplete<br>Theft–shoplifting                               | (–)AP below therapeutic– effect variable–toxicity(–)                                   | Kleptomania–overwork– pyromania<br>Overwork–poriomania |
| <b>Clusters</b> (N)                                                                         | 10                                                                                                            | 5                                                                                      | 4                                                      |
| <b>Clustering modularity</b>                                                                | 0.71                                                                                                          | 0.59                                                                                   | 0.46                                                   |
| <b>Small worldness</b> ( $\omega$ )                                                         | 0.26                                                                                                          | 0.04                                                                                   | 0.03                                                   |
|                                                                                             | $\phi$ -Ising                                                                                                 | $\phi$ -PPMI                                                                           | PPMI-Ising                                             |
| <b>Jaccard</b> (out of max) <sup>†</sup>                                                    | 0.25 (0.25)                                                                                                   | 0.56 (0.95)                                                                            | 0.21 (0.24)                                            |
| <b>Purity index</b> <sup>‡</sup>                                                            | 0.68                                                                                                          | 0.89                                                                                   | 0.59                                                   |
| <b>Pramipexole (70 nodes)</b>                                                               |                                                                                                               |                                                                                        |                                                        |
| gambling disorder (N=1340), obsessive-compulsive disorders (553), and hypersexuality (543)  |                                                                                                               |                                                                                        |                                                        |
|                                                                                             | <b>Ising</b>                                                                                                  | $\phi$                                                                                 | <b>PPMI</b>                                            |
| <b>Links</b> (density %)                                                                    | 85                                                                                                            | 240                                                                                    | 576                                                    |
| <b>Central node</b> (1°)                                                                    | gambling disorder                                                                                             | mental disorder                                                                        | pyromania                                              |
| <b>Heaviest links</b> (1-3°)                                                                | body-focused disorders– kleptomania<br>mental impairment–mental disorder<br>on and off phenomenon– dyskinesia | Pain–emotional distress– obsessive-compulsive disorder<br>Hyperphagia–weight increased | (–)Poriomania–pyromania– gaming disorder(–)            |
| <b>Clusters</b> (N)                                                                         | 10                                                                                                            | 6                                                                                      | 4                                                      |
| <b>Clustering modularity</b>                                                                | 0.66                                                                                                          | 0.51                                                                                   | 0.15                                                   |
| <b>Small worldness</b> ( $\omega$ ) §                                                       | -0.01                                                                                                         | 0.29                                                                                   | 0.47                                                   |
|                                                                                             | $\phi$ -Ising                                                                                                 | $\phi$ -PPMI                                                                           | PPMI-Ising                                             |
| <b>Jaccard</b> (out of max)                                                                 | 0.34 (0.35)                                                                                                   | 0.23 (0.42)                                                                            | 0.12 (0.15)                                            |
| <b>Purity index</b>                                                                         | 0.44                                                                                                          | 0.66                                                                                   | 0.39                                                   |

<sup>†</sup>  $J(A, B) = \frac{|A \cap B|}{|A \cup B|}$ .

<sup>‡</sup>  $Purity = \frac{1}{N} \sum_{k=1}^{K_{min}} \max_{\pi} n_{k,\pi}$ , with  $K_{min}$  the minimum clusters and  $\max_{\pi} n_{k,\pi}$  the maximum elements.

§ a small world has  $\omega = \frac{L_r}{L} - \frac{C}{C_l} \approx 0$ : the shortest path length  $L$  is similar to that of an equivalent random

network  $r$  and the clustering coefficient  $C$  is similar to that of an equivalent lattice network  $l$ .

For both drugs, the central clusters included cognitive disorders (e.g., cognitive impairment, memory impairment), bipolar disorder, and depression. Among aripiprazole recipients (**Figure 4**), the prominent cluster also includes stress and its psychophysical manifestations (irritability, headache, sleep disorders, decreased appetite, weight loss, constipation, and myalgia), together with panic attack and auditory hallucinations. Another stress-related sub-



syndrome included migraine, nightmares, back and abdominal pain, arthralgia, reflux, diarrhoea, and hyperhidrosis. Gambling and shopping were strictly related to social issues (hoarding, unemployment, homeless, bankruptcy, divorce, theft), suicide attempts, and through hypersexuality with unintended pregnancy and sexually transmitted diseases. Hyperphagia was co-reported with obesity, sleep apnoea syndrome, sedation, amnesia, and hypertension. Blood alterations, such as increased lipids, transaminases, and glucose in the blood, were reported together.

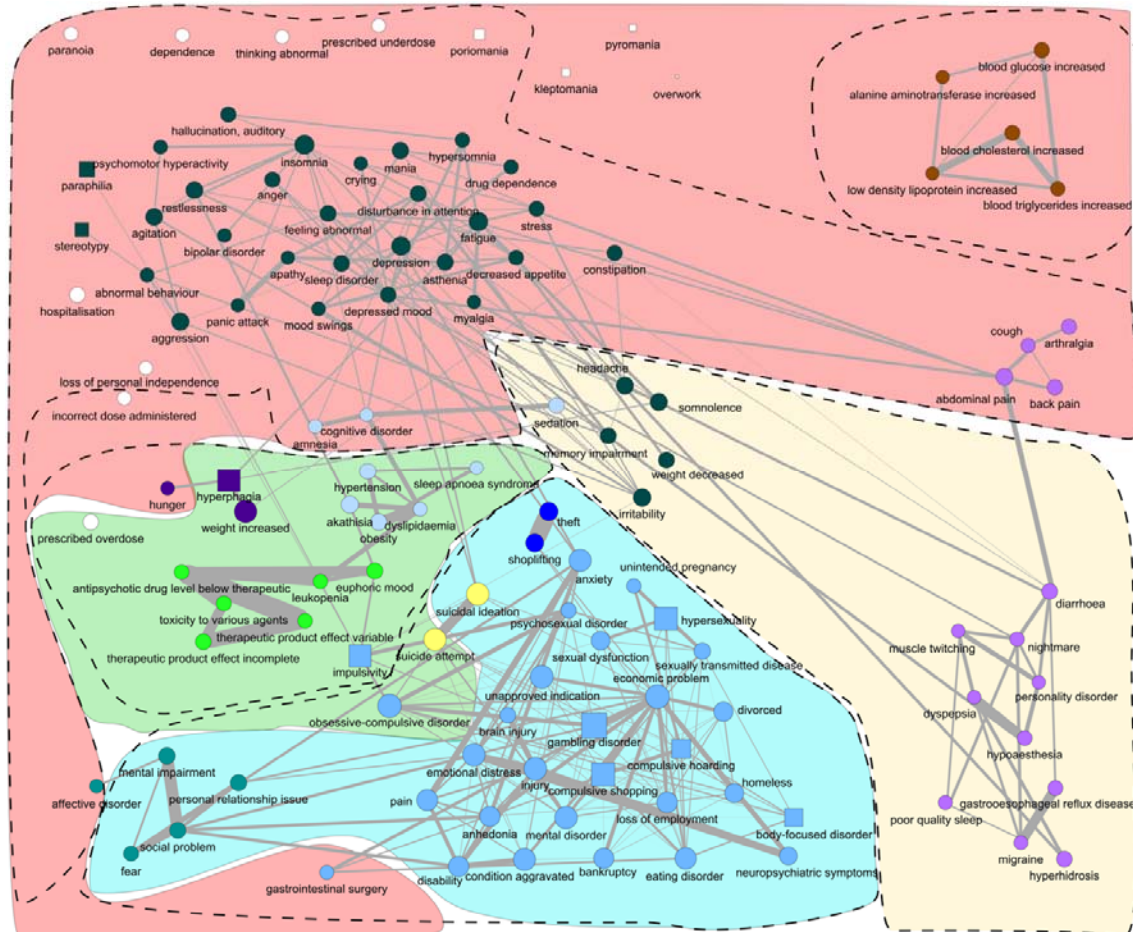

**Figure 4. The secondary impact of aripiprazole-induced impulsivity.** The network shows the events disproportionally reported with aripiprazole-related impulsivity and their pattern of co-reporting. Drug-induced impulsivity manifestations are shown as squares and other events as circles. Node colors identify clusters from the Ising estimation, dashed contours for the estimation, and colored contours for the PPMI estimation. The link width represents the weight of the links of the Ising, here chosen over the others because they are fewer and more conservative. The layout has been manually adjusted to reduce the overlapping. The layout calculated using a spring model with, as weight, the weights from the individual networks and the average of the weights of the three networks, after rescaling them from 0 to 1, is shown in the supplementary material.

Among pramipexole recipients (**Figure 5**), the prominent cluster also includes apathy, delusion, and economic problems. A sub-syndrome included terms related to dopamine

dysregulation syndrome (a manifestation of pathological impulsivity marked by excessive levodopa use<sup>53</sup>, which can be co-administered with dopamine agonists to better control motor symptoms), such as drug dependence and withdrawal, and on and off phenomenon. Hallucinations, irritability, and crying were reported with delusional jealousy, hypersexuality, and marital problems. Hyperphagia was associated with weight increase, somnolence, insomnia, and disturbance in attention. Fear, anxiety, pain, stress, and depression were associated with suicide attempts. Finally, body-focused repetitive behaviors and stealing behaviors showed strong co-reporting.

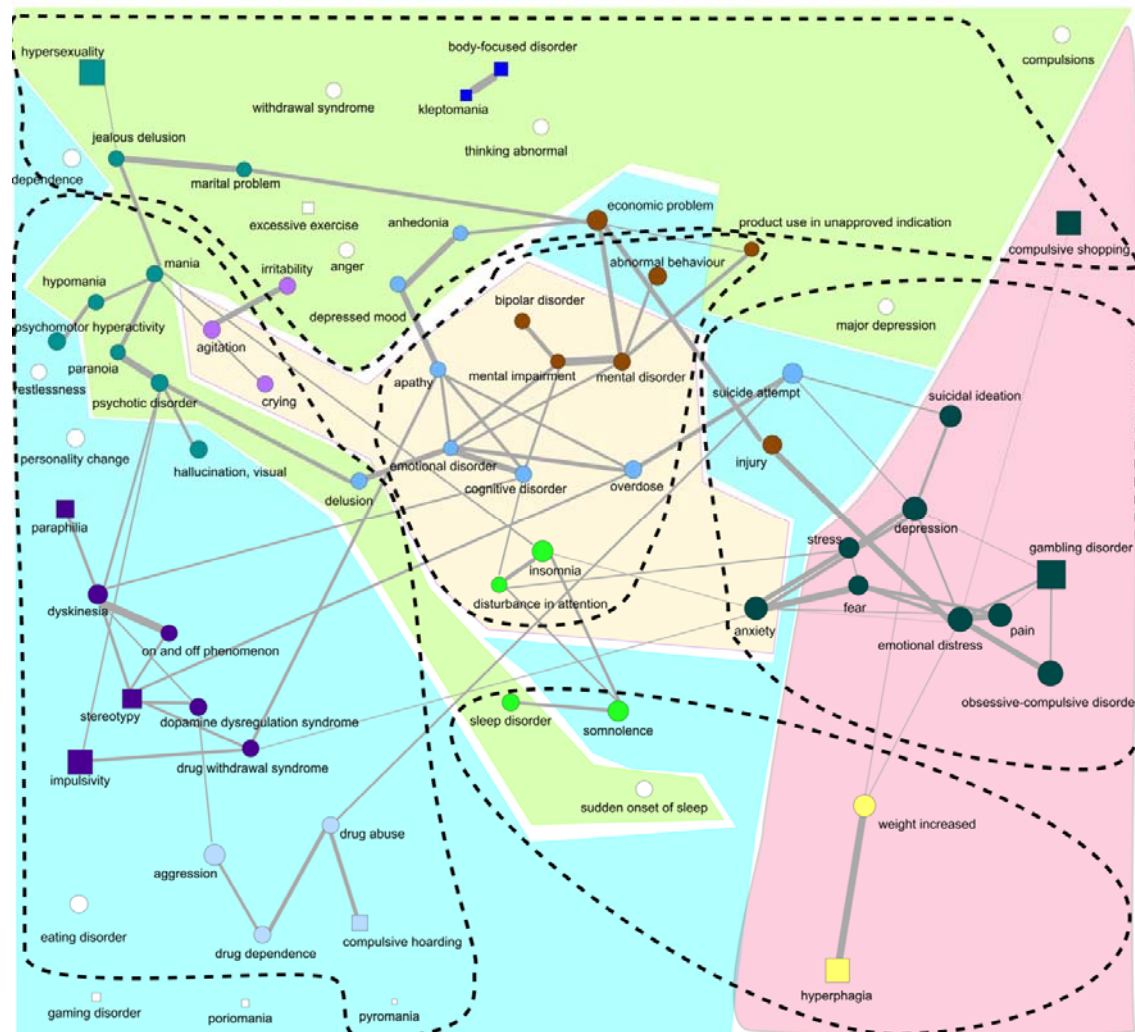

**Figure 5. The secondary impact of pramipexole-induced impulsivity.** The network shows the events disproportionately reported with pramipexole-related impulsivity and their pattern of co-reporting. Drug-induced impulsivity manifestations are shown as squares and other events as circles. Node colors identify clusters from the Ising estimation, dashed contours for the PPMI estimation, and colored contours for the Ising estimation. The link width represents the weight of the links of the Ising, here chosen over the others because they are fewer and more conservative. The layout has been manually adjusted to reduce the overlapping. The layout calculated using a spring model with, as weight, the weights from the individual networks and the average of the weights of the three networks, after rescaling them from 0 to 1, is shown in the supplementary material.

315

### 316 3.4 Bayesian Network: The secondary impact of drug-induced impulsivity

317 The Bayesian Network yielded insights into the directional associations between co-reported  
318 events (see **Figure 6** and OSF repository<sup>54</sup>).

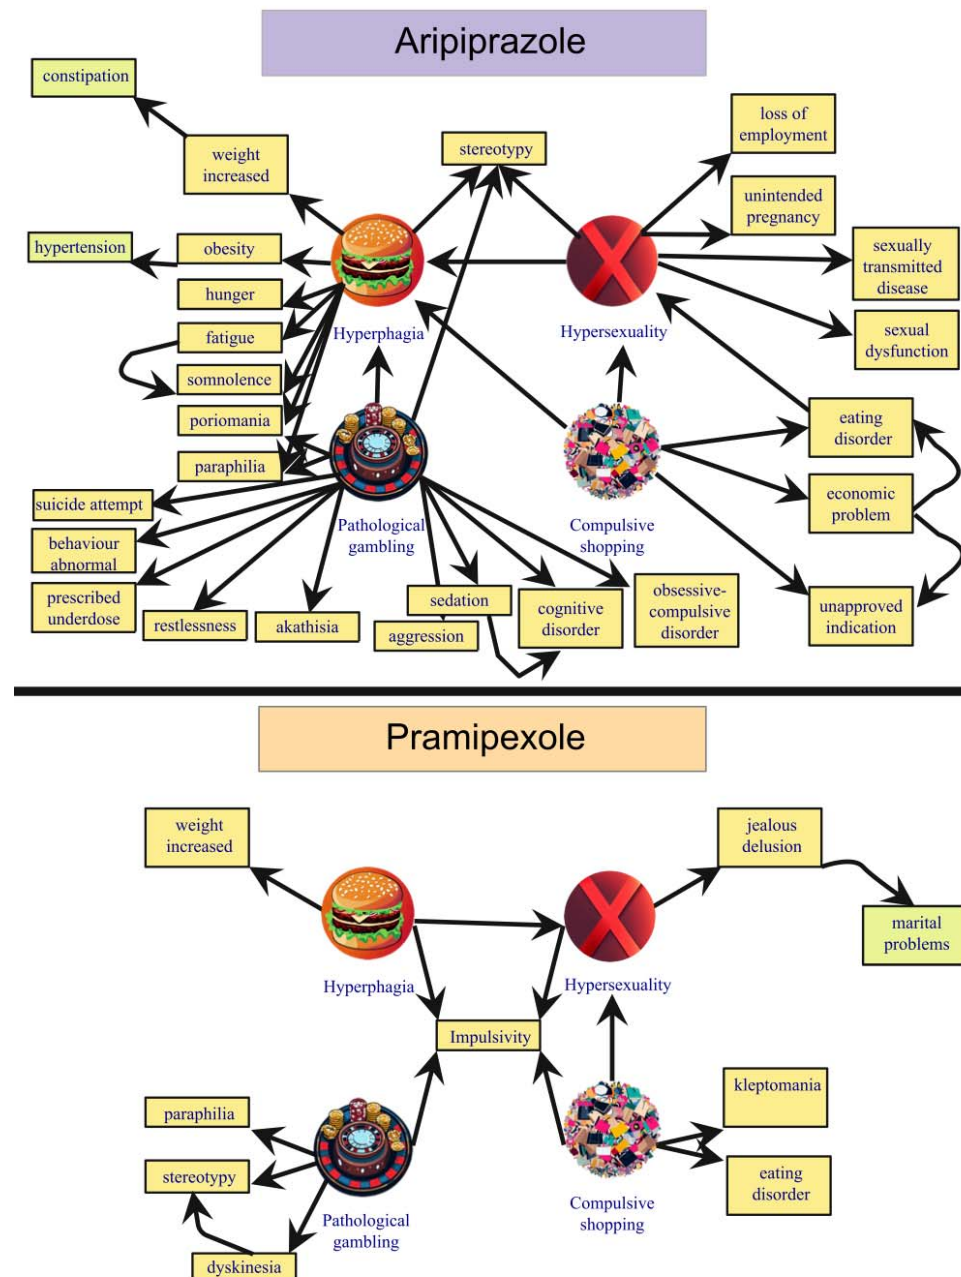

319

320 **Figure 6. The secondary impact of the main drug-induced impulsivity, aripiprazole and pramipexole.** The ego-networks extracted  
321 from the Bayesian Network show the potential direction of the co-reporting relationships between the events, thus providing insight into the  
322 direct and indirect impact of drug-induced impulsivity. Nodes linked to hyperphagia, hypersexuality, pathological gambling, and compulsive  
323 shopping are represented. Only out-neighbors of order equal or less than 1 are shown here, together with out-neighbors of order 2 considered  
324 relevant for clinical interpretation.



High out-degree centrality identified pivotal events that likely heightened the likelihood of reporting other events (Figure S9-S10). Since this directed network only generates hypotheses, we preferred temporal terminology (i.e., preceding and following) to causal terminology even if no temporality was taken into account.

In pramipexole recipients, anxiety (3.55), emotional distress (2.92), and gambling (2.30) attained the highest out-degree centrality. Anxiety preceded insomnia (with irritability, somnolence, and attention disturbances), stress and depression (with suicide), fear, OCD, and emotional distress. Emotional distress preceded pain and injury (with major depression and economic problems), abnormal thinking and behavior, weight gain, and pathologic gambling. Furthermore, hypersexuality preceded delusional jealousy and marital difficulties, compulsive shopping stealing behaviors, and hyperphagia weight increase.

In aripiprazole recipients, economic problems (5.97), gambling (4.15), and hyperphagia (2.33) attained the highest out-degree centrality. Economic problems preceded theft, hoarding, divorce, loss of employment, homelessness, suicide, sex dysfunction, sexually transmitted diseases, and eating disorder. Gambling preceded aggressivity, suicide, cognitive disorders, hyperphagia, and paraphilia. Hyperphagia preceded somnolence and fatigue (with stress, attention disturbances, myalgia, cough), hunger, weight increase (with constipation), obesity (with hypertension), compulsive wandering, and paraphilic disorders. Anxiety preceded depression (with sleep disorders and suicide), fear and panic attacks (with relationship issues), pain and injury (with emotional distress, disability, anhedonia, and economic problems). Furthermore, hypersexuality preceded sexual dysfunction, sexually transmitted diseases, unintended pregnancy, and loss of employment, compulsive shopping eating disorders and economic problems.

## 4. Discussion

### 4.1 Summary and Key Results

Patients and caregivers should be informed about the potential impact of drugs inducing impulsivity on their QoL. Investigating aripiprazole and pramipexole, we captured the main clinical scenarios at risk of drug-induced impulsivity. Disproportionality analysis revealed features of the impulsivity syndrome for each scenario, encompassing mainly psychosocial events but also organic conditions. Network analysis identified sub-syndromes such as delusional jealousy (also known as Othello syndrome<sup>55</sup>) and dopamine dysregulation

syndrome (i.e., the excessive use of levodopa) in pramipexole recipients, and obesity-hypoventilation syndrome (historically Pickwickian syndrome) and social issues in aripiprazole recipients. The Bayesian Network highlighted directional associations, potentially suggesting secondary consequences of drug-induced impulsivity. Anxiety and economic problems emerged as pivotal events that could be potentially targeted to disrupt the chain of events and alleviate the burden of drug-induced impulsivity: for instance, monitoring and effectively managing anxiety or providing financial guidance or legal guardianship to prevent wasteful spending. Since marital problems affect caregivers' QoL and increase the risk of early placement in nursing homes<sup>22</sup>, addressing delusional jealousy and economic problems, identified as factors preceding marital problems, may be critical for preserving wellbeing in pramipexole recipients.

While aripiprazole and pramipexole offer clear benefits, the substantial impact on patients' and caregivers' QoL should be acknowledged and considered in the monitoring and management of dopamine agonist therapies.

#### 4.2 Case Retrieval

Our findings align with established risk factors, including male gender and younger age<sup>56,57</sup>, Parkinson's Disease (PD)<sup>58,59</sup> and depression<sup>60</sup>. Commonly reported impulsivity manifestations included the "four knights"<sup>9</sup> (i.e., gambling, shopping, hyperphagia, and hypersexuality), garnering special attention due to their pronounced impact on QoL. Other manifestations were body-focused repetitive behaviors, paraphilic disorders, and hoarding.

#### 4.3 Disproportionality analysis: the drug-induced impulsivity syndrome

Pramipexole and aripiprazole recipients differ significantly. Pramipexole is primarily administered to older patients with hypodopaminergic conditions, characterized by motor impairment and reduced motivational drive. These patients, well managed and supported by caregivers because of the later onset and clear neurologic origin of the disease may experience a mitigated drug-induced impulsivity burden. Conversely, aripiprazole is prescribed to younger patients with mood and psychotic disorders, often linked to hyperdopaminergic states and a pre-existing diathesis for impulsivity. Challenges for caregivers and social support are heightened in these cases due to earlier onset, psychiatric origins, and stigma, potentially leading to a greater burden. Over a third of aripiprazole cases were submitted by lawyers, suggesting potential overreporting for legal compensation (cfr., Abilify lawsuit)<sup>61</sup>, but also a response to underdiagnosis by physicians hesitant to attribute behavioral changes to the drug in the presence of underlying psychiatric conditions. Intriguingly, an ascertainment bias may also arise because neurologists prescribing

pramipexole may be less attuned to psychiatric issues than psychiatrists prescribing aripiprazole, further underscoring the contrast in the reported impact on QoL for these two drugs.

By performing the disproportionality analysis on each drug population, comparing reports involving impulsivity with those encompassing various reactions other than impulsivity, we addressed indication bias and other confounding factors. This comparative analysis served as a rigorous filter, allowing us to sift through the complex data and unveil the genuine characteristics associated with impulsivity, as well as those arising from the dynamic interaction between impulsivity and the underlying drug or disease, excluding traits tied solely to the underlying drug or disease.

This approach revealed a complex syndrome, characterized by psychosocial, cognitive, psychosomatic, and metabolic events. The burden of drug-induced impulsivity appears more pronounced in aripiprazole recipients, with functional (or psychosomatic) manifestations and social issues impacting work, relationships, and economics.

#### 4.4 Network Analysis: sub-syndromes

Network analysis, employing three estimation methods, revealed potential subsyndromes associated with specific impulsivity expressions in the two populations (**Figure 7**). The Ising delineated well-defined clusters, while PPMI and  $\phi$  emphasized inter-clusters relationships.

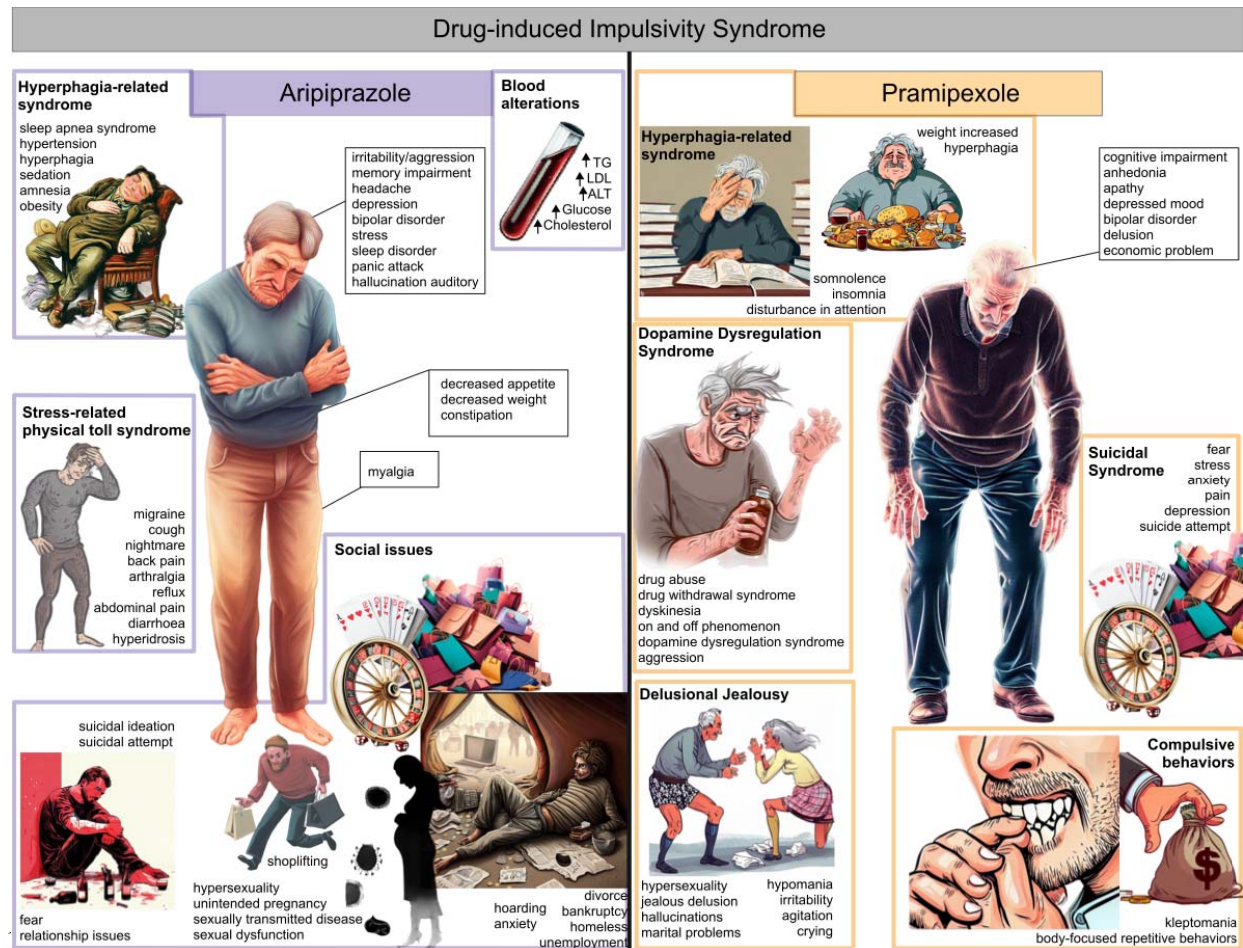

**Figure 7. Drug-induced impulsivity syndrome, aripiprazole and pramipexole.** The main syndrome, representing one or more strongly interconnected central clusters of symptoms and signs identified through network analysis, is depicted as the central figure. Other potential sub-syndromes are shown on the sides highlighted with a colored square.

In both populations, cognitive and mood disorders, significant in their association with drug-induced impulsivity and contribution to disability development<sup>62</sup> played central role. Obesity-hypoventilation syndrome<sup>63</sup>, involving weight gain, cognitive and sleep disorders, and sedation, was consistent in both populations, but seemingly heavier in aripiprazole recipients (also reporting obesity, sleep apnoea syndrome, hypertension, and metabolic blood alterations, highlighting the link between hyperphagia and diabetes onset<sup>64</sup>).

For aripiprazole recipients, the prominent cluster included sleep disorders and stress, connected to a psychosomatic sub-syndrome involving migraine, back and abdominal pain, reflux, diarrhoea, constipation, and hyperhidrosis. Gambling and shopping were linked to pervasive social issues, theft, and suicidal ideation (expected during hyperdopaminergic impulsive states<sup>65</sup>). Hypersexuality was linked to unintended pregnancy, sexually transmitted diseases, and sexual dysfunction.

Among pramipexole recipients, the prominent cluster included apathy, delusion, and economic problems. The dopamine dysregulation sub-syndrome<sup>66</sup>, closely related to impulsivity but primarily associated with levodopa and apomorphine<sup>67</sup>, involved on and off phenomenon (oscillations in effectiveness and motor and motivational symptoms), excessive levodopa use to avoid off phases, and dopamine agonist withdrawal syndromes (DAWS) upon discontinuation<sup>68</sup>. A cluster aligned with paranoid delusional jealousy (false and unwavering belief in the partner's unfaithfulness), often seen in PD with drug-induced hypersexuality<sup>69</sup> presented challenges in marital relationships, potentially resulting in early placement in a nursing home<sup>70</sup>. We also found a cluster with fear, pain, stress, anxiety, depression, and suicidal ideation, indicative of the transformation of reward-driven impulsivity into stressful risk-averting compulsivity over time<sup>71</sup>. Finally, the co-reporting of two archetypal compulsive symptoms—body-focused repetitive behaviors and stealing behaviors—was evident.

#### 4.5 Bayesian Network: the secondary impact of drug-induced impulsivity

The interplay of events within the context of drug-induced impulsivity is intricate and multifaceted. Events reported alongside drug-induced impulsivity may result from impulsivity itself (like financial problems from gambling) or predispose individuals to impulsivity (e.g., bipolar disorder). Sometimes, events can both trigger and be exacerbated by drug-induced impulsivity (e.g., anxiety<sup>72,73</sup>). Sometimes events are concomitantly mentioned for precision, such as in cases of semantic overlap (e.g., theft and shoplifting, or injury and brain injury). Events associated with drug-induced impulsivity may even be synonyms for well-known impulsivity expressions (e.g., restlessness, referring to excessive wandering and poriomania<sup>69</sup>), or could be the very reason for prescribing the drug, as seen in the off-label use of aripiprazole to prevent behavioral and cognitive decline in brain injury<sup>74</sup> or to address drug dependence<sup>75,76</sup>.

The Bayesian Network a directed acyclic graph representing our dataset, revealed potential directional associations, enabling formulation of hypotheses about clinically plausible causal sequences. Anxiety emerged as a central factor, preceding insomnia, irritability, cognitive impairment, stress, injury, pain (linked to disability and economic problems), depression, and even suicidal ideation. Drug-induced impulsivity manifestations appeared to exacerbate each other. Economic problems had the highest out-degree centrality among aripiprazole recipients, preceding theft, relationship difficulties, and suicidal ideation.

The Bayesian Network provides clinicians with valuable insights on the pivotal nodes that could be targeted by interventions to disrupt the cascade of events and ameliorate the



secondary impact of drug-induced impulsivity. It also highlighted secondary ramifications of main impulsivity manifestations: hypersexuality precedes marital problems through delusional jealousy in pramipexole recipients, while it precedes unintended pregnancy and sexually transmitted diseases in aripiprazole recipients; hyperphagia precedes weight increase in pramipexole recipients and obesity, somnolence, and cognitive impairment in aripiprazole. Marital problems, following delusional jealousy and economic problems in pramipexole recipients, may be of particular interest since they are associated with an early placement in nursing homes<sup>70</sup>. Finally, the Bayesian Network seems to support the higher secondary impact of drug-induced impulsivity in aripiprazole recipients.

#### 4.6 Limitations and Further Developments

While this study provides valuable insights into the intricate interplay of events related to drug-induced impulsivity and its subsequent implications, it is crucial to acknowledge its limitations.

Spontaneous reports, while uniquely granting access to patients' perspective, are susceptible to biases like under-reporting, missing data, and unverified reliability, preventing reliable incidence or prevalence estimates. The high contribution of reports from lawyers may have influenced the higher psychosocial impact attributed to aripiprazole-induced impulsivity. Nonetheless, this study sets the foundation for further studies and a potential score to assess the impact of ADRs on QoL.

Limitations in network analysis methodologies adopted include the Ising estimation's assumptions (pairwise interaction, linear effects, and binary variables), and the inability to account for time and severity in symptom manifestation. The incorporation of negative links could facilitate a more nuanced separation of symptoms that infrequently co-occur. The Bayesian Network lacks bidirectional relationships and cyclic feedback loops and would require the inclusion of all shared cause between any two events (causal Markov condition) limiting its capacity to illuminate causality. These limitations could be rectified by integrating clinical longitudinal data and embedding temporal aspects into the network analysis.

Looking ahead, a broader definition of drug-induced impulsivity could improve sensitivity in case retrieval. Conditions like suicide attempts, hypersomnia, obsessive-compulsive symptoms, explosive anger, personality changes, disturbance in attention, and drug dependence might represent different expressions of this underdefined condition, warranting further exploration<sup>10,67</sup>.

## 5. Conclusion

The profound impact of drug-induced impulsivity reverberates across patients and their families, encompassing psychosocial challenges and organic complications such as metabolic syndrome (in the case of hyperphagia), and sexual health issues (in the case of hypersexuality). Recognizing these potential consequences is crucial for informed pharmacological management and diligent patient monitoring. Network analysis has revealed intriguing co-reporting patterns among adverse events, leading to their classification as sub-syndromes. Notable examples include the emergency of obesity-hypoventilation syndrome with hyperphagia and associations of hypersexuality with delusional jealousy in pramipexole recipients and unintended pregnancy and sexually transmitted diseases in aripiprazole recipients. Our parallel approach effectively avoids the risk of disease-related diathesis compromising analytical integrity, enhancing the robustness of our findings.

For clinicians, this study emphasizes the potential burden of drug-induced impulsivity, and therefore the necessity of meticulous scrutiny into patients' medical histories. Factors such as age, gender, pre-existing mood disorders and family history should be red flags, warranting heightened vigilance. While transitioning to an alternative active ingredient may mitigate impulsivity, it is not always feasible or adequate. Monitoring for potential complications, as unveiled in our work (e.g., obesity-hypoventilation syndrome and delusional jealousy), is pivotal when such transitions are not a viable solution. For example, an overlooked delusional jealousy may result in marital problems and early nursing home placement.

Central to our findings is the pivotal realization that drug reactions rarely occur in isolation; instead, they manifest as syndromes with diverse signs and symptoms. These can be direct reactions to the drug itself, secondary consequences to the reaction, risk factors for the reaction, or comorbidities. Causal chains and loops can contribute to symptom aggravation and chronicity. Identifying syndromes and sub-syndromes, combining network strategies with traditional techniques and clinical judgment, proves a potent strategy for delving into the secondary impact of adverse drug reactions and fostering heightened awareness within clinical practice.

In sum, the intricate relationships between signs and symptoms, coupled with the insights from the Bayesian Network, underscore the multifaceted nature of drug-induced impulsivity. More significantly, it equips clinicians with indispensable tools to discern intervention points, decipher causal sequences, and mitigate the cascading secondary effects associated with drug-induced impulsivity. In doing so, this study contributes to advancing our

comprehension and management of drug-induced impulsivity, ultimately enhancing the well-being and care of affected patients.

## Acknowledgements

MedDRA®, version 25.0 was developed under the auspices of the International Council for Harmonization of Technical Requirements for Pharmaceuticals for Human Use.

Part of the work was presented orally at the SIF congress, 2023, in Rome.

Icons for figures 1, 2, 6, and 7 were obtained using Bing Image Creator.

## Declarations

**Funding:** No specific funding supported this research.

**Conflicts of interest:** The authors declare no conflict of interest specific for this research.

**Ethics approval:** not applicable because spontaneous reports of the FAERS are anonymous and publicly available.

**Consent to participate:** not applicable because spontaneous reports of the FAERS are anonymous and publicly available.

**Consent for publication:** not applicable because spontaneous reports of the FAERS are anonymous and publicly available.

**Software used:** Analyses were performed using R (version 4.2.1)<sup>77</sup> and Python (version 3.8.16)<sup>78</sup>. We relied on several essential packages for network analysis: *IsingFit*<sup>43</sup>, *igraph*<sup>79</sup>, *psych*<sup>80</sup>, and *bnlearn*<sup>81</sup>.

**Availability of data and material:** The data we used comes from the FDA Adverse Event Reporting System (FAERS), and is made publicly available by the FDA as quarterly data downloadable at <https://fis.fda.gov/extensions/FPD-QDE-FAERS/FPD-QDE-FAERS.html>. The algorithm for cleaning FAERS data is open-source at <https://github.com/fusarolimichele/DiAna>, and the cleaned database is available on an OSF repository<sup>82</sup> and through the R package DiAna<sup>83</sup>.

**Code availability:** The code for the project is available on an OSF repository<sup>54</sup>, the function for the Ising network is also available in the DiAna package (cfr. “network\_analysis()”)<sup>83</sup>.

**Author contributions:** MF, SP, LM, conceptualized and designed the study. MF, SP, LM developed the methodology. The formal analysis was performed by MF, SP, LM, VG. MF, SP, VG performed the visualization. MF, SP, LM, VG wrote the original draft. All the authors strongly contributed to the interpretation of results, and to the review and editing of the draft. All the authors read and approved the final version.



## References

1. Engel GL. The need for a new medical model: a challenge for biomedicine. *Science*. 1977; 196: 129–36.
2. Kleinman A, Eisenberg L, Good B. Culture, illness, and care: clinical lessons from anthropologic and cross-cultural research. *Ann. Intern. Med.* 1978; 88: 251–8.
3. Young A. The Anthropologies of Illness and Sickness. *Annu. Rev. Anthropol.* 1982; 11: 257–85.
4. Lorimer S, Cox A, Langford NJ. A patient's perspective: the impact of adverse drug reactions on patients and their views on reporting. *J. Clin. Pharm. Ther.* 2012; 37: 148–52.
5. Suh D-C, Woodall BS, Shin S-K, Santis ERH-D. Clinical and Economic Impact of Adverse Drug Reactions in Hospitalized Patients. *Ann. Pharmacother.* 2000; 34: 1373–9.
6. Rolfes L, van Hunsel F, Taxis K, van Puijenbroek E. The Impact of Experiencing Adverse Drug Reactions on the Patient's Quality of Life: A Retrospective Cross-Sectional Study in the Netherlands. *Drug Saf.* 2016; 39: 769–76.
7. Calvert M, Kyte D, Mercieca-Bebber R, Slade A, Chan A-W, King MT, et al. Guidelines for Inclusion of Patient-Reported Outcomes in Clinical Trial Protocols: The SPIRIT-PRO Extension. *JAMA*. 2018; 319: 483–94.
8. Haag S, Junge L, Lotz F, McGauran N, Paulides M, Potthast R, et al. Results on patient-reported outcomes are underreported in summaries of product characteristics for new drugs. *J. Patient-Rep. Outcomes*. 2021; 5: 127.
9. Weintraub D. Impulse control disorders in Parkinson's disease: A 20-year odyssey. *Mov. Disord. Off. J. Mov. Disord. Soc.* 2019; 34: 447–52.
10. Fusaroli M, Raschi E, Contin M, Sambati L, Menchetti M, Fioritti A, et al. Impulsive Conditions in Parkinson's Disease: a pharmacosurveillance-supported list. *Parkinsonism Relat. Disord.* 2021; 90: 79–83.
11. Fusaroli M, Pellegrini L, Fusaroli R, Raschi E, Menchetti M, Poluzzi E. Behavioral excess and disruptive conduct: a historical and taxonomical approach to the origin of the "Impulse Control Disorders" diagnostic construct. *Addiction*. 2022; n/a. [Cited 2022 Nov 21] Available from <https://onlinelibrary.wiley.com/doi/abs/10.1111/add.16086>
12. Grall-Bronnec M, Victorri-Vigneau C, Donnio Y, Leboucher J, Rousselet M, Thiabaud E, et al. Dopamine Agonists and Impulse Control Disorders: A Complex Association. *Drug Saf.* 2018; 41: 19–75.
13. Tippmann-Peikert M, Park JG, Boeve BF, Shepard JW, Silber MH. Pathologic gambling in patients with restless legs syndrome treated with dopaminergic agonists. *Neurology*. 2007; 68: 301–3.
14. Cornelius JR, Tippmann-Peikert M, Slocumb NL, Frerichs CF, Silber MH. Impulse Control Disorders with the use of Dopaminergic Agents in Restless Legs Syndrome: a Case-Control Study. *Sleep*. 2010; 33: 81–7.
15. Fusaroli M, Raschi E, Giunchi V, Menchetti M, Rimondini Giorgini R, De Ponti F, et al. Impulse Control Disorders by Dopamine Partial Agonists: A Pharmacovigilance-Pharmacodynamic Assessment Through the FDA Adverse Event Reporting System. *Int. J. Neuropsychopharmacol.* 2022; 25: 727–36.
16. Béreau M, Fleury V, Bouthour W, Castrioto A, Lhommée E, Krack P. Hyperdopaminergic behavioral spectrum in Parkinson's disease: A review. *Rev. Neurol. (Paris)*. 2018; 174: 653–63.

17. Jeyadevan A, Bakeberg M, Byrnes M, Kenna J, McGregor S, Ghosh S, et al. Quality of life implications for elevated trait impulsivity in people with Parkinson's disease. *Qual. Life Res.* 2023; 32: 1143–50.
18. Leplow B, Renftle D, Thomas M, Michaelis K, Solbrig S, Maetzler W, et al. Characteristics of behavioural addiction in Parkinson's disease patients with self-reported impulse control disorder and controls matched for levodopa equivalent dose: a matched case–control study. *J. Neural Transm.* 2023; 130: 125–33.
19. Phu AL, Xu Z, Brakoulias V, Mahant N, Fung VSC, Moore GD, et al. Effect of impulse control disorders on disability and quality of life in Parkinson's disease patients. *J. Clin. Neurosci.* 2014; 21: 63–6.
20. Skorvanek M, Rosenberger J, Minar M, Grofik M, Han V, Groothoff JW, et al. Relationship between the non-motor items of the MDS–UPDRS and Quality of Life in patients with Parkinson's disease. *J. Neurol. Sci.* 2015; 353: 87–91.
21. Jesús S, Labrador-Espinosa MA, Adarmes AD, Méndel-Del Barrio C, Martínez-Castrillo JC, Alonso-Cánovas A, et al. Non-motor symptom burden in patients with Parkinson's disease with impulse control disorders and compulsive behaviours: results from the COPPADIS cohort. *Sci. Rep.* 2020; 10: 16893.
22. Schrag A, Hovris A, Morley D, Quinn N, Jahanshahi M. Caregiver-burden in parkinson's disease is closely associated with psychiatric symptoms, falls, and disability. *Parkinsonism Relat. Disord.* 2006; 12: 35–41.
23. Antonini A, Barone P, Bonuccelli U, Annoni K, Asgharnejad M, Stanzione P. ICARUS study: prevalence and clinical features of impulse control disorders in Parkinson's disease. *J. Neurol. Neurosurg. Psychiatry.* 2017; 88: 317–24.
24. Castillon G, Salvo F, Moride Y. The Social Impact of Suspected Adverse Drug Reactions: An analysis of the Canada Vigilance Spontaneous Reporting Database. *Drug Saf.* 2019; 42: 27–34.
25. Research C for DE and. FDA Adverse Event Reporting System (FAERS): Latest Quarterly Data Files. *FDA.* 2019; [Cited 2023 Jul 13] Available from <https://www.fda.gov/drugs/questions-and-answers-fdas-adverse-event-reporting-system-faers/fda-adverse-event-reporting-system-faers-latest-quarterly-data-files>
26. Härmark L, van Hunsel F, Grundmark B. ADR Reporting by the General Public: Lessons Learnt from the Dutch and Swedish Systems. *Drug Saf.* 2015; 38: 337–47.
27. Härmark L, Raine J, Leufkens H, Edwards IR, Moretti U, Sarinic VM, et al. Patient-Reported Safety Information: A Renaissance of Pharmacovigilance? *Drug Saf.* 2016; 39: 883–90.
28. Inácio P, Cavaco A, Airaksinen M. The value of patient reporting to the pharmacovigilance system: a systematic review. *Br. J. Clin. Pharmacol.* 2017; 83: 227–46.
29. Rolfes L, van Hunsel F, Wilkes S, van Grootheest K, van Puijenbroek E. Adverse drug reaction reports of patients and healthcare professionals-differences in reported information. *Pharmacoepidemiol. Drug Saf.* 2015; 24: 152–8.
30. Watson S, Chandler RE, Taavola H, Härmark L, Grundmark B, Zekarias A, et al. Safety Concerns Reported by Patients Identified in a Collaborative Signal Detection Workshop using VigiBase: Results and Reflections from Lareb and Uppsala Monitoring Centre. *Drug Saf.* 2018; 41: 203–12.
31. Fusaroli M, Raschi E, Gatti M, De Ponti F, Poluzzi E. Development of a Network-Based Signal Detection Tool: The COVID-19 Adversome in the FDA Adverse Event Reporting System. *Front. Pharmacol.* 2021; 12: 3542.
32. FAERS Quarterly Data Extract Files. [Cited 2022 Dec 24] Available from <https://fis.fda.gov/extensions/FPD-QDE-FAERS/FPD-QDE-FAERS.html>

33. MedDRA. [Cited 2023 Feb 4] Available from <https://www.meddra.org/>
34. Fusaroli M, Giunchi V, Battini V, Puligheddu S, Khouri C, Carnovale C, et al. Standardization of drug names in the FDA Adverse Event Reporting System: The DiAna dictionary. 2023; : 2023.06.07.23291076. [Cited 2023 Jun 15] Available from <https://www.medrxiv.org/content/10.1101/2023.06.07.23291076v1>
35. Norén GN, Hopstadius J, Bate A. Shrinkage observed-to-expected ratios for robust and transparent large-scale pattern discovery. *Stat. Methods Med. Res.* 2013; 22: 57–69.
36. Church KW, Hanks P. Word Association Norms, Mutual Information, and Lexicography. *Comput. Linguist.* 1990; 16: 22–9.
37. Recchia G, Jones MN. More data trumps smarter algorithms: Comparing pointwise mutual information with latent semantic analysis. *Behav. Res. Methods.* 2009; 41: 647–56.
38. Role F, Nadif M. Handling the Impact of Low Frequency Events on Co-occurrence based Measures of Word Similarity - A Case Study of Pointwise Mutual Information. 2011.
39. Fusaroli M, Pelletti G, Giunchi V, Pugliese C, Bartolucci M, Necibi EN, et al. Deliberate Self-Poisoning: Real-Time Characterization of Suicidal Habits and Toxidromes in the Food and Drug Administration Adverse Event Reporting System. *Drug Saf.* 2023; [Cited 2023 Feb 2] Available from <https://doi.org/10.1007/s40264-022-01269-x>
40. Pauline O, Robert M, Bernardeau C, Hlavaty A, Fusaroli M, Roustit M, et al. Assessment of Reported Adverse Events After Interchanging Between TNF- $\alpha$  Inhibitor Biosimilars in the WHO Pharmacovigilance Database. *BioDrugs.* 2023; [Cited 2023 Jun 12] Available from <https://doi.org/10.1007/s40259-023-00603-8>
41. Orre R, Bate A, Norén GN, Swahn E, Arnborg S, Edwards IR. A bayesian recurrent neural network for unsupervised pattern recognition in large incomplete data sets. *Int. J. Neural Syst.* 2005; 15: 207–22.
42. Chen SF, Goodman J. An empirical study of smoothing techniques for language modeling. **In:** Proceedings of the 34th annual meeting on Association for Computational Linguistics. USA: Association for Computational Linguistics; 1996 [Cited 2023 Mar 17]. p. 310–8. [Cited 2023 Mar 17] Available from <https://doi.org/10.3115/981863.981904>
43. van Borkulo CD, Borsboom D, Epskamp S, Blanken TF, Boschloo L, Schoevers RA, et al. A new method for constructing networks from binary data. *Sci. Rep.* 2014; 4: 5918.
44. Epskamp S, Borsboom D, Fried EI. Estimating psychological networks and their accuracy: A tutorial paper. *Behav. Res. Methods.* 2018; 50: 195–212.
45. Yule GU. On the Methods of Measuring Association Between Two Attributes. *J. R. Stat. Soc.* 1912; 75: 579–652.
46. Newman MEJ, Girvan M. Finding and evaluating community structure in networks. *Phys. Rev. E.* 2004; 69: 026113.
47. Newman MEJ. Fast algorithm for detecting community structure in networks. *Phys. Rev. E.* 2004; 69: 066133.
48. Jaccard P. The Distribution of the Flora in the Alpine Zone.1. *New Phytol.* 1912; 11: 37–50.
49. Rezaei M, Fränti P. Set Matching Measures for External Cluster Validity. *IEEE Trans. Knowl. Data Eng.* 2016; 28: 2173–86.
50. Gates AJ, Wood IB, Hetrick WP, Ahn Y-Y. Element-centric clustering comparison unifies overlaps and hierarchy. *Sci. Rep.* 2019; 9: 8574.
51. Meilă M. Comparing Clusterings by the Variation of Information. **In:** Schölkopf B, Warmuth MK (eds.). Learning Theory and Kernel Machines. Berlin, Heidelberg: Springer; 2003. p. 173–87.

52. Telesford QK, Joyce KE, Hayasaka S, Burdette JH, Laurienti PJ. The Ubiquity of Small-World Networks. *Brain Connect.* 2011; 1: 367–75.
53. Okai D, Samuel M, Askey-Jones S, David AS, Brown RG. Impulse control disorders and dopamine dysregulation in Parkinson's disease: a broader conceptual framework. *Eur. J. Neurol.* 2011; 18: 1379–83.
54. Fusaroli M, Polizzi S, Menestrina L, Giunchi V. Unveiling the Hidden Toll of Drug-Induced Impulse Control Disorders. 2023; [Cited 2023 Aug 20] Available from <https://osf.io/k9v6s/>
55. El Otmani H, sabiry S, Bellakhdar S, El Moutawakil B, Abdoh Rafai M. Othello syndrome in Parkinson's disease: A diagnostic emergency of an underestimated condition. *Rev. Neurol. (Paris).* 2021; 177: 690–3.
56. Weintraub D, Koester J, Potenza MN, Siderowf AD, Stacy M, Voon V, et al. Impulse control disorders in Parkinson disease: a cross-sectional study of 3090 patients. *Arch. Neurol.* 2010; 67: 589–95.
57. Santangelo G, Barone P, Trojano L, Vitale C. Pathological gambling in Parkinson's disease. A comprehensive review. *Parkinsonism Relat. Disord.* 2013; 19: 645–53.
58. Jiménez-Urbietá H, Gago B, Quiroga-Varela A, Rodríguez-Chinchilla T, Merino-Galán L, Oregi A, et al. Pramipexole-induced impulsivity in mildparkinsonian rats: a model of impulse control disorders in Parkinson's disease. *Neurobiol. Aging.* 2019; 75: 126–35.
59. Riddle JL, Rokosik SL, Napier TC. Pramipexole- and methamphetamine-induced reward-mediated behavior in a rodent model of Parkinson's disease and controls. *Behav. Brain Res.* 2012; 233: 15–23.
60. Marín-Lahoz J, Sampedro F, Martínez-Horta S, Pagonabarraga J, Kulisevsky J. Depression as a Risk Factor for Impulse Control Disorders in Parkinson Disease. *Ann. Neurol.* 2019; 86: 762–9.
61. Blum AW, Jacobson K, Grant JE. Legal settlements and the reporting of adverse drug events: Insights from the aripiprazole products liability litigation. *Psychiatry Res.* 2022; 309: 114411.
62. Voon V, Sohr M, Lang AE, Potenza MN, Siderowf AD, Whetteckey J, et al. Impulse control disorders in parkinson disease: A multicenter case-control study. *Ann. Neurol.* 2011; 69: 986–96.
63. Masa JF, Pépin J-L, Borel J-C, Mokheles B, Murphy PB, Sánchez-Quiroga MÁ. Obesity hypoventilation syndrome. *Eur. Respir. Rev.* 2019; 28: 180097.
64. de Jonge P, Alonso J, Stein DJ, Kiejna A, Aguilar-Gaxiola S, Viana MC, et al. Associations between DSM-IV mental disorders and diabetes mellitus: a role for impulse control disorders and depression. *Diabetologia.* 2014; 57: 699–709.
65. Evans AH, Strafella AP, Weintraub D, Stacy M. Impulsive and compulsive behaviors in Parkinson's disease. *Mov. Disord. Off. J. Mov. Disord. Soc.* 2009; 24: 1561–70.
66. De la Casa-Fages B, Grandas F. Dopamine Dysregulation Syndrome and Deep Brain Stimulation of the Subthalamic Nucleus in Parkinson's Disease. *Neurol. Res. Int.* 2011; 2011. [Cited 2021 Jun 16] Available from <https://www.ncbi.nlm.nih.gov/pmc/articles/PMC3216377/>
67. Weintraub D, David AS, Evans AH, Grant JE, Stacy M. Clinical spectrum of impulse control disorders in Parkinson's disease. *Mov. Disord. Off. J. Mov. Disord. Soc.* 2015; 30: 121–7.
68. Yu XX, Fernandez HH. Dopamine agonist withdrawal syndrome: A comprehensive review. *J. Neurol. Sci.* 2017; 374: 53–5.
69. Kataoka H, Sugie K. Delusional Jealousy (Othello Syndrome) in 67 Patients with Parkinson's Disease. *Front. Neurol.* 2018; 9.



70. Aarsland D, Larsen JP, Tandberg E, Laake K. Predictors of Nursing Home Placement in Parkinson's Disease: A Population-Based, Prospective Study. *J. Am. Geriatr. Soc.* 2000; 48: 938–42.
71. Lopez AM, Weintraub D, Claassen DO. Impulse Control Disorders and Related Complications of Parkinson's Disease Therapy. *Semin. Neurol.* 2017; 37: 186–92.
72. Goerlich-Dobre KS, Probst C, Winter L, Witt K, Deuschl G, Möller B, et al. Alexithymia-an independent risk factor for impulsive-compulsive disorders in Parkinson's disease. *Mov. Disord. Off. J. Mov. Disord. Soc.* 2014; 29: 214–20.
73. Vriend C, Pattij T, van der Werf YD, Voorn P, Booij J, Rutten S, et al. Depression and impulse control disorders in Parkinson's disease: Two sides of the same coin? *Neurosci. Biobehav. Rev.* 2014; 38: 60–71.
74. Plummer NR, Tam AW, Mulvaney CA, Preston NJ, Laha SK. Dopamine agonists for traumatic brain injury. *Cochrane Database Syst. Rev.* 2018; [Cited 2023 Apr 14] Available from <https://www.cochranelibrary.com/cdsr/doi/10.1002/14651858.CD013062/full>
75. Feltenstein MW, Do PH, See RE. Repeated aripiprazole administration attenuates cocaine seeking in a rat model of relapse. *Psychopharmacology (Berl.)*. 2009; 207: 401–11.
76. Feltenstein MW, Altar CA, See RE. Aripiprazole blocks reinstatement of cocaine seeking in an animal model of relapse. *Biol. Psychiatry*. 2007; 61: 582–90.
77. R: The R Project for Statistical Computing. [Cited 2023 Feb 4] Available from <https://www.r-project.org/>
78. Welcome to Python.org. *Python.org*. 2023; [Cited 2023 Feb 4] Available from <https://www.python.org/>
79. Csardi G, Nepusz T. The igraph software package for complex network research.
80. Revelle W. *Procedures for Psychological, Psychometric, and Personality Research*. R package version 2.2.9. Northwestern University, Evanston, Illinois: 2022. Available from <https://CRAN.R-project.org/package=psych>
81. Scutari M. Learning Bayesian Networks with the bnlearn R Package. *J. Stat. Softw.* 2010; 35: 1–22.
82. Fusaroli M, Giunchi V. DiAna: Repository for FAERS cleaning and analysis. 2023; [Cited 2023 Aug 20] Available from <https://osf.io/zqu89/>
83. Fusaroli M, Giunchi V. DiAna R package: Advanced Disproportionality Analysis in the FAERS for Drug Safety. 2023; [Cited 2023 Oct 21] Available from [https://github.com/fusarolimichele/DiAna\\_package](https://github.com/fusarolimichele/DiAna_package)
