# Supplementary material for: Unveiling the Burden of Drug-Induced Impulsivity: A Network Analysis of the FDA Adverse Event Reporting System
Source: bioRxiv or medRxiv preprint supplement (doi:10.1101/2023.11.17.23298635), 2024-04-10
Supplement: Supplementary file [file media-1.pdf]

## Supplementary Material

**Table S1. Expressions of pathological impulsivity.** MedDRA query and behavioral subqueries used for retrieving drug-induced impulsivity.

| Impulsivity expression            | Preferred Terms (PT)                                                                                                                                                                  |
|-----------------------------------|---------------------------------------------------------------------------------------------------------------------------------------------------------------------------------------|
| Pathological gambling             | gambling disorder, gambling                                                                                                                                                           |
| Hypersexuality                    | compulsive sexual behaviour, hypersexuality, excessive masturbation, excessive sexual fantasies, libido increased, sexual activity increased, kluger-bucy syndrome                    |
| Paraphilia                        | erotophonophilia, exhibitionism, fetishism, frotteurism, masochism, paraphilia, pedophilia, sadism, transvestism, voyeurism, sexually inappropriate behaviour                         |
| Compulsive shopping               | compulsive shopping                                                                                                                                                                   |
| Hyperphagia                       | binge eating, food craving, hyperphagia, increased appetite                                                                                                                           |
| Gaming disorder                   | gaming disorder                                                                                                                                                                       |
| Pyromania                         | pyromania                                                                                                                                                                             |
| Kleptomania                       | kleptomania                                                                                                                                                                           |
| Compulsive hoarding               | compulsive hoarding                                                                                                                                                                   |
| Excessive exercise                | excessive exercise                                                                                                                                                                    |
| Overwork                          | overwork                                                                                                                                                                              |
| Poriomania                        | poriomania                                                                                                                                                                            |
| Body-focused repetitive behaviors | compulsive cheek biting, compulsive lip biting, dermatillomania, dermatophagia, nail picking, compulsive handwashing, trichotemnomania, trichotillomania, onychophagia, thumb sucking |
| Stereotypy                        | automatism, stereotypy                                                                                                                                                                |
| Impulsivity                       | impulse-control disorder, impulsive behaviour, disinhibition, behavioural addiction                                                                                                   |

**Table S2. Manifestation of impulsivity in the two populations investigated.**

| Pramipexole           |              | Aripiprazole          |              |
|-----------------------|--------------|-----------------------|--------------|
| Gambling disorder     | 1345 (4.87%) | Gambling disorder     | 2067 (2.58%) |
| Hypersexuality        | 612 (2.22%)  | Hypersexuality        | 1077 (1.34%) |
| Impulsivity           | 453 (1.64%)  | Compulsive shopping   | 1029 (1.28%) |
| Compulsive shopping   | 384 (1.39%)  | Hyperphagia           | 868 (1.08%)  |
| Hyperphagia           | 334 (1.21%)  | Impulsivity           | 730 (0.91%)  |
| Stereotypy            | 87 (0.32%)   | Body-focused disorder | 316 (0.39%)  |
| Paraphilia            | 64 (0.23%)   | Compulsive hoarding   | 244 (0.30%)  |
| Compulsive hoarding   | 26 (0.09%)   | Paraphilia            | 78 (0.10%)   |
| Body-focused disorder | 18 (0.07%)   | Stereotypy            | 42 (0.05%)   |
| Excessive exercise    | 7 (0.03%)    | Poriomania            | 15 (0.02%)   |
| Kleptomania           | 7 (0.03%)    | Kleptomania           | 6 (0.01%)    |
| Gaming disorder       | 3 (0.01%)    | Pyromania             | 4 (0.00%)    |
| Poriomania            | 2 (0.01%)    | Overwork              | 1 (0.00%)    |
| Pyromania             | 1 (0.00%)    |                       |              |

**Table S3. Features of pramipexole reports.** We compared cases of pramipexole-related pathological impulsivity vs any other report recording pramipexole. Chi-square test was performed for categorical values, Mann-Whitney for continuous ones, and p-values were corrected for multiple comparison using the Holm-Bonferroni method.

| VARIABLE                | Impulsivity Reports<br>N = 2,066 |                     | Other Reports<br>N = 25,535 |                      | p-value          |
|-------------------------|----------------------------------|---------------------|-----------------------------|----------------------|------------------|
|                         | N                                | %                   | N                           | %                    |                  |
| <b>Gender</b>           |                                  |                     |                             |                      | <b>&lt;0.001</b> |
| Woman                   | 821                              | 42.58               | 14,964                      | 63.01                |                  |
| Man                     | 1,107                            | 57.42               | 8,784                       | 36.99                |                  |
| Unknown                 | 138                              | -                   | 1,787                       | -                    |                  |
| <b>Age (years old)</b>  |                                  |                     |                             |                      | <b>&lt;0.001</b> |
| Unknown                 |                                  | 56 (48-64)<br>903   |                             | 67 (57-75)<br>8,482  |                  |
| <b>Weight (Kg)</b>      |                                  |                     |                             |                      | <b>&lt;0.001</b> |
| Unknown                 |                                  | 83 (72-95)<br>1,386 |                             | 79 (65-95)<br>16,330 |                  |
| <b>Outcome</b>          |                                  |                     |                             |                      | <b>&lt;0.001</b> |
| Death                   | 40                               | 1.94                | 1,883                       | 7.37                 |                  |
| Life Threatening        | 50                               | 2.42                | 713                         | 2.79                 |                  |
| Disability              | 90                               | 4.36                | 687                         | 2.69                 |                  |
| Required Intervention   | 27                               | 1.31                | 74                          | 0.29                 |                  |
| Hospitalization         | 305                              | 14.76               | 7,378                       | 28.89                |                  |
| Congenital              | 0                                | 0.00                | 20                          | 0.08                 |                  |
| Other Serious           | 627                              | 30.35               | 6,205                       | 24.30                |                  |
| Non-Serious             | 927                              | 44.87               | 8,575                       | 33.58                |                  |
| <b>Reporter</b>         |                                  |                     |                             |                      |                  |
| Consumer                | 1,092                            | 56.73               | 10,315                      | 44.75                |                  |
| Healthcare practitioner | 50                               | 2.60                | 1,378                       | 5.98                 |                  |
| Lawyer                  | 29                               | 1.51                | 220                         | 0.95                 |                  |
| Other                   | 380                              | 19.74               | 3,366                       | 14.60                |                  |
| Pharmacist              | 29                               | 1.51                | 1,822                       | 7.90                 |                  |
| Physician               | 345                              | 17.92               | 5,950                       | 25.81                |                  |
| Unknown                 | 141                              | -                   | 2,484                       | -                    |                  |

**Table S4. Features of aripiprazole reports.** We compared cases of aripiprazole-related pathological impulsivity vs any other report recording aripiprazole. Chi-square test was performed for categorical values, Mann-Whitney for continuous ones, and p-values were corrected for multiple comparison using the Holm-Bonferroni method.

| VARIABLE                | Impulsivity Reports<br>N = 3,609 |             | Other Reports<br>N = 76,629 |            | p-value          |
|-------------------------|----------------------------------|-------------|-----------------------------|------------|------------------|
|                         | N                                | %           | N                           | %          |                  |
| <b>Gender</b>           |                                  |             |                             |            | <b>&lt;0.001</b> |
| Woman                   | 1,624                            | 51.41       | 40,454                      | 59.28      |                  |
| Man                     | 1,535                            | 48.59       | 27,792                      | 40.72      |                  |
| Unknown                 | 450                              | -           | 8,383                       | -          |                  |
| <b>Age (years old)</b>  |                                  | 40 (25-51)  |                             | 41 (26-55) | <b>&lt;0.001</b> |
| Unknown                 |                                  | 1,951       |                             | 25,267     |                  |
| <b>Weight (Kg)</b>      |                                  | 82 (68-104) |                             | 79 (63-98) | <b>&lt;0.001</b> |
| Unknown                 |                                  | 2,876       |                             | 55,594     |                  |
| <b>Outcome</b>          |                                  |             |                             |            | <b>&lt;0.001</b> |
| Death                   | 31                               | 0.86        | 4,099                       | 5.35       |                  |
| Life Threatening        | 61                               | 1.69        | 2,823                       | 3.68       |                  |
| Disability              | 483                              | 13.38       | 1,868                       | 2.44       |                  |
| Required Intervention   | 12                               | 0.33        | 280                         | 0.37       |                  |
| Hospitalization         | 1,205                            | 33.39       | 17,921                      | 23.39      |                  |
| Congenital              | 0                                | 0.00        | 325                         | 0.42       |                  |
| Other Serious           | 896                              | 24.83       | 21,051                      | 27.47      |                  |
| Non-Serious             | 921                              | 25.52       | 28,262                      | 36.88      |                  |
| <b>Reporter</b>         |                                  |             |                             |            |                  |
| Consumer                | 1,416                            | 40.18       | 34,977                      | 48.55      |                  |
| Healthcare practitioner | 173                              | 4.91        | 4,146                       | 5.76       |                  |
| Lawyer                  | 1,201                            | 34.08       | 790                         | 1.10       |                  |
| Other                   | 256                              | 7.26        | 10,795                      | 14.98      |                  |
| Pharmacist              | 45                               | 1.28        | 4,159                       | 5.77       |                  |
| Physician               | 433                              | 12.29       | 17,173                      | 23.84      |                  |
| Unknown                 | 85                               | -           | 4,589                       | -          |                  |

**Table S5. Events disproportionally reported with aripiprazole-induced impulsivity. Ordered by N.**

| Event                                 | Perc (%) | Information Component Median (95% CI) [N] |
|---------------------------------------|----------|-------------------------------------------|
| economic problem                      | 37,85    | 4.28 (4.19-4.34) [1366]                   |
| obsessive-compulsive disorder         | 33,19    | 4.16 (4.07-4.23) [1198]                   |
| product use in unapproved indication  | 27,51    | 2.8 (2.69-2.87) [993]                     |
| Injury                                | 25,10    | 4 (3.9-4.08) [906]                        |
| mental disorder                       | 23,75    | 3.7 (3.59-3.78) [857]                     |
| suicidal ideation                     | 23,47    | 2.69 (2.58-2.77) [847]                    |
| weight increased                      | 23,19    | 1.83 (1.71-1.91) [837]                    |
| emotional distress                    | 22,80    | 3.75 (3.63-3.83) [823]                    |
| Anxiety                               | 21,56    | 2.2 (2.09-2.29) [778]                     |
| suicide attempt                       | 21,50    | 2.99 (2.88-3.08) [776]                    |
| condition aggravated                  | 20,34    | 2.91 (2.79-3) [734]                       |
| eating disorder                       | 16,15    | 4.05 (3.92-4.15) [583]                    |
| Pain                                  | 14,35    | 2.45 (2.3-2.55) [518]                     |
| loss of employment                    | 12,64    | 4.33 (4.18-4.44) [456]                    |
| Disability                            | 11,42    | 3.79 (3.63-3.91) [412]                    |
| Anhedonia                             | 10,94    | 3.75 (3.59-3.87) [395]                    |
| Bankruptcy                            | 10,58    | 4.43 (4.26-4.55) [382]                    |
| Insomnia                              | 8,04     | 1.13 (0.94-1.27) [290]                    |
| Divorced                              | 7,59     | 4.38 (4.19-4.53) [274]                    |
| Homeless                              | 6,93     | 4.37 (4.16-4.52) [250]                    |
| sexual dysfunction                    | 6,79     | 3.25 (3.04-3.4) [245]                     |
| Depression                            | 6,62     | 0.78 (0.57-0.94) [239]                    |
| Fatigue                               | 6,62     | 0.78 (0.57-0.94) [239]                    |
| Theft                                 | 5,79     | 4.32 (4.09-4.48) [209]                    |
| Shoplifting                           | 5,02     | 4.37 (4.12-4.54) [181]                    |
| neuropsychiatric symptoms             | 4,74     | 4.35 (4.1-4.53) [171]                     |
| Irritability                          | 4,54     | 1.73 (1.47-1.91) [164]                    |
| Aggression                            | 4,35     | 1.26 (1-1.45) [157]                       |
| Akathisia                             | 4,05     | 0.89 (0.62-1.09) [146]                    |
| Somnolence                            | 4,02     | 0.38 (0.1-0.57) [145]                     |
| Headache                              | 4,02     | 0.51 (0.24-0.71) [145]                    |
| Restlessness                          | 3,69     | 1.08 (0.79-1.28) [133]                    |
| Agitation                             | 3,57     | 0.76 (0.47-0.97) [129]                    |
| abnormal behaviour                    | 3,44     | 1.28 (0.98-1.49) [124]                    |
| Mania                                 | 3,13     | 1.11 (0.8-1.33) [113]                     |
| mental impairment                     | 3,08     | 2.26 (1.95-2.49) [111]                    |
| sexually transmitted disease          | 3,05     | 4.24 (3.93-4.47) [110]                    |
| Hypertension                          | 2,96     | 1.01 (0.69-1.24) [107]                    |
| Asthenia                              | 2,96     | 0.89 (0.57-1.13) [107]                    |
| personal relationship issue           | 2,94     | 3.9 (3.58-4.13) [106]                     |
| Obesity                               | 2,91     | 1.42 (1.1-1.66) [105]                     |
| weight decreased                      | 2,72     | 0.79 (0.46-1.03) [98]                     |
| disturbance in attention              | 2,72     | 1.51 (1.17-1.75) [98]                     |
| feeling abnormal                      | 2,72     | 0.37 (0.04-0.61) [98]                     |
| euphoric mood                         | 2,69     | 3.02 (2.68-3.26) [97]                     |
| social problem                        | 2,66     | 3.78 (3.45-4.03) [96]                     |
| memory impairment                     | 2,60     | 1.05 (0.71-1.29) [94]                     |
| sleep disorder                        | 2,60     | 1.53 (1.19-1.77) [94]                     |
| Diarrhoea                             | 2,49     | 0.54 (0.19-0.8) [90]                      |
| therapeutic product effect incomplete | 2,38     | 1.88 (1.52-2.14) [86]                     |
| depressed mood                        | 2,36     | 1.68 (1.32-1.94) [85]                     |
| brain injury                          | 2,36     | 3.11 (2.75-3.37) [85]                     |
| Hyperhidrosis                         | 2,27     | 0.91 (0.54-1.17) [82]                     |

| Event                                             | Perc (%) | Information Component Median (95% CI) [N] |
|---------------------------------------------------|----------|-------------------------------------------|
| sedation                                          | 2,24     | 0.72 (0.36-0.99) [81]                     |
| anger                                             | 2,19     | 1.39 (1.02-1.66) [79]                     |
| hallucination, auditory                           | 2,13     | 0.63 (0.25-0.9) [77]                      |
| prescribed overdose                               | 2,13     | 1.89 (1.52-2.17) [77]                     |
| constipation                                      | 2,11     | 0.83 (0.45-1.1) [76]                      |
| back pain                                         | 2,11     | 1.12 (0.74-1.39) [76]                     |
| blood glucose increased                           | 2,08     | 0.73 (0.34-1) [75]                        |
| psychosexual disorder                             | 2,02     | 4.1 (3.71-4.38) [73]                      |
| stress                                            | 2,00     | 1.9 (1.51-2.18) [72]                      |
| hospitalisation                                   | 2,00     | 0.68 (0.29-0.96) [72]                     |
| blood cholesterol increased                       | 1,94     | 0.95 (0.55-1.23) [70]                     |
| arthralgia                                        | 1,88     | 0.78 (0.37-1.07) [68]                     |
| toxicity to various agents                        | 1,83     | 0.48 (0.07-0.77) [66]                     |
| gastroesophageal reflux disease                   | 1,83     | 1.97 (1.57-2.27) [66]                     |
| fear                                              | 1,83     | 2.1 (1.69-2.4) [66]                       |
| decreased appetite                                | 1,77     | 0.75 (0.34-1.05) [64]                     |
| hypoesthesia                                      | 1,69     | 1.1 (0.68-1.41) [61]                      |
| antipsychotic drug level below therapeutic        | 1,66     | 3.69 (3.26-3.99) [60]                     |
| therapeutic product effect variable               | 1,63     | 4.06 (3.63-4.37) [59]                     |
| hypersomnia                                       | 1,61     | 1.61 (1.17-1.92) [58]                     |
| leukopenia                                        | 1,55     | 1.79 (1.35-2.11) [56]                     |
| drug dependence                                   | 1,55     | 1.88 (1.44-2.2) [56]                      |
| nightmare                                         | 1,50     | 1.87 (1.42-2.19) [54]                     |
| unintended pregnancy                              | 1,50     | 3.71 (3.26-4.04) [54]                     |
| blood triglycerides increased                     | 1,47     | 1.15 (0.69-1.48) [53]                     |
| cough                                             | 1,44     | 1.06 (0.6-1.39) [52]                      |
| poor quality sleep                                | 1,36     | 2.25 (1.78-2.59) [49]                     |
| abdominal pain                                    | 1,36     | 0.74 (0.27-1.08) [49]                     |
| psychomotor hyperactivity                         | 1,33     | 1.32 (0.84-1.66) [48]                     |
| paranoia                                          | 1,30     | 0.64 (0.15-0.98) [47]                     |
| gastrointestinal surgery                          | 1,30     | 4.06 (3.57-4.41) [47]                     |
| migraine                                          | 1,27     | 1.2 (0.71-1.55) [46]                      |
| bipolar disorder                                  | 1,27     | 0.96 (0.47-1.31) [46]                     |
| mood swings                                       | 1,27     | 1.23 (0.74-1.58) [46]                     |
| dyslipidaemia                                     | 1,25     | 3.12 (2.62-3.47) [45]                     |
| amnesia                                           | 1,25     | 0.8 (0.31-1.16) [45]                      |
| thinking abnormal                                 | 1,19     | 0.86 (0.35-1.22) [43]                     |
| affective disorder                                | 1,19     | 1.96 (1.45-2.32) [43]                     |
| dyspepsia                                         | 1,16     | 1.8 (1.28-2.16) [42]                      |
| hunger                                            | 1,16     | 2.14 (1.63-2.51) [42]                     |
| sleep apnoea syndrome                             | 1,16     | 1.3 (0.79-1.67) [42]                      |
| dependence                                        | 1,16     | 3.29 (2.78-3.66) [42]                     |
| myalgia                                           | 1,14     | 0.55 (0.03-0.92) [41]                     |
| crying                                            | 1,14     | 0.81 (0.29-1.18) [41]                     |
| panic attack                                      | 1,14     | 1.03 (0.51-1.4) [41]                      |
| incorrect dose administered                       | 1,14     | 0.69 (0.17-1.06) [41]                     |
| muscle twitching                                  | 1,11     | 0.79 (0.26-1.16) [40]                     |
| prescribed underdose                              | 1,11     | 0.89 (0.37-1.27) [40]                     |
| personality disorder                              | 1,08     | 2.66 (2.13-3.04) [39]                     |
| apathy                                            | 1,08     | 1.25 (0.71-1.63) [39]                     |
| alanine aminotransferase increased                | 1,08     | 1.05 (0.52-1.43) [39]                     |
| loss of personal independence in daily activities | 1,05     | 1.12 (0.58-1.51) [38]                     |
| cognitive disorder                                | 1,03     | 0.79 (0.25-1.18) [37]                     |
| low density lipoprotein increased                 | 1,03     | 3.22 (2.67-3.61) [37]                     |

**Table S6. Events disproportionally reported with pramipexole-induced impulsivity. Ordered by N.**

| Event                           | Perc (%) | Information Component Median (95%CI) [N] |
|---------------------------------|----------|------------------------------------------|
| obsessive-compulsive disorder   | 26,77    | 3.47 (3.33-3.57) [553]                   |
| emotional distress              | 21,35    | 3.42 (3.26-3.54) [441]                   |
| Depression                      | 20,67    | 2.43 (2.27-2.55) [427]                   |
| Pain                            | 16,02    | 1.64 (1.45-1.77) [331]                   |
| Anxiety                         | 13,79    | 1.93 (1.73-2.07) [285]                   |
| suicidal ideation               | 9,73     | 2.7 (2.47-2.87) [201]                    |
| weight increased                | 9,29     | 1.93 (1.7-2.11) [192]                    |
| Insomnia                        | 7,12     | 0.79 (0.52-0.99) [147]                   |
| abnormal behaviour              | 6,73     | 2.52 (2.24-2.72) [139]                   |
| Somnolence                      | 6,39     | 0.72 (0.43-0.92) [132]                   |
| economic problem                | 6,05     | 3.15 (2.85-3.36) [125]                   |
| Stress                          | 5,86     | 2.5 (2.2-2.71) [121]                     |
| suicide attempt                 | 5,28     | 2.74 (2.43-2.97) [109]                   |
| Dyskinesia                      | 4,70     | 0.62 (0.28-0.86) [97]                    |
| Fear                            | 4,65     | 2.95 (2.61-3.19) [96]                    |
| Injury                          | 4,11     | 2.53 (2.17-2.78) [85]                    |
| Aggression                      | 3,05     | 1.9 (1.48-2.2) [63]                      |
| personality change              | 2,66     | 2.93 (2.49-3.26) [55]                    |
| eating disorder                 | 2,47     | 2.95 (2.49-3.28) [51]                    |
| Dependence                      | 2,37     | 3.26 (2.79-3.6) [49]                     |
| hallucination, visual           | 2,37     | 0.69 (0.21-1.03) [49]                    |
| psychomotor hyperactivity       | 2,37     | 2.24 (1.76-2.58) [49]                    |
| dopamine dysregulation syndrome | 2,32     | 2.72 (2.24-3.07) [48]                    |
| Overdose                        | 2,27     | 1.27 (0.79-1.62) [47]                    |
| sleep disorder                  | 2,23     | 1.07 (0.58-1.42) [46]                    |
| psychotic disorder              | 2,23     | 1.56 (1.06-1.91) [46]                    |
| Agitation                       | 2,18     | 0.81 (0.32-1.17) [45]                    |
| mental disorder                 | 2,13     | 2.24 (1.74-2.6) [44]                     |

| Event                                | Perc (%) | Information Component Median (95%CI) [N] |
|--------------------------------------|----------|------------------------------------------|
| drug withdrawal syndrome             | 1,94     | 1.78 (1.26-2.16) [40]                    |
| drug dependence                      | 1,94     | 2.34 (1.81-2.71) [40]                    |
| irritability                         | 1,89     | 1.95 (1.42-2.33) [39]                    |
| drug abuse                           | 1,89     | 2.46 (1.93-2.84) [39]                    |
| mania                                | 1,84     | 2.02 (1.48-2.4) [38]                     |
| on and off phenomenon                | 1,79     | 0.87 (0.32-1.26) [37]                    |
| cognitive disorder                   | 1,74     | 1.04 (0.48-1.43) [36]                    |
| compulsions                          | 1,74     | 3.05 (2.49-3.44) [36]                    |
| sudden onset of sleep                | 1,74     | 1.61 (1.05-2) [36]                       |
| crying                               | 1,60     | 1.86 (1.28-2.27) [33]                    |
| delusion                             | 1,60     | 0.93 (0.35-1.34) [33]                    |
| apathy                               | 1,45     | 2.7 (2.09-3.13) [30]                     |
| jealous delusion                     | 1,45     | 2.58 (1.98-3.02) [30]                    |
| restlessness                         | 1,40     | 0.69 (0.07-1.13) [29]                    |
| disturbance in attention             | 1,40     | 1 (0.38-1.44) [29]                       |
| hypomania                            | 1,40     | 2.6 (1.98-3.04) [29]                     |
| bipolar disorder                     | 1,36     | 2.2 (1.57-2.64) [28]                     |
| thinking abnormal                    | 1,36     | 1.91 (1.28-2.36) [28]                    |
| withdrawal syndrome                  | 1,31     | 1.35 (0.71-1.8) [27]                     |
| depressed mood                       | 1,31     | 0.95 (0.31-1.4) [27]                     |
| major depression                     | 1,26     | 2.69 (2.03-3.15) [26]                    |
| anger                                | 1,21     | 2.04 (1.37-2.51) [25]                    |
| paranoia                             | 1,21     | 1.54 (0.87-2.01) [25]                    |
| marital problem                      | 1,11     | 3.3 (2.61-3.79) [23]                     |
| anhedonia                            | 1,11     | 2.09 (1.39-2.58) [23]                    |
| product use in unapproved indication | 1,11     | 0.78 (0.09-1.27) [23]                    |
| emotional disorder                   | 1,06     | 1.48 (0.76-1.98) [22]                    |
| mental impairment                    | 1,02     | 1.52 (0.79-2.03) [21]                    |

**Table S7. Nodes with highest degree-centrality.**

| <b>Aripiprazole</b>           |    |                                      |    |                                      |    |
|-------------------------------|----|--------------------------------------|----|--------------------------------------|----|
| Ising                         |    | Phi                                  |    | PPMI                                 |    |
| economic problem              | 24 | irritability                         | 49 | overwork                             | 97 |
| gambling disorder             | 20 | anxiety                              | 47 | pyromania                            | 89 |
| mental disorder               | 16 | product use in unapproved indication | 44 | kleptomania                          | 85 |
| obsessive-compulsive disorder | 16 | suicide attempt                      | 41 | poriomania                           | 60 |
| compulsive shopping           | 15 | obsessive-compulsive disorder        | 39 | anxiety                              | 45 |
| Fatigue                       | 15 | depression                           | 38 | product use in unapproved indication | 43 |
| depressed mood                | 15 | economic problem                     | 38 | suicide attempt                      | 39 |
| Insomnia                      | 15 | insomnia                             | 35 | obsessive-compulsive disorder        | 39 |
| impulsivity                   | 14 | suicidal ideation                    | 35 | economic problem                     | 38 |
| emotional distress            | 13 | asthenia                             | 34 | gambling disorder                    | 37 |

| <b>Pramipexole</b>       |    |                    |    |                                      |    |
|--------------------------|----|--------------------|----|--------------------------------------|----|
| Ising                    |    | Phi                |    | PPMI                                 |    |
| gambling disorder        | 10 | mental disorder    | 20 | pyromania                            | 60 |
| emotional distress       | 9  | agitation          | 18 | poriomania                           | 57 |
| Dyskinesia               | 7  | anxiety            | 14 | gaming disorder                      | 55 |
| Anxiety                  | 7  | bipolar disorder   | 14 | excessive exercise                   | 48 |
| depression               | 7  | cognitive disorder | 14 | kleptomania                          | 47 |
| emotional disorder       | 6  | crying             | 14 | body-focused disorder                | 39 |
| stereotypy               | 6  | depression         | 14 | paranoia                             | 32 |
| mental disorder          | 5  | insomnia           | 14 | emotional disorder                   | 31 |
| cognitive disorder       | 5  | apathy             | 13 | mental impairment                    | 31 |
| drug withdrawal syndrome | 5  | abnormal behaviour | 12 | product use in unapproved indication | 30 |

**Table S8. Aripiprazole edges.** The ten strongest links for the three networks of aripiprazole are shown. Note that the links are undirected, therefore the two nodes may be switched.

| Ising                                      |      |                                            | $\varphi$                                  |      |                                       | PPMI                                       |      |                                     |
|--------------------------------------------|------|--------------------------------------------|--------------------------------------------|------|---------------------------------------|--------------------------------------------|------|-------------------------------------|
| antipsychotic drug level below therapeutic | 8.21 | therapeutic product effect variable        | antipsychotic drug level below therapeutic | 0.99 | therapeutic product effect variable   | overwork                                   | 8.84 | pyromania                           |
| theft                                      | 7.26 | shoplifting                                | antipsychotic drug level below therapeutic | 0.95 | toxicity                              | kleptomania                                | 8.33 | overwork                            |
| therapeutic product effect incomplete      | 6.18 | therapeutic product effect variable        | therapeutic product effect variable        | 0.94 | toxicity                              | overwork                                   | 7.08 | poriomania                          |
| toxicity to various agents                 | 6    | antipsychotic drug level below therapeutic | antipsychotic drug level below therapeutic | 0.93 | leukopenia                            | kleptomania                                | 6.96 | pyromania                           |
| mental impairment                          | 4.96 | social problem                             | leukopenia                                 | 0.92 | therapeutic product effect variable   | antipsychotic drug level below therapeutic | 5.95 | therapeutic product effect variable |
| obesity                                    | 4.32 | dyslipidaemia                              | shoplifting                                | 0.91 | theft                                 | antipsychotic drug level below therapeutic | 5.89 | leukopenia                          |
| therapeutic product effect incomplete      | 4.16 | toxicity to various agents                 | leukopenia                                 | 0.89 | toxicity                              | leukopenia                                 | 5.89 | therapeutic product effect variable |
| suicide attempt                            | 4.16 | suicidal ideation                          | therapeutic product effect incomplete      | 0.83 | therapeutic product effect variable   | muscle twitching                           | 5.84 | personality disorder                |
| euphoric mood                              | 4.1  | antipsychotic drug level below therapeutic | therapeutic product effect incomplete      | 0.82 | toxicity                              | antipsychotic drug level below therapeutic | 5.81 | toxicity to various agents          |
| gastrooesophageal reflux disease           | 3.99 | migraine                                   | antipsychotic drug level below therapeutic | 0.82 | therapeutic product effect incomplete | therapeutic product effect variable        | 5.81 | toxicity to various agents          |

**Table S9. Pramipexole edges.** The ten strongest links for the three networks of pramipexole are shown. Note that the links are undirected, therefore the two nodes may be switched.

| Ising                 |      |                    | $\phi$             |      |                       | PPMI               |      |                 |
|-----------------------|------|--------------------|--------------------|------|-----------------------|--------------------|------|-----------------|
| body-focused disorder | 3.11 | kleptomania        | emotional distress | 0.56 | pain                  | poriomania         | 8.82 | pyromania       |
| mental impairment     | 3.09 | mental disorder    | emotional distress | 0.55 | OCD                   | gaming disorder    | 8.39 | pyromania       |
| on and off phenomenon | 3.05 | dyskinesia         | hyperphagia        | 0.5  | weight increased      | gaming disorder    | 7.8  | poriomania      |
| hyperphagia           | 2.67 | weight increased   | anxiety            | 0.48 | fear                  | excessive exercise | 7.32 | pyromania       |
| paranoia              | 2.66 | psychotic disorder | anxiety            | 0.47 | stress                | kleptomania        | 7.32 | pyromania       |
| anxiety               | 2.61 | fear               | anxiety            | 0.43 | depression            | excessive exercise | 6.74 | poriomania      |
| jealous delusion      | 2.46 | marital problem    | depression         | 0.41 | stress                | kleptomania        | 6.74 | poriomania      |
| pain                  | 2.36 | emotional distress | fear               | 0.41 | pain                  | paranoia           | 6.39 | pyromania       |
| cognitive disorder    | 2.36 | emotional disorder | mental disorder    | 0.39 | mental impairment     | excessive exercise | 3.3  | gaming disorder |
| depressed mood        | 2.3  | anhedonia          | dyskinesia         | 0.38 | on and off phenomenon | gaming disorder    | 3.3  | kleptomania     |



**Table S10. Aripiprazole clusters obtained from Ising and Phi estimation.** Phi and Ising clusters are shown side by side. Ising clusters are color-coded, to show the similarities with Phi.

| Ising                                                                                                                                                                                                                                                                                                                                                                                                                                                                                                                                                                                                                                                                                                                                                                                                                                                                                                                                                                                                                                                                                                                                                                                                                                                                                                                                                                                                                                                                                                                                                                                                                                                         | PHI                                                                                                                                                                                                                                                                                                                                                                                                                                                                                                                                                                                                                                                                                                                                                                                                                                                                                                                                                                                                                                                                                                                             | PPMI                                                                                                                                                                                                                                                                                                                                                                                                                                                                                                                                                                                                                                                                                                                                                                                                                |
|---------------------------------------------------------------------------------------------------------------------------------------------------------------------------------------------------------------------------------------------------------------------------------------------------------------------------------------------------------------------------------------------------------------------------------------------------------------------------------------------------------------------------------------------------------------------------------------------------------------------------------------------------------------------------------------------------------------------------------------------------------------------------------------------------------------------------------------------------------------------------------------------------------------------------------------------------------------------------------------------------------------------------------------------------------------------------------------------------------------------------------------------------------------------------------------------------------------------------------------------------------------------------------------------------------------------------------------------------------------------------------------------------------------------------------------------------------------------------------------------------------------------------------------------------------------------------------------------------------------------------------------------------------------|---------------------------------------------------------------------------------------------------------------------------------------------------------------------------------------------------------------------------------------------------------------------------------------------------------------------------------------------------------------------------------------------------------------------------------------------------------------------------------------------------------------------------------------------------------------------------------------------------------------------------------------------------------------------------------------------------------------------------------------------------------------------------------------------------------------------------------------------------------------------------------------------------------------------------------------------------------------------------------------------------------------------------------------------------------------------------------------------------------------------------------|---------------------------------------------------------------------------------------------------------------------------------------------------------------------------------------------------------------------------------------------------------------------------------------------------------------------------------------------------------------------------------------------------------------------------------------------------------------------------------------------------------------------------------------------------------------------------------------------------------------------------------------------------------------------------------------------------------------------------------------------------------------------------------------------------------------------|
|  Hypersomnia; sleep disorder; insomnia; somnolence<br> Fatigue; asthenia; feeling abnormal<br> Constipation<br> Decreased appetite; weight decreased<br> Panic attack; stress; bipolar disorder; crying; depressed mood; depression; apathy; mood swings; mania<br> Aggression; anger; irritability<br> Psychomotor hyperactivity; restlessness; agitation<br> Abnormal behaviour<br> Myalgia<br> Drug dependence<br> Disturbance in attention; memory impairment<br> Hallucination, auditory<br><b>impulsivity</b> Paraphilia; stereotypy<br> Headache | Hypersomnia; sleep disorder; insomnia<br>Fatigue; asthenia; feeling abnormal<br>Constipation; <b>abdominal pain</b><br>Decreased appetite<br>Panick attack; stress; bipolar disorder; crying; depressed mood; depression; apathy; mood swings; mania; <b>affective disorder</b><br>Aggression; anger<br>Psychomotor hyperactivity; restlessness; agitation<br>Abnormal behaviour; thinking abnormal<br>Myalgia; <b>arthralgia; back pain</b><br>Drug dependence; dependence<br>Disturbance in attention; <b>amnesia; cognitive disorder</b><br>Hallucination, auditory; paranoia<br>Paraphilia; stereotypy; kleptomania; poriomania<br> <b>Cough</b><br> Loss of personal independence in daily activities<br> Hospitalisation<br> Prescribed underdose; <b>prescribed overdose</b> | Hypersomnia; sleep disorder; insomnia<br>Fatigue; asthenia; feeling abnormal<br>Constipation; <b>abdominal pain</b><br>Decreased appetite<br>Panick attack; stress; bipolar disorder; crying; depressed mood; depression; apathy; mood swings; mania; <b>affective disorder</b><br>Aggression; anger<br>Psychomotor hyperactivity; restlessness; agitation<br>Abnormal behaviour; thinking abnormal<br>Myalgia; <b>arthralgia; back pain</b><br>Drug dependence; dependence<br>Disturbance in attention; <b>amnesia; cognitive disorder</b><br>Hallucination, auditory; paranoia<br>Paraphilia; stereotypy; kleptomania; poriomania; <b>overwork; pyromania</b><br><b>Cough</b><br>Loss of personal independence in daily activities<br>Hospitalisation<br>Prescribed underdose; <b>incorrect dose administered</b> |
|  Blood triglycerides increased; low density lipoprotein increased; blood cholesterol increased; blood glucose increased; alanine aminotransferase increased                                                                                                                                                                                                                                                                                                                                                                                                                                                                                                                                                                                                                                                                                                                                                                                                                                                                                                                                                                                                                                                                                                                                                                                                                                                                                                                                                                                                                | Blood triglycerides increased; low density lipoprotein increased; blood cholesterol increased; blood glucose increased; alanine aminotransferase increased                                                                                                                                                                                                                                                                                                                                                                                                                                                                                                                                                                                                                                                                                                                                                                                                                                                                                                                                                                      | Blood triglycerides increased; low density lipoprotein increased; blood cholesterol increased; blood glucose increased; alanine aminotransferase increased; <b>hunger; sleep apnoea syndrome; gastrointestinal surgery</b>                                                                                                                                                                                                                                                                                                                                                                                                                                                                                                                                                                                          |
|  Fear; <b>affective disorder</b><br> Personal relationship issue; social problem<br> Mental impairment                                                                                                                                                                                                                                                                                                                                                                                                                                                                                                                                                                                                                                                                                                                                                                                                                                                                                                                                                                                                                                                                                                                                                                                                                                                                                               | Fear<br>Personal relationship issue; social problem; <b>theft; shoplifting; Disability;</b> economic problem; bankruptcy; divorced; <b>homeless; loss of employment</b><br>Mental impairment                                                                                                                                                                                                                                                                                                                                                                                                                                                                                                                                                                                                                                                                                                                                                                                                                                                                                                                                    | Fear<br>Personal relationship issue; social problem; <b>theft; shoplifting; Disability;</b> economic problem; bankruptcy; divorced; <b>homeless; loss of employment</b><br>Mental impairment                                                                                                                                                                                                                                                                                                                                                                                                                                                                                                                                                                                                                        |

|                                                                                                                                                                                                                                                                                                                                                                                                                                                                                                                                                                                                                                                                                                                                                                                                                                                                                                                                                                                                                                                                                                                                                                                                                                                                                                                                                                                                                                                    |                                                                                                                                                                                                                                                                                                                                                                                                                                                                                                              |                                                                                                                                                                                                                                                                                                                                                                                                                 |
|----------------------------------------------------------------------------------------------------------------------------------------------------------------------------------------------------------------------------------------------------------------------------------------------------------------------------------------------------------------------------------------------------------------------------------------------------------------------------------------------------------------------------------------------------------------------------------------------------------------------------------------------------------------------------------------------------------------------------------------------------------------------------------------------------------------------------------------------------------------------------------------------------------------------------------------------------------------------------------------------------------------------------------------------------------------------------------------------------------------------------------------------------------------------------------------------------------------------------------------------------------------------------------------------------------------------------------------------------------------------------------------------------------------------------------------------------|--------------------------------------------------------------------------------------------------------------------------------------------------------------------------------------------------------------------------------------------------------------------------------------------------------------------------------------------------------------------------------------------------------------------------------------------------------------------------------------------------------------|-----------------------------------------------------------------------------------------------------------------------------------------------------------------------------------------------------------------------------------------------------------------------------------------------------------------------------------------------------------------------------------------------------------------|
|  Pain<br> Emotional distress; anhedonia; neuropsychiatric symptoms; anxiety<br> Mental disorder<br> Injury; brain injury<br> Disability; economic problem; bankruptcy; divorced; homeless; loss of employment<br><b>impulsivity</b> Gambling disorder; compulsive shopping; body-focused disorder; compulsive hoarding; hypersexuality; impulsivity<br> Unintended pregnancy; sexual dysfunction; psychosexual disorder; sexually transmitted disease<br> Obsessive-compulsive disorder<br> Eating disorder; gastrointestinal surgery<br> Condition aggravated<br> Product used in unapproved indication | Pain<br>Emotional distress; anhedonia; neuropsychiatric symptoms; anxiety<br>Mental disorder<br>Injury; brain injury<br>Gambling disorder; compulsive shopping; body-focused disorder; compulsive hoarding; hypersexuality; <b>impulsivity</b><br>Unintended pregnancy; sexual dysfunction; psychosexual disorder; sexually transmitted disease<br><b>Obsessive-compulsive disorder</b><br>Eating disorder; <b>gastrointestinal surgery</b><br>Condition aggravated<br>Product used in unapproved indication | Pain<br>Emotional distress; anhedonia; neuropsychiatric symptoms; anxiety<br>Mental disorder<br>Injury; brain injury<br>Gambling disorder; compulsive shopping; body-focused disorder; compulsive hoarding; hypersexuality<br>Unintended pregnancy; sexual dysfunction; psychosexual disorder; sexually transmitted disease<br>Eating disorder<br>Condition aggravated<br>Product used in unapproved indication |
|  <b>Theft; shoplifting</b>                                                                                                                                                                                                                                                                                                                                                                                                                                                                                                                                                                                                                                                                                                                                                                                                                                                                                                                                                                                                                                                                                                                                                                                                                                                                                                                                      |                                                                                                                                                                                                                                                                                                                                                                                                                                                                                                              |                                                                                                                                                                                                                                                                                                                                                                                                                 |
|  <b>Suicidal ideation; suicide attempt</b>                                                                                                                                                                                                                                                                                                                                                                                                                                                                                                                                                                                                                                                                                                                                                                                                                                                                                                                                                                                                                                                                                                                                                                                                                                                                                                                      | <b>Suicidal ideation; suicide attempt</b>                                                                                                                                                                                                                                                                                                                                                                                                                                                                    | <b>Suicidal ideation</b>                                                                                                                                                                                                                                                                                                                                                                                        |
|  Therapeutic product effect incomplete; therapeutic product effect variable; antipsychotic drug level below therapeutic; toxicity to various agents<br> Leukopenia<br> Euphoric mood                                                                                                                                                                                                                                                                                                                                                                                                                                                                                                                                                                                                                                                                                                                                                                                                                                                                                                                                                                                                      | Therapeutic product effect incomplete; therapeutic product effect variable; antipsychotic drug level below therapeutic; toxicity to various agents; <b>prescribed overdose</b><br>Leukopenia<br>Euphoric mood                                                                                                                                                                                                                                                                                                | Therapeutic product effect incomplete; therapeutic product effect variable; antipsychotic drug level below therapeutic; toxicity to various agents; <b>prescribed overdose</b><br>Leukopenia<br>Euphoric mood                                                                                                                                                                                                   |
|  Hunger; hyperphagia; weight increased                                                                                                                                                                                                                                                                                                                                                                                                                                                                                                                                                                                                                                                                                                                                                                                                                                                                                                                                                                                                                                                                                                                                                                                                                                                                                                                          | Hunger; hyperphagia; weight increased; obesity; dyslipidaemia; hypertension; <b>sleep apnoea syndrome</b>                                                                                                                                                                                                                                                                                                                                                                                                    | Obesity; dyslipidaemia; hypertension                                                                                                                                                                                                                                                                                                                                                                            |
|  Obesity; dyslipidaemia; hypertension; sleep apnoea syndrome<br> Akathisia<br> Sedation<br> Amnesia; cognitive disorder                                                                                                                                                                                                                                                                                                                                                                                                                                                                                                                                                                                                                                                                                                                                                                                                                                                                                                                                                                                | Akathisia<br><br><b>impulsivity</b> Impulsivity                                                                                                                                                                                                                                                                                                                                                                                                                                                              | Akathisia<br><br>Impulsivity                                                                                                                                                                                                                                                                                                                                                                                    |
|                                                                                                                                                                                                                                                                                                                                                                                                                                                                                                                                                                                                                                                                                                                                                                                                                                                                                                                                                                                                                                                                                                                                                                                                                                                                                                                                                                                                                                                    |                                                                                                                                                                                                                                                                                                                                                                                                                                                                                                              |  <b>Suicide attempt</b><br> <b>Obsessive-compulsive disorder</b>                                                                                                                                                                      |

|                                                                                                                                                                                                                                                                                                                                                                                                                                                                                                                                                                                                                                                                                                                                                                                                                                                                                                                |                                                                                                                                                                                                                                                                                                                                                                                                                                                                                                                        |                                                                                                                                                                                                                                                                                                                                                                                                   |
|----------------------------------------------------------------------------------------------------------------------------------------------------------------------------------------------------------------------------------------------------------------------------------------------------------------------------------------------------------------------------------------------------------------------------------------------------------------------------------------------------------------------------------------------------------------------------------------------------------------------------------------------------------------------------------------------------------------------------------------------------------------------------------------------------------------------------------------------------------------------------------------------------------------|------------------------------------------------------------------------------------------------------------------------------------------------------------------------------------------------------------------------------------------------------------------------------------------------------------------------------------------------------------------------------------------------------------------------------------------------------------------------------------------------------------------------|---------------------------------------------------------------------------------------------------------------------------------------------------------------------------------------------------------------------------------------------------------------------------------------------------------------------------------------------------------------------------------------------------|
|  Diarrhoea; dyspepsia; gastroesophageal reflux disease; abdominal pain<br> Hypoaesthesia<br> Poor quality sleep; nightmare<br> Hyperidrosis<br> Migraine<br> Muscle twitching; back pain; arthralgia<br> Personality disorder<br> Cough | Diarrhoea; dyspepsia; gastroesophageal reflux disease<br>Hypoaesthesia<br>Poor quality sleep; nightmare; sedation<br>Hyperidrosis<br>Migraine; headache<br>Muscle twitching<br>Personality disorder<br><br> Weight decreased<br> Memory impairment<br> Irritability | Diarrhoea; dyspepsia; gastroesophageal reflux disease<br>Hypoaesthesia<br>Poor quality sleep; nightmare; sedation; somnolence<br>Hyperidrosis<br>Migraine; headache<br>Muscle twitching<br>Personality disorder<br><br>Weight decreased<br>Memory impairment<br>Irritability<br> Hyperphagia; weight increased |
| <p><b>Isolated nodes:</b> pyromania; overwork; incorrect dose administered; prescribed overdose; prescribed underdose; poriomania; dependence; thinking abnormal; hospitalisation; paranoia; kleptomania; loss of personal independence in daily activities</p>                                                                                                                                                                                                                                                                                                                                                                                                                                                                                                                                                                                                                                                | <p><b>Isolated nodes:</b> pyromania; overwork; incorrect dose administered</p>                                                                                                                                                                                                                                                                                                                                                                                                                                         |                                                                                                                                                                                                                                                                                                                                                                                                   |

**Table S11. Pramipexole clusters obtained from Ising and Phi estimation.** Phi and Ising clusters are shown side by side. Ising clusters are color-coded, to show the similarities with Phi.

| Ising                                                                                                                                                                                                                                                                                                                                                                                                                                                                                                                               | PHI                                                                                                                                                                                                                                                                                                       | PPMI                                                                                                                                                                                                                                                                                                                                                        |
|-------------------------------------------------------------------------------------------------------------------------------------------------------------------------------------------------------------------------------------------------------------------------------------------------------------------------------------------------------------------------------------------------------------------------------------------------------------------------------------------------------------------------------------|-----------------------------------------------------------------------------------------------------------------------------------------------------------------------------------------------------------------------------------------------------------------------------------------------------------|-------------------------------------------------------------------------------------------------------------------------------------------------------------------------------------------------------------------------------------------------------------------------------------------------------------------------------------------------------------|
| <p><b>impulsivity</b> Gambling disorder; compulsive shopping</p>  Anxiety; depression; fear; emotional distress; stress<br> Pain<br> Obsessive-compulsive disorder<br> Suicidal ideation        | <p>Gambling disorder</p> <p>Anxiety; depression; fear; emotional distress; stress; major depression</p> <p>Pain</p> <p>Obsessive-compulsive disorder</p> <p>Suicidal ideation; <b>suicide attempt</b></p>  <b>Injury</b> | <p>Gambling disorder; compulsive shopping</p> <p>Depression; fear; emotional distress; stress</p> <p>Pain</p> <p>Obsessive-compulsive disorder</p> <p>Suicidal ideation</p>                                                                                                                                                                                 |
|  <b>Hyperphagia; weight increased</b>                                                                                                                                                                                                                                                                                                                                                                                                              | <b>Hyperphagia; weight increased</b>                                                                                                                                                                                                                                                                      | <b>Hyperphagia; weight increased</b>                                                                                                                                                                                                                                                                                                                        |
|  <b>Sleep disorder; somnolence; insomnia; disturbance in attention</b>                                                                                                                                                                                                                                                                                                                                                                             | <b>Sleep disorder; somnolence</b>                                                                                                                                                                                                                                                                         |                                                                                                                                                                                                                                                                                                                                                             |
|  Drug withdrawal syndrome; on and off phenomenon; dyskinesia; dopamine dysregulation syndrome<br><p><b>impulsivity</b> Stereotypy; impulsivity; paraphilia</p>                                                                                                                                                                                                                                                                                     | <p>Drug withdrawal syndrome; on and off phenomenon; dyskinesia; dopamine dysregulation syndrome; <b>drug dependence; drug abuse</b></p> <p>Stereotypy; impulsivity; paraphilia</p>                                                                                                                        | <p>Drug withdrawal syndrome; on and off phenomenon; dyskinesia; dopamine dysregulation syndrome; <b>drug dependence; drug abuse; dependence</b></p> <p>Stereotypy; impulsivity; paraphilia; gaming disorder; poriomania; pyromania</p>                                                                                                                      |
|  Drug dependence; drug abuse                                                                                                                                                                                                                                                                                                                                                                                                                     | <p>Aggression</p>                                                                                                                                                                                                                                                                                         | <p>Aggression</p>                                                                                                                                                                                                                                                                                                                                           |
|  Aggression                                                                                                                                                                                                                                                                                                                                                                                                                                      | <p>Compulsive hoarding</p>                                                                                                                                                                                                                                                                                | <p>Compulsive hoarding</p>                                                                                                                                                                                                                                                                                                                                  |
| <p><b>impulsivity</b> Compulsive hoarding</p>  Paranoia; hallucination, visual; psychotic disorder<br> Psychomotor hyperactivity; restlessness<br> Hypomania; mania<br> Eating disorder | <p>Paranoia; hallucination, visual; psychotic disorder</p> <p>Psychomotor hyperactivity; restlessness</p> <p>Hypomania; mania</p> <p>Eating disorder</p>                                                                                                                                                  | <p>Hallucination, visual</p> <p>Psychomotor hyperactivity; restlessness</p> <p>Eating disorder</p>                                                                                                                                                                                                                                                          |
|                                                                                                                                                                                                                                                                                                                                                                                                                                                                                                                                     |                                                                                                                                                                                                                                                                                                           |  <b>Economic problem; abnormal behaviour</b><br> <b>Injury</b><br> <b>Personality change</b> |

|                                                                                                                                                                                                                                                                                                                                                                                                                                                                                                                                                                                                                                                                |                                                                                                                                                                                |                                                                                                                                                                                                                                     |
|----------------------------------------------------------------------------------------------------------------------------------------------------------------------------------------------------------------------------------------------------------------------------------------------------------------------------------------------------------------------------------------------------------------------------------------------------------------------------------------------------------------------------------------------------------------------------------------------------------------------------------------------------------------|--------------------------------------------------------------------------------------------------------------------------------------------------------------------------------|-------------------------------------------------------------------------------------------------------------------------------------------------------------------------------------------------------------------------------------|
|                                                                                                                                                                                                                                                                                                                                                                                                                                                                                                                                                                                                                                                                |                                                                                                                                                                                |  Somnolence<br> Suicide attempt                                |
|  Bipolar disorder<br> Mental impairment; mental disorder<br> Abnormal behaviour<br> Economic problem<br> Product use in unapproved indication<br> Injury | Bipolar disorder; emotional disorder; apathy; crying<br>Mental impairment; mental disorder; cognitive disorder; disturbance in attention<br>Abnormal behaviour<br><br>Overdose | Bipolar disorder; emotional disorder; apathy; crying; anxiety<br>Mental impairment; mental disorder; cognitive disorder; disturbance in attention<br><br>Overdose                                                                   |
|  Anhedonia; depressed mood; emotional disorder; apathy<br> Cognitive disorder<br> Overdose<br> Suicide attempt<br> Delusion                                                                                                        |                                                                                                                                                                                |                                                                                                                                                                                                                                     |
|  Agitation<br> Crying<br> Irritability                                                                                                                                                                                                                                                                                                                                                                | Agitation<br><br> Insomnia                                                                  | Agitation<br><br>Insomnia                                                                                                                                                                                                           |
|  Jealous delusion; paranoia; hallucination, visual; psychotic disorder<br><b>impulsivity</b> Hypersexuality<br> Marital problem<br> Psychomotor hyperactivity<br> Hypomania; mania                                                                                                                                 | Jealous delusion<br><br>Hypersexuality; excessive exercise; compulsive shopping<br><br>Marital problem;<br><br>Anhedonia; depressed mood                                       | Jealous delusion; marital problem; paranoia; psychotic disorder; delusion<br><br>Hypersexuality; excessive exercise; <b>body-focused disorder; kleptomania</b><br><br>Hypomania; mania; anhedonia; depressed mood; major depression |

|                                                                                                                                                                                                                                                       |                                                                                                                                                                                                                                                                                                                                  |                                                                                                                                                                                                                                                                                                                                                                 |
|-------------------------------------------------------------------------------------------------------------------------------------------------------------------------------------------------------------------------------------------------------|----------------------------------------------------------------------------------------------------------------------------------------------------------------------------------------------------------------------------------------------------------------------------------------------------------------------------------|-----------------------------------------------------------------------------------------------------------------------------------------------------------------------------------------------------------------------------------------------------------------------------------------------------------------------------------------------------------------|
|                                                                                                                                                                                                                                                       |  Irritability; anger<br> Dependence; withdrawal syndrome<br> Thinking abnormal | Irritability; anger<br>Withdrawal syndrome<br>Thinking abnormal                                                                                                                                                                                                                                                                                                 |
| <b>impulsivity</b> body-focused disorder; kleptomania                                                                                                                                                                                                 | body-focused disorder; kleptomania                                                                                                                                                                                                                                                                                               |  Compulsions<br> Product use in unapproved indication<br> Sudden onset of sleep; <b>sleep disorder</b> |
| <b>Isolated nodes:</b> poriomania; compulsions; personality change; gaming disorder; eating disorder; sudden onset of sleep; restlessness; pyromania; thinking abnormal; withdrawal syndrome; excessive exercise; anger; dependence; major depression | <b>Isolated nodes:</b> poriomania; compulsions; personality change; gaming disorder                                                                                                                                                                                                                                              |                                                                                                                                                                                                                                                                                                                                                                 |

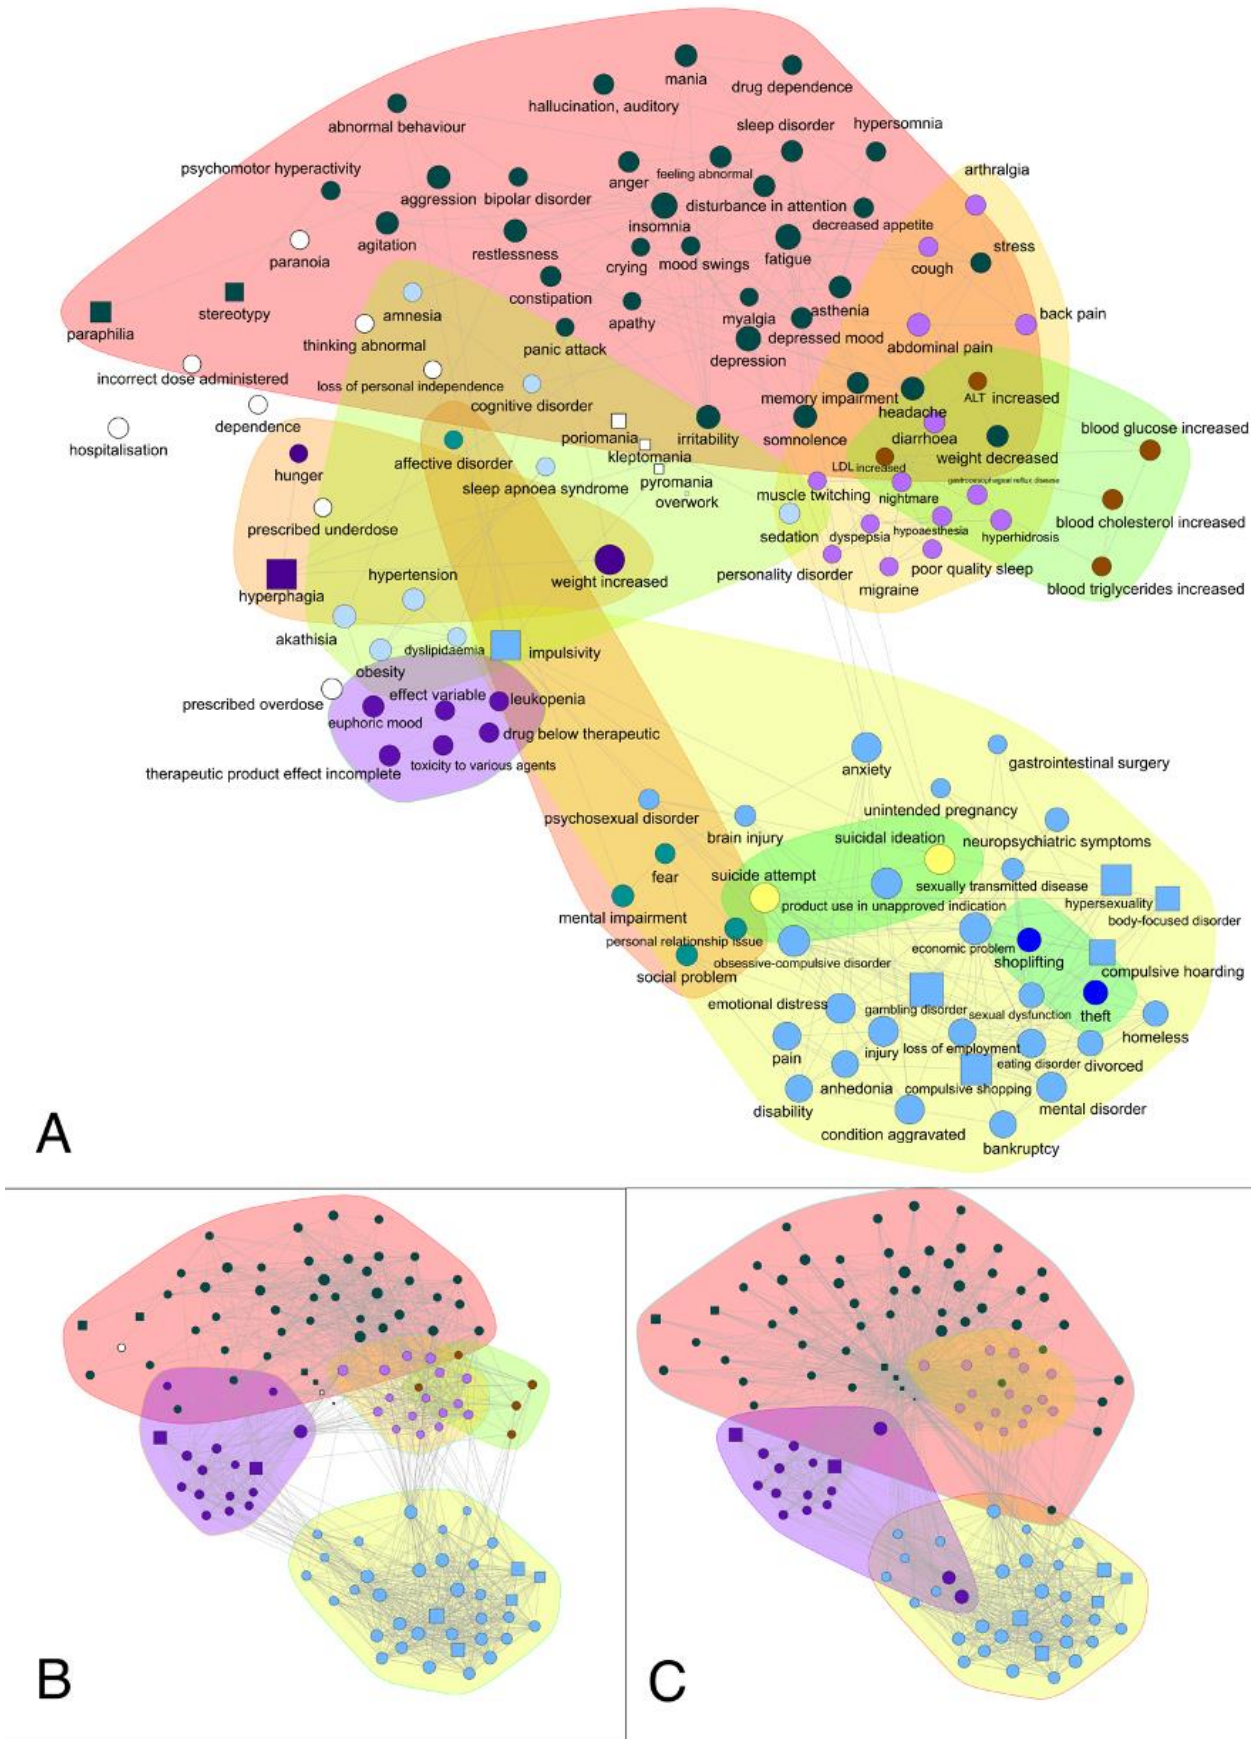

**Figure S1. The secondary impact of aripiprazole-induced pathologic impulsivity.** The network shows the events disproportionately reported with aripiprazole-related impulsivity. Impulsivity is shown as squares, other events as circles. Node colors and contours identify the clusters for the three methods: Ising (A), Phi (B) and PPMI (C). The layout is calculated using a spring model with, as weight, the average of the three weights calculated, after rescaling them from 0 to 1.

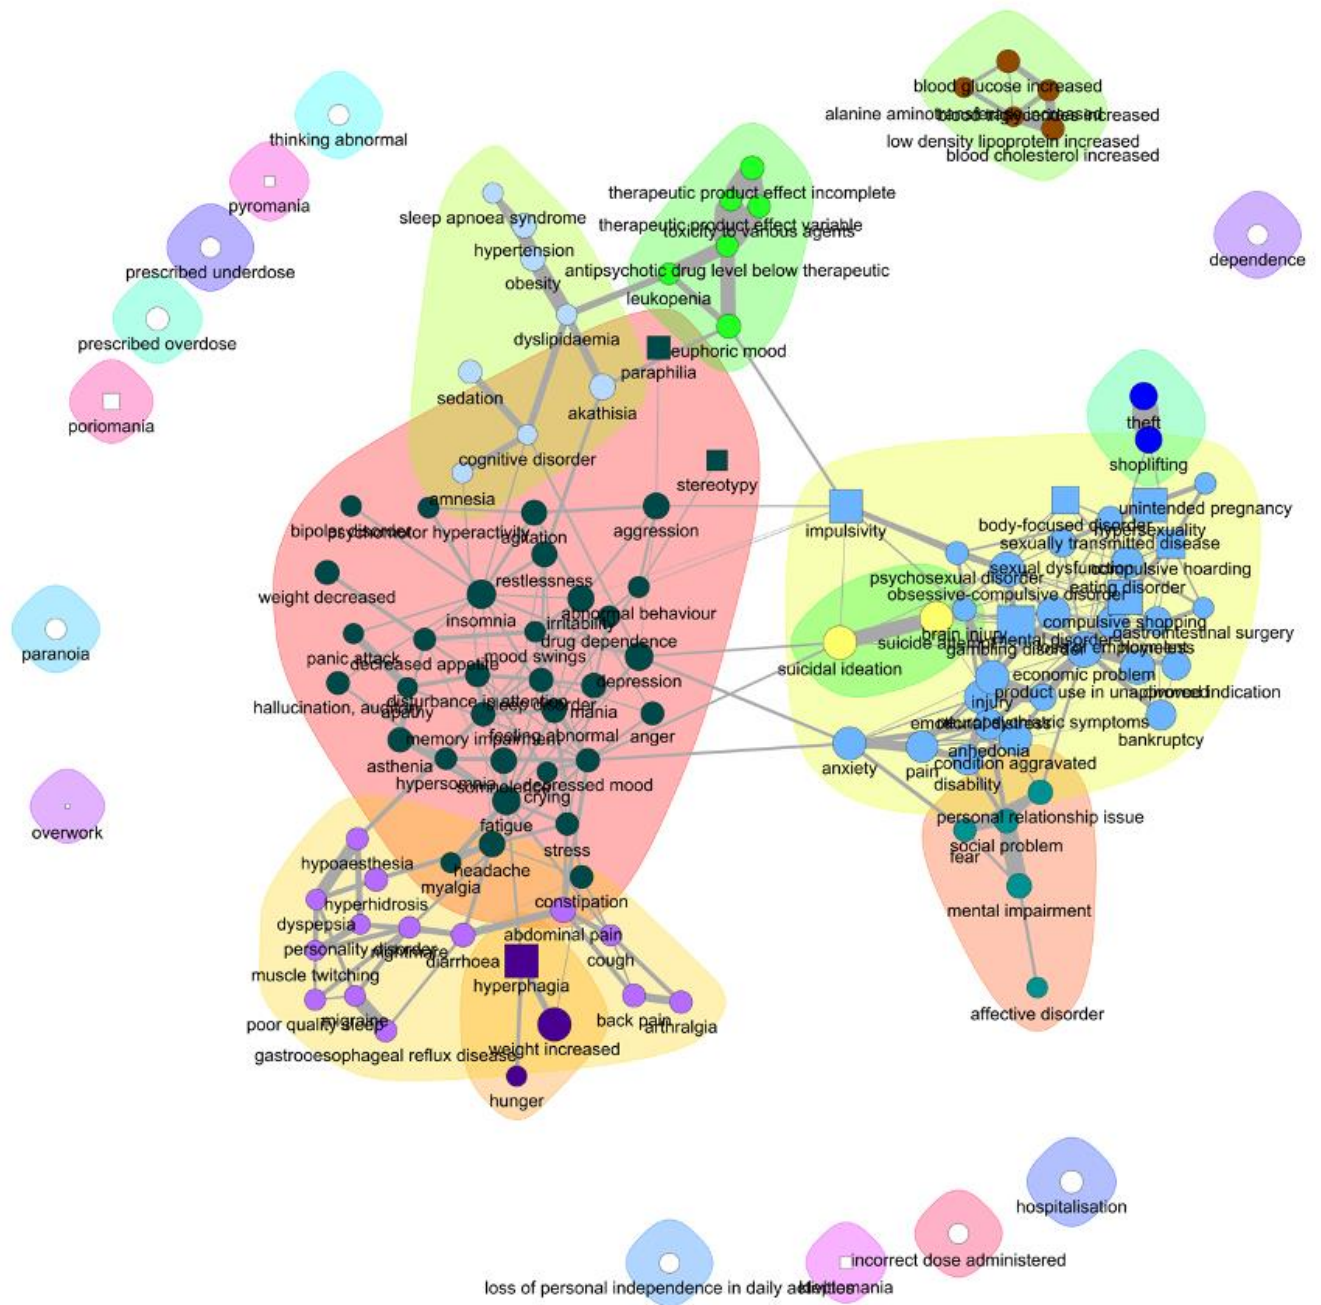

**Figure S2. The secondary impact of aripiprazole-induced pathologic impulsivity, Ising estimation.** The network shows the events disproportionately reported with aripiprazole-related impulsivity. Impulsivity is shown as squares, other events as circles. Node colors and contours identify the clusters for the Ising estimation. The layout is calculated using a spring model with, as weight, the links from the Ising.





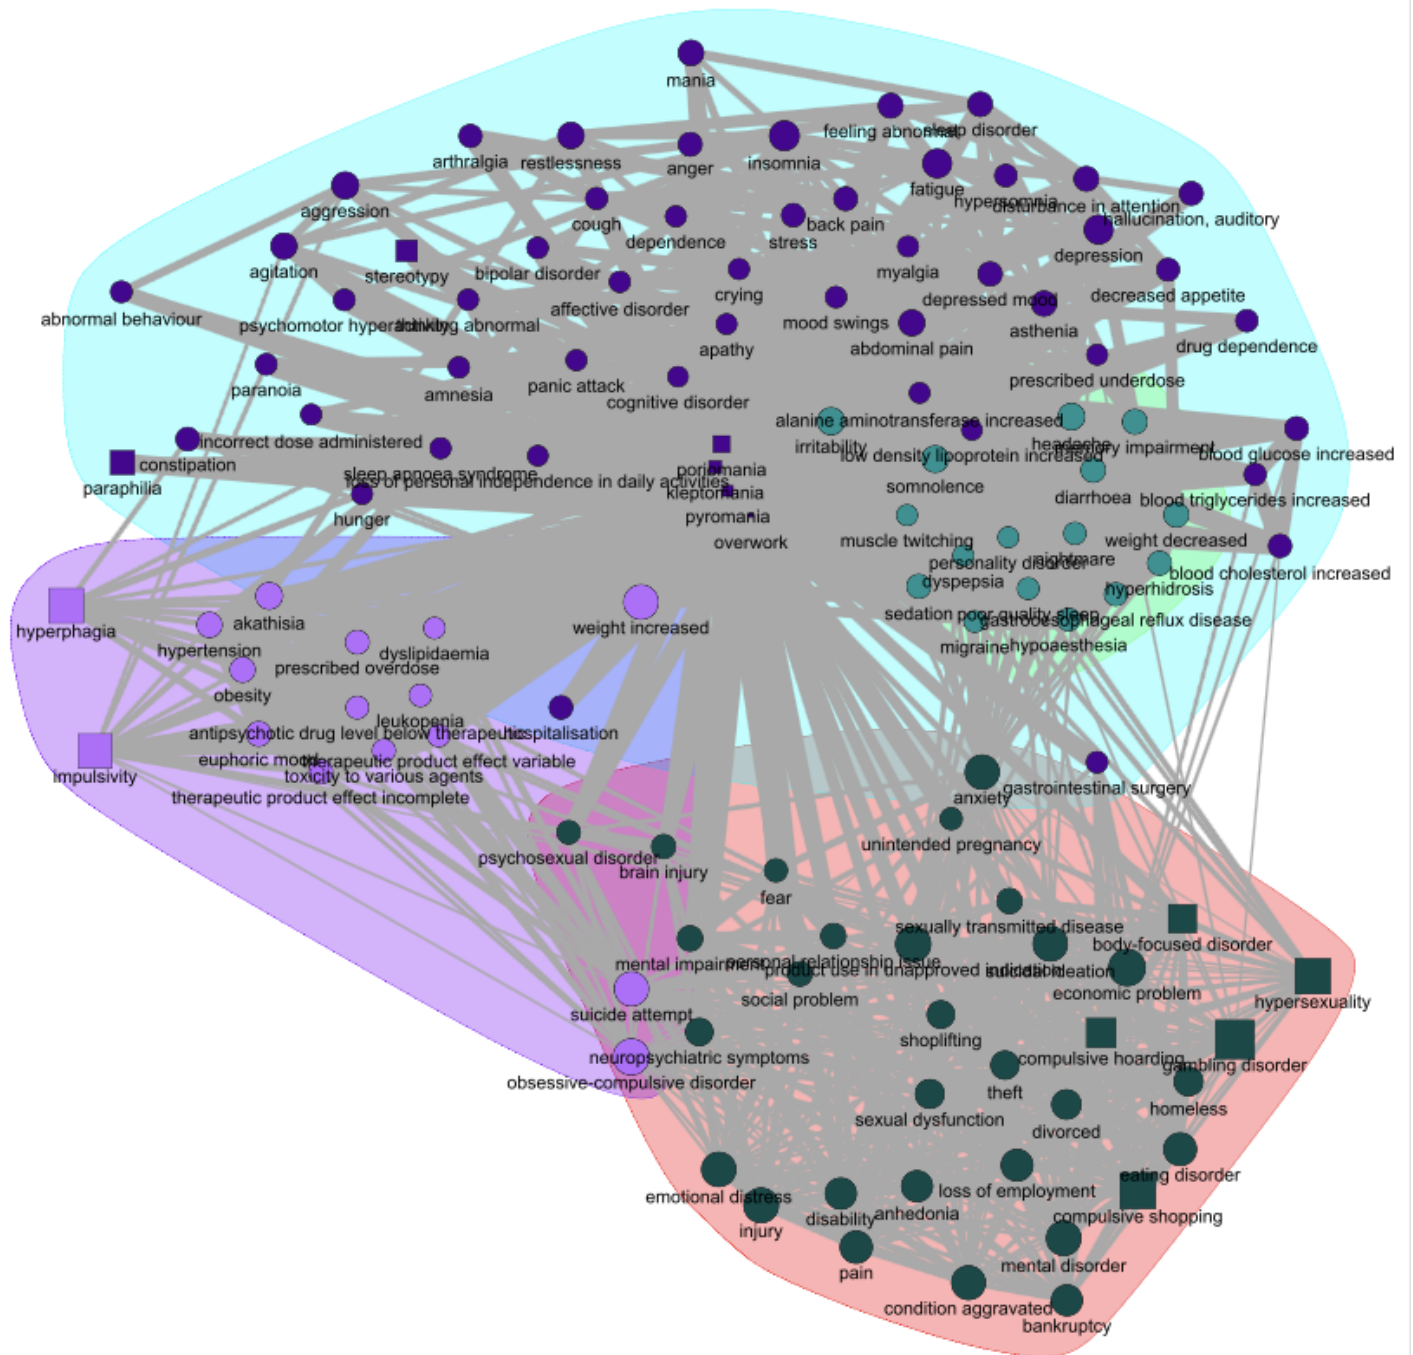

**Figure S4. The secondary impact of aripiprazole-induced pathologic impulsivity, PPMI estimation.** The network shows the events disproportionately reported with aripiprazole-related impulsivity. Impulsivity is shown as squares, other events as circles. Node colors and contours identify the clusters for the PPMI estimation. The layout is calculated using a spring model with, as weight, the links from the PPMI.

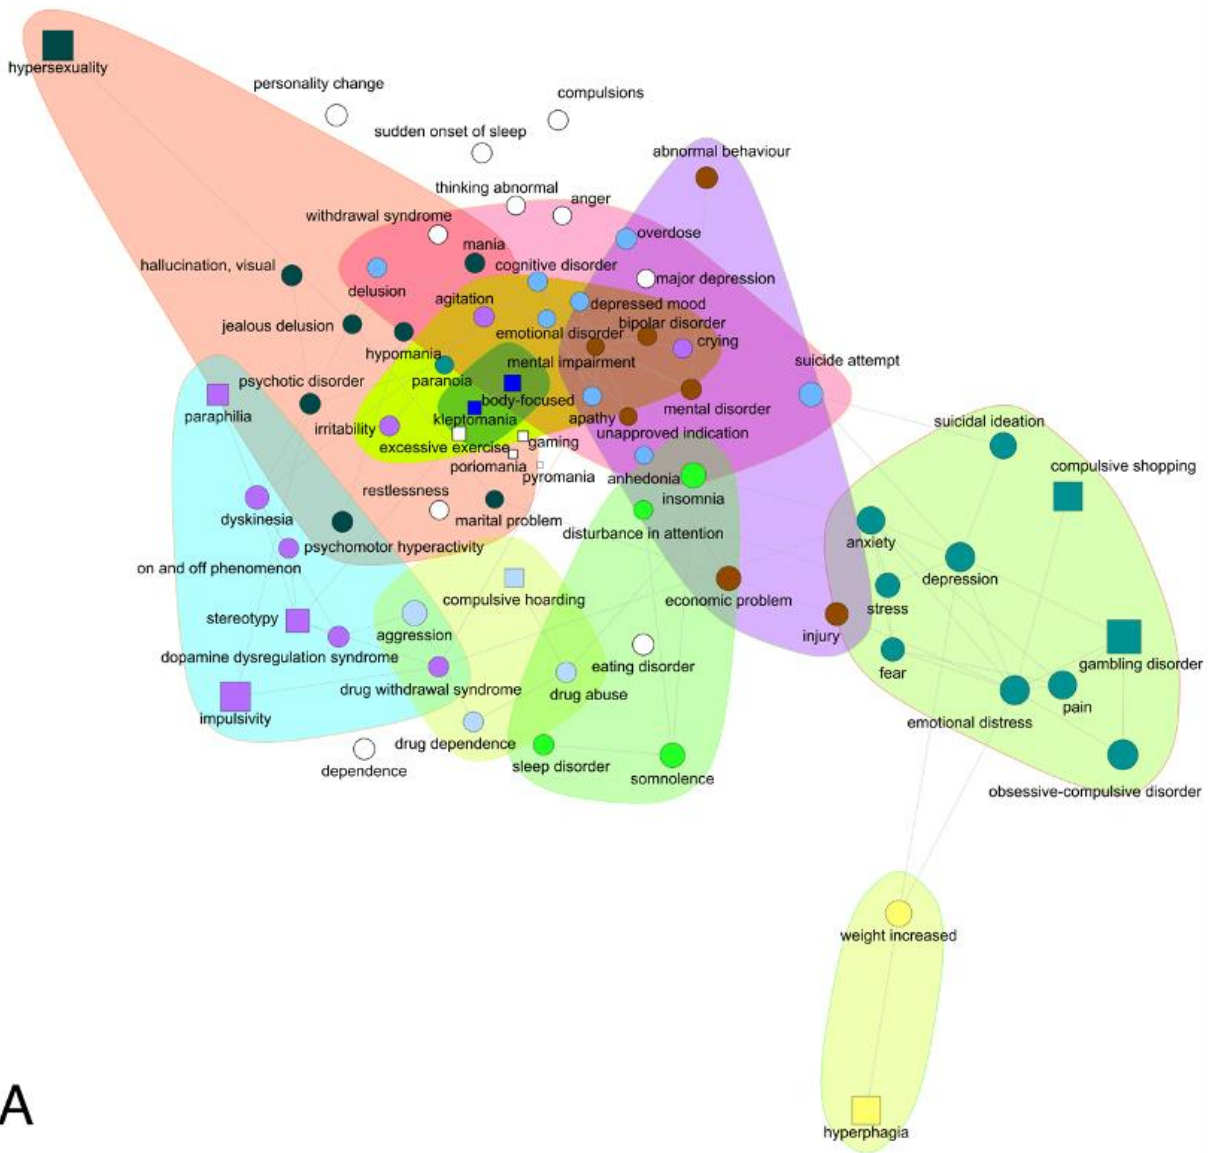

A

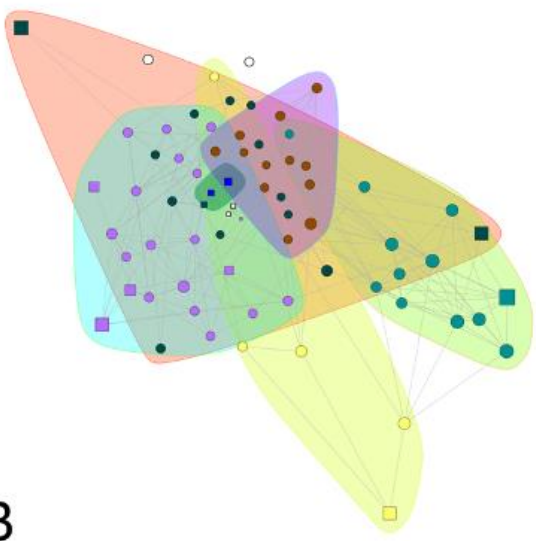

B

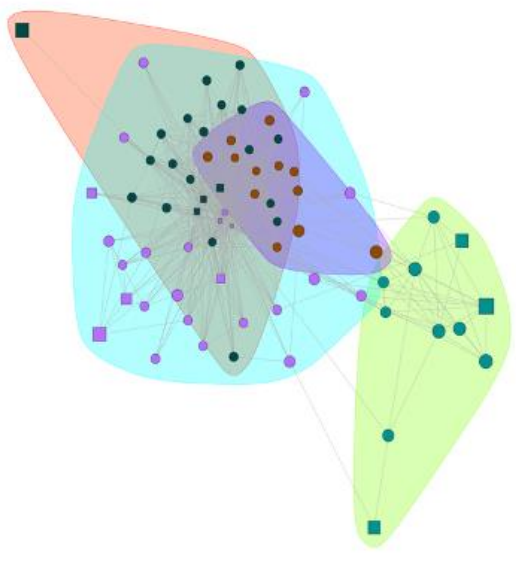

C

**Figure S5. The secondary impact of pramipexole-induced pathologic impulsivity.** The network shows the events disproportionately reported with pramipexole-related impulsivity. Impulsivity is shown as squares, other events as circles. Node colors and contours identify the clusters for the three methods: Ising (A), Phi (B) and PPMI (C). The layout is calculated using a spring model with, as weight, the average of the three weights calculated, after rescaling them from 0 to 1.



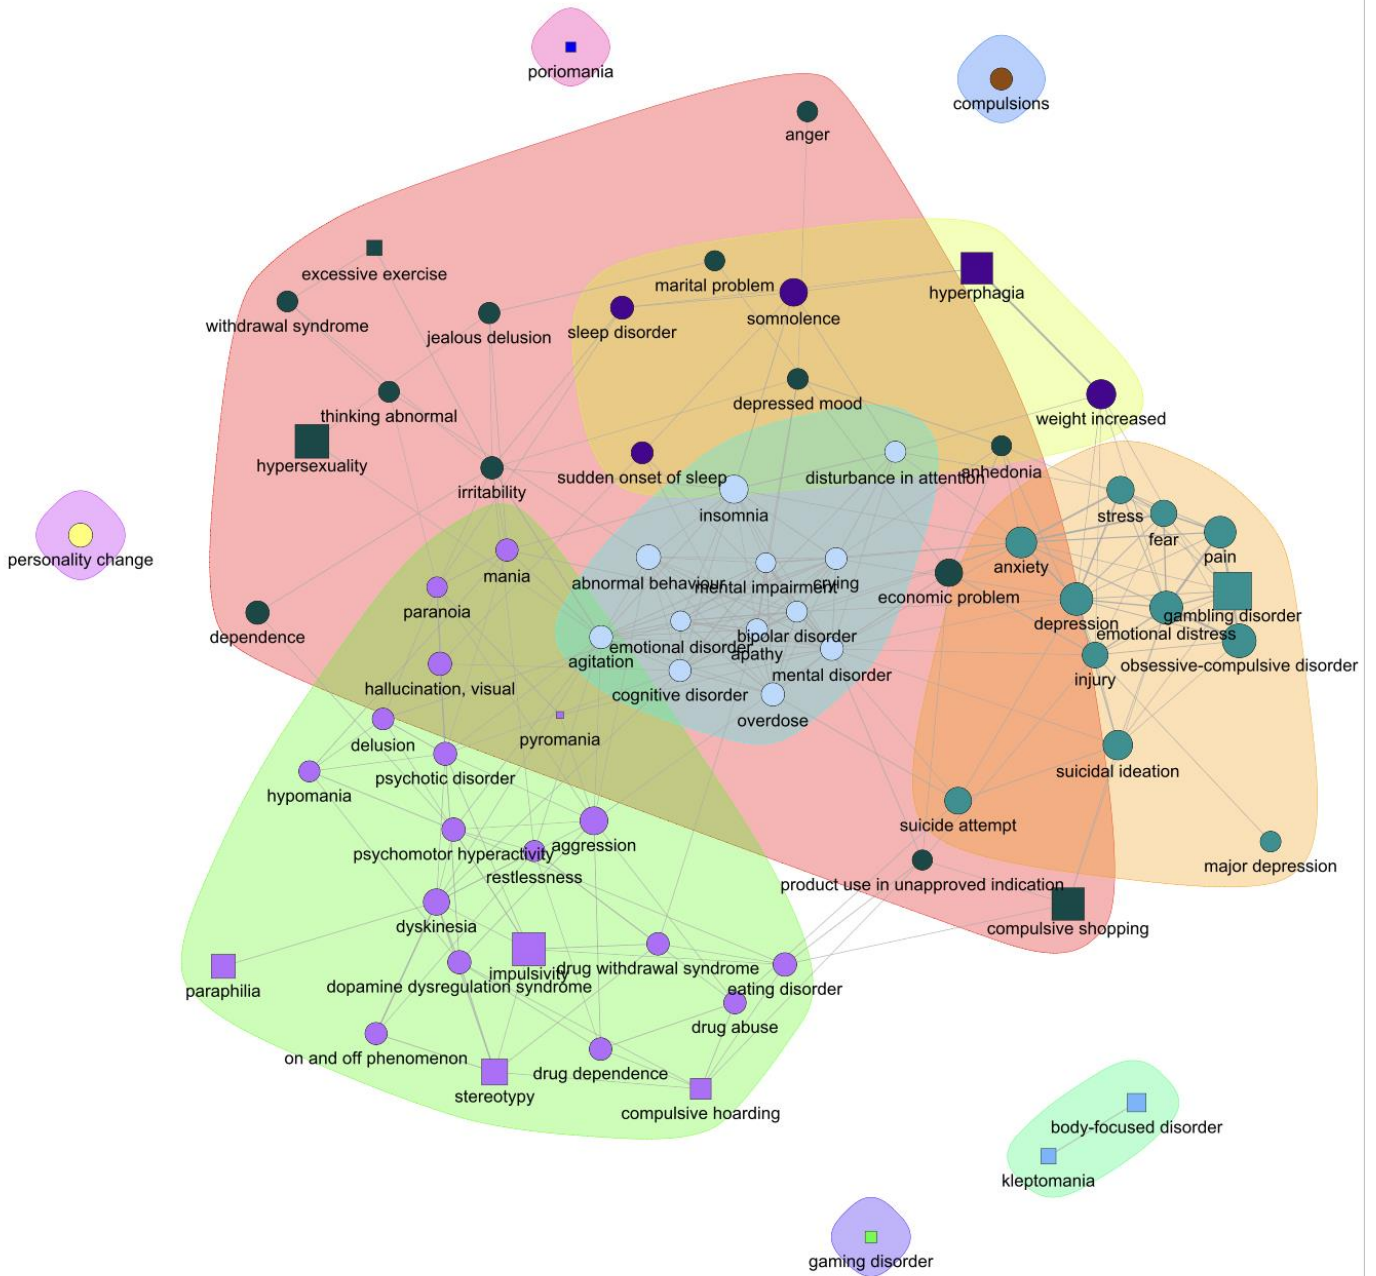

**Figure S7. The secondary impact of pramipexole-induced pathologic impulsivity, Phi estimation.** The network shows the events disproportionately reported with pramipexole-related impulsivity. Impulsivity is shown as squares, other events as circles. Node colors and contours identify the clusters for the Phi estimation. The layout is calculated using a spring model with, as weight, the links from the Phi.

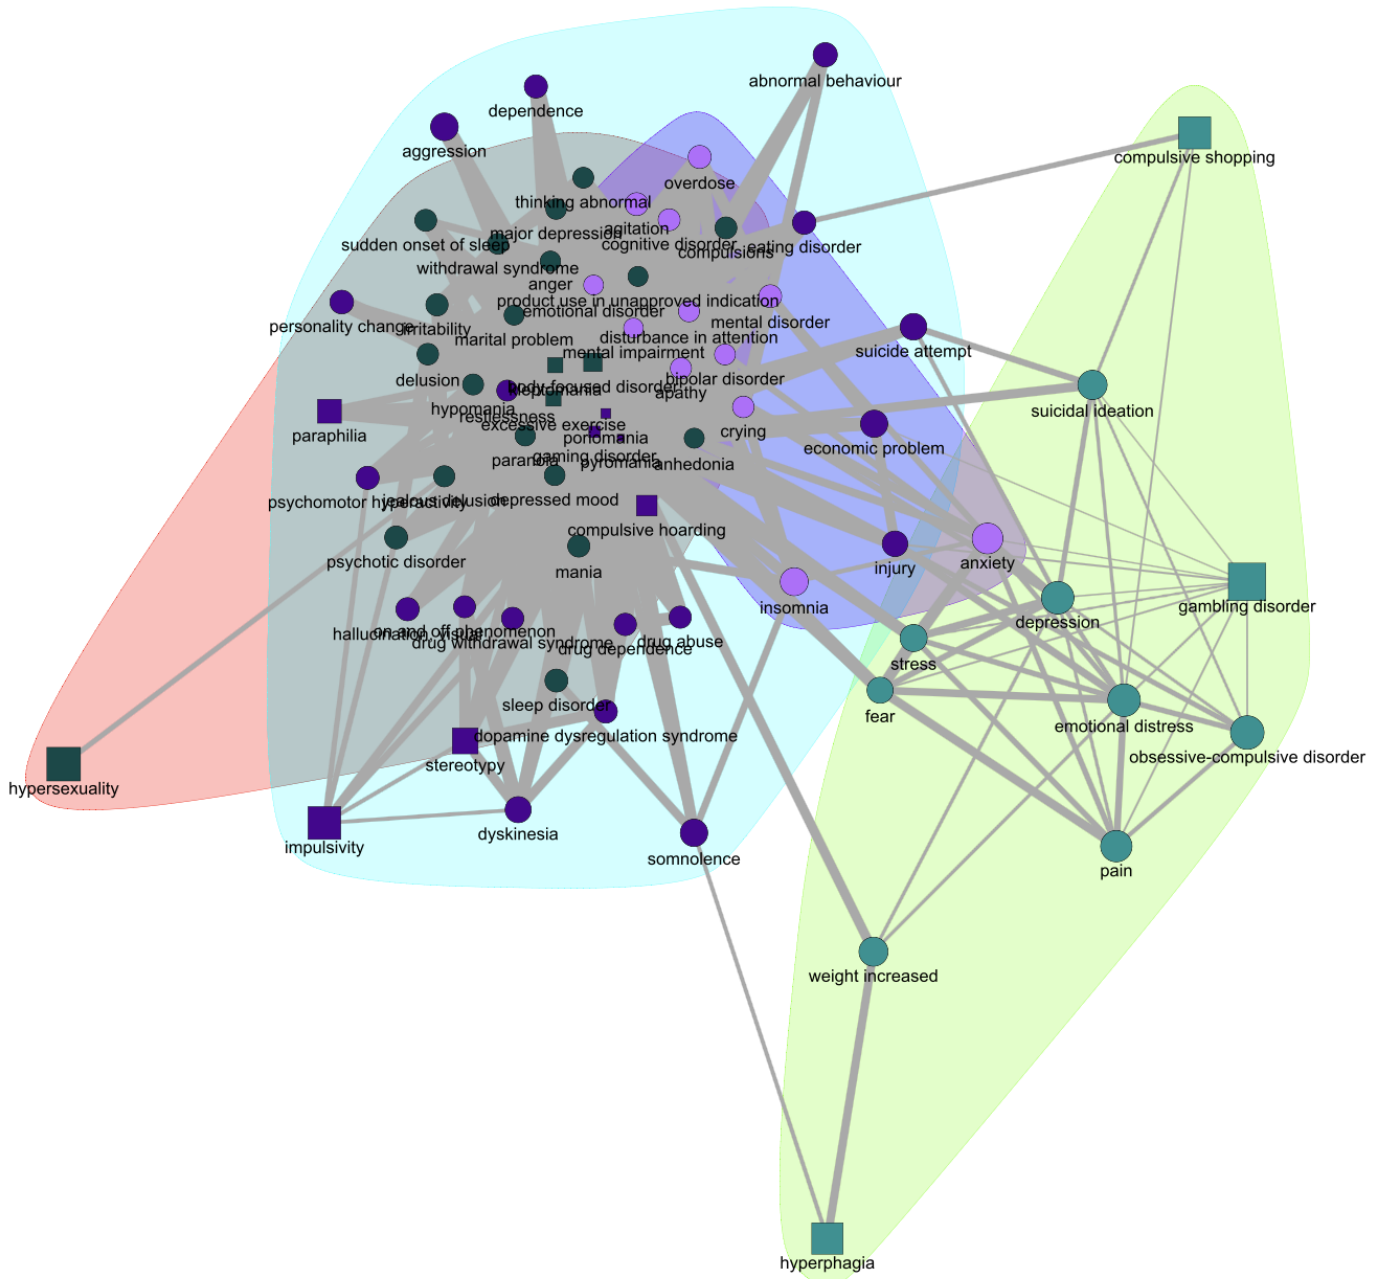

**Figure S8. The secondary impact of pramipexole-induced pathologic impulsivity, PPMI estimation.** The network shows the events disproportionately reported with pramipexole-related impulsivity. Impulsivity is shown as squares, other events as circles. Node colors and contours identify the clusters for the PPMI estimation. The layout is calculated using a spring model with, as weight, the links from the PPMI.

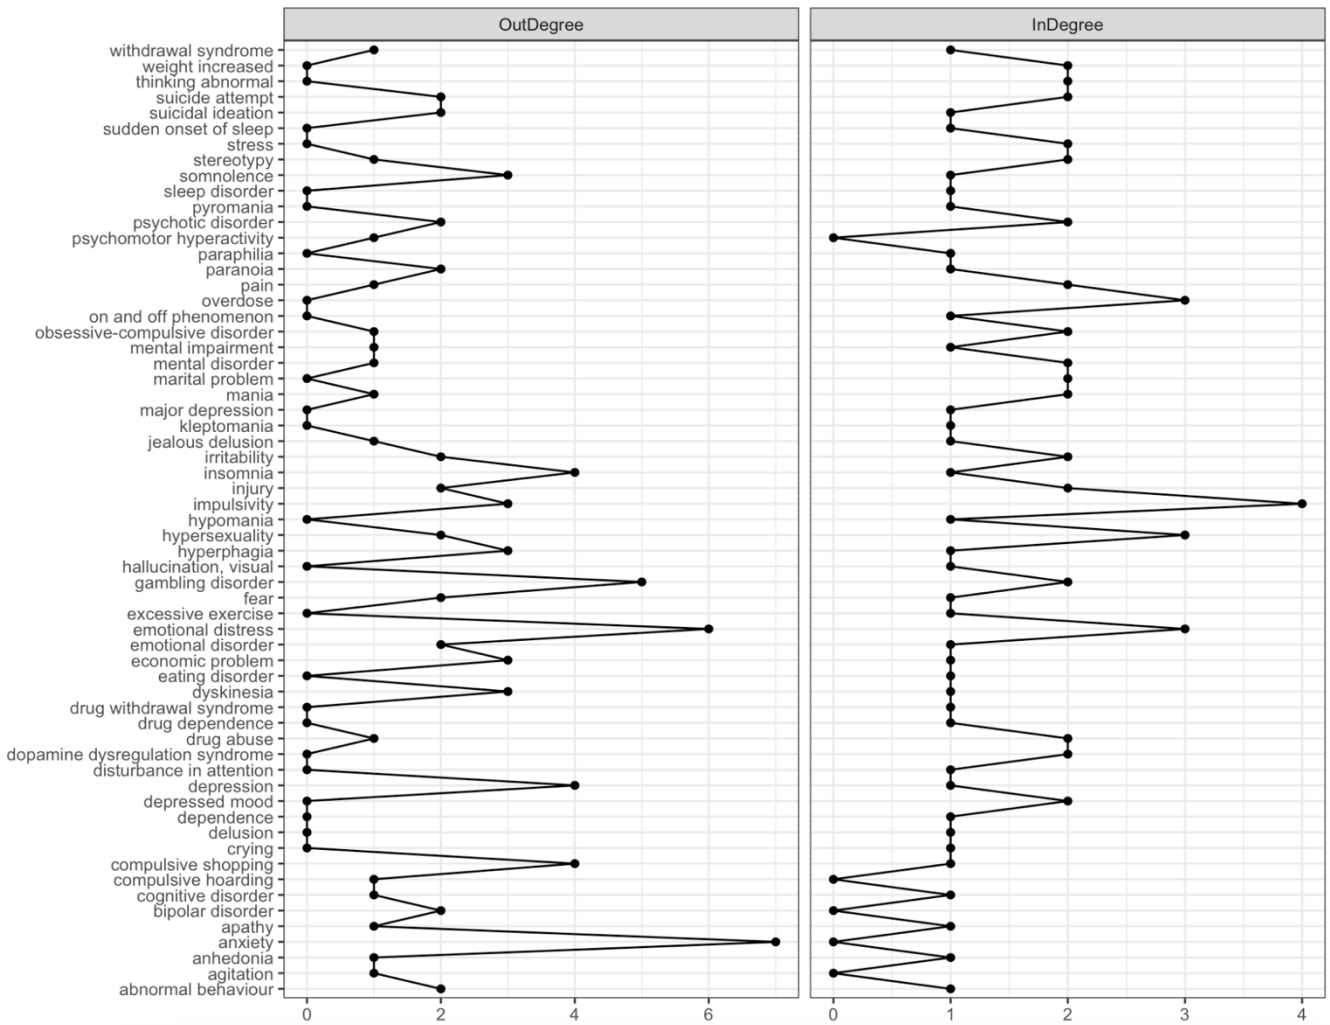

Figure S9. Degree centrality, pramipexole.

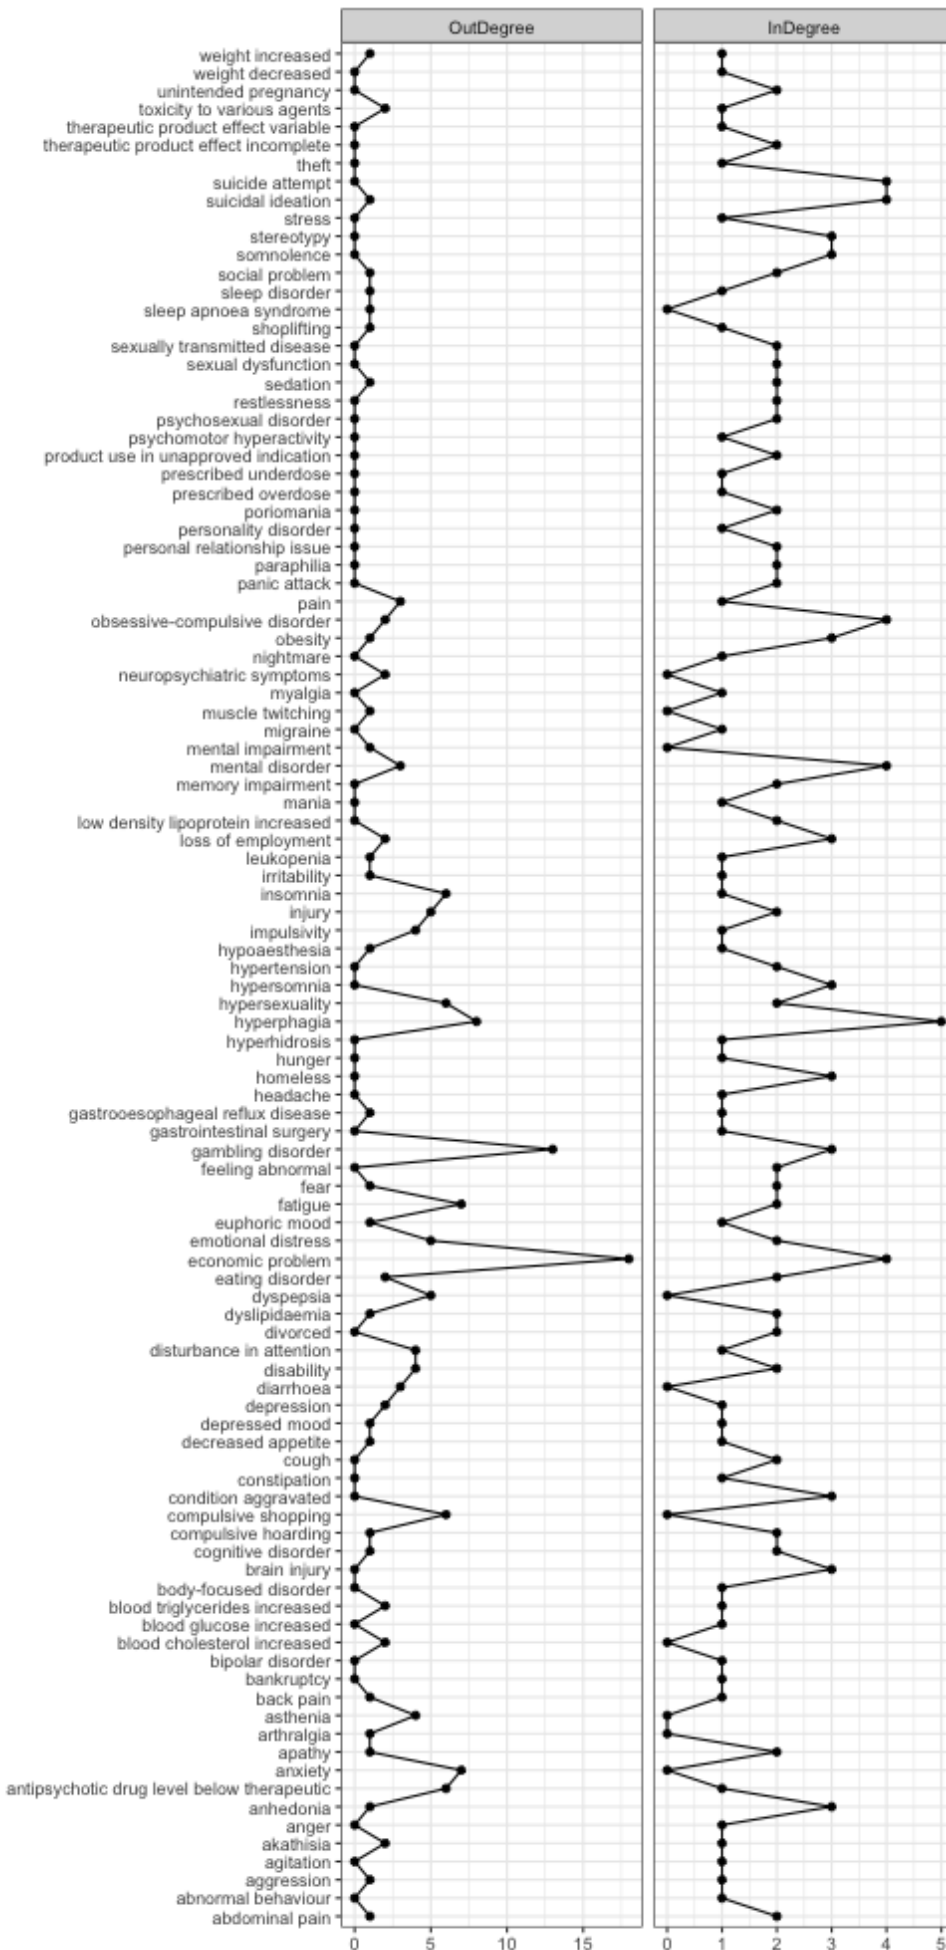

Figure S10. Degree centrality, aripiprazole.



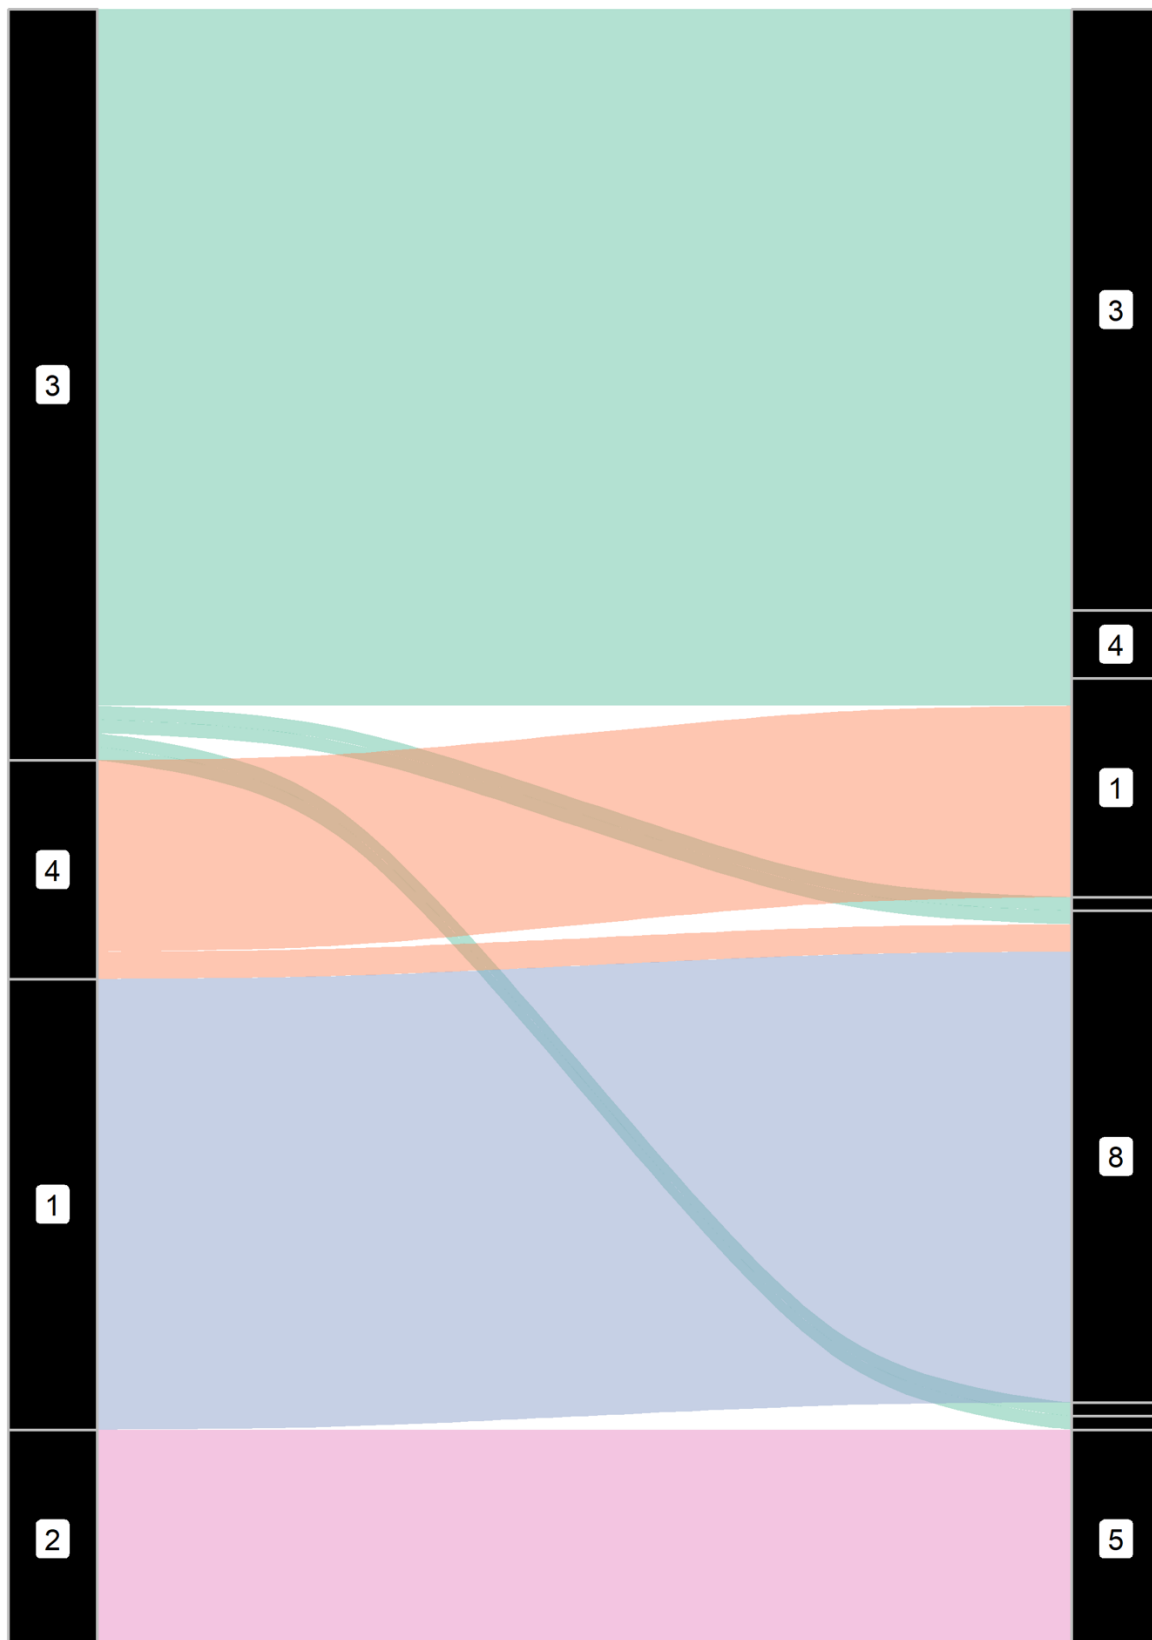

Clusters PPMI

Clusters PHI

Figure S11. Sankey showing comparison between clusters in PPMI and PHI, pramipexole.

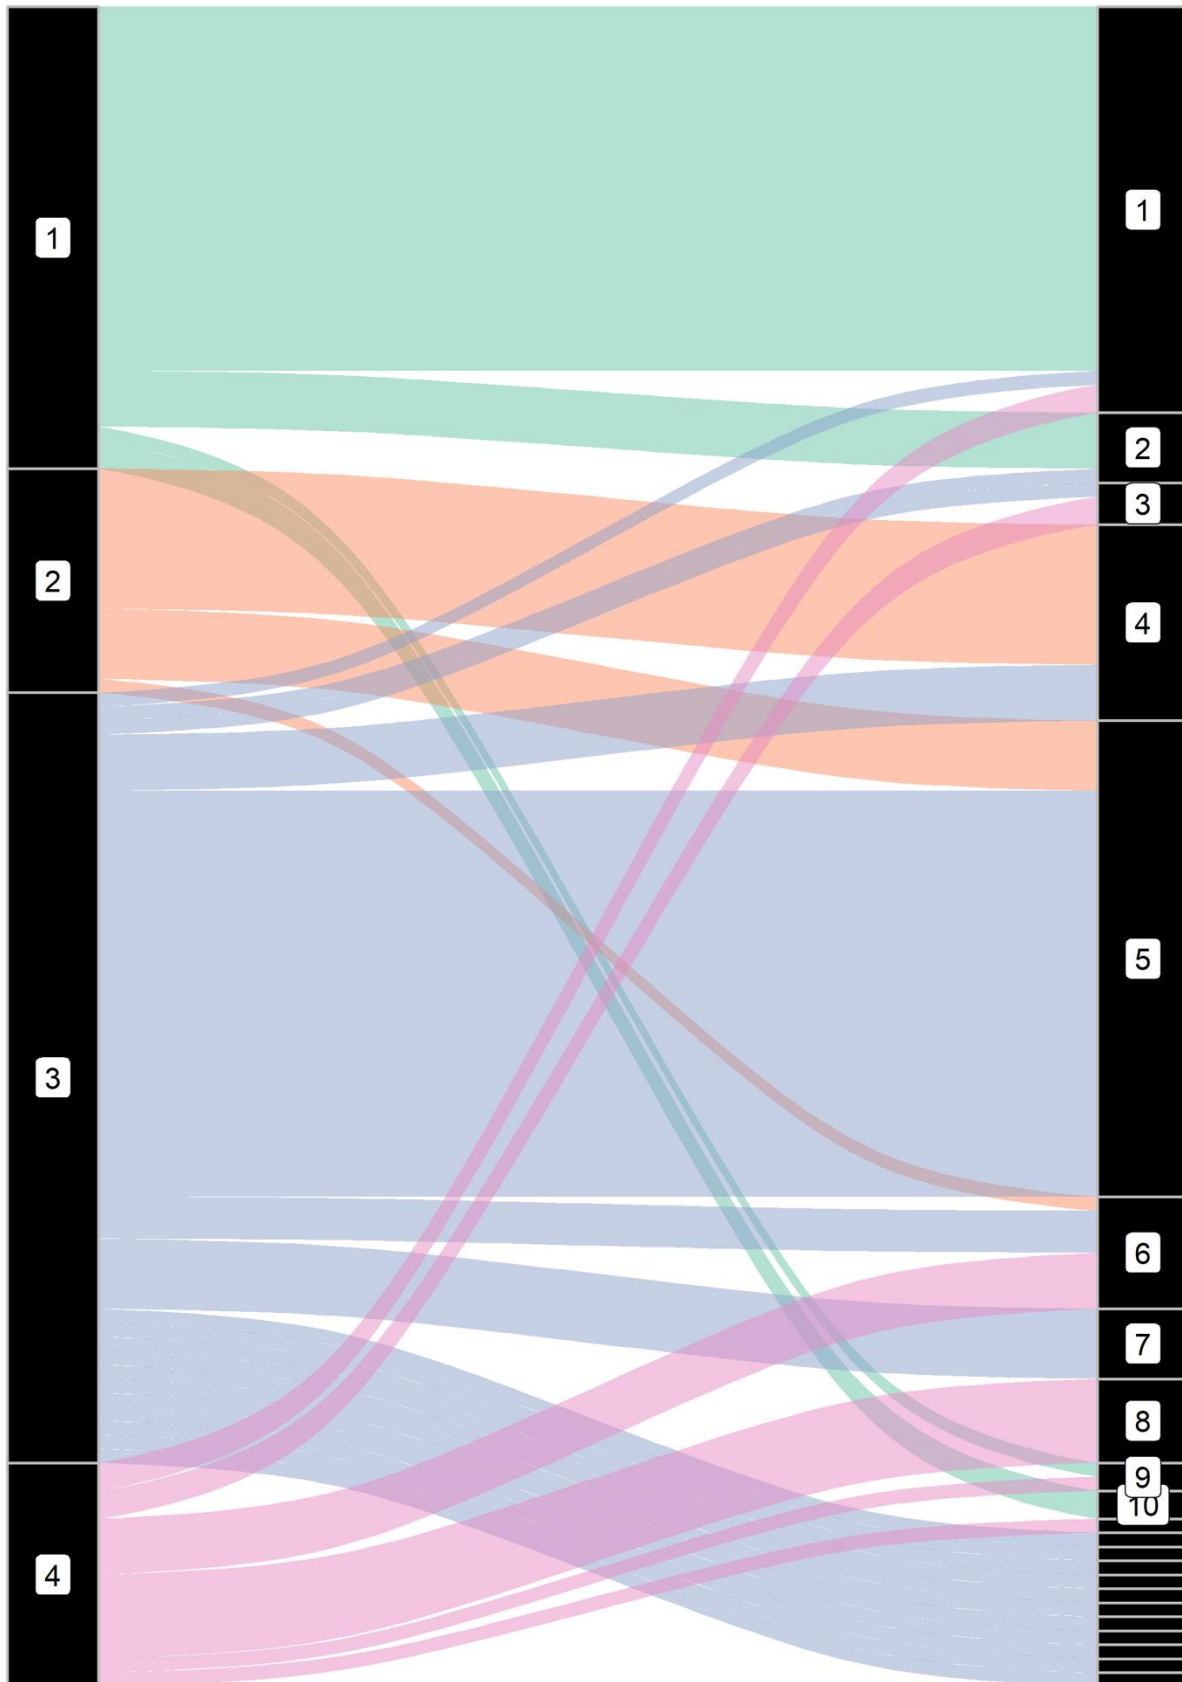

Clusters PPMI

Clusters ISING

Figure S12. Sankey showing comparison between clusters in PPMI and Ising, pramipexole.

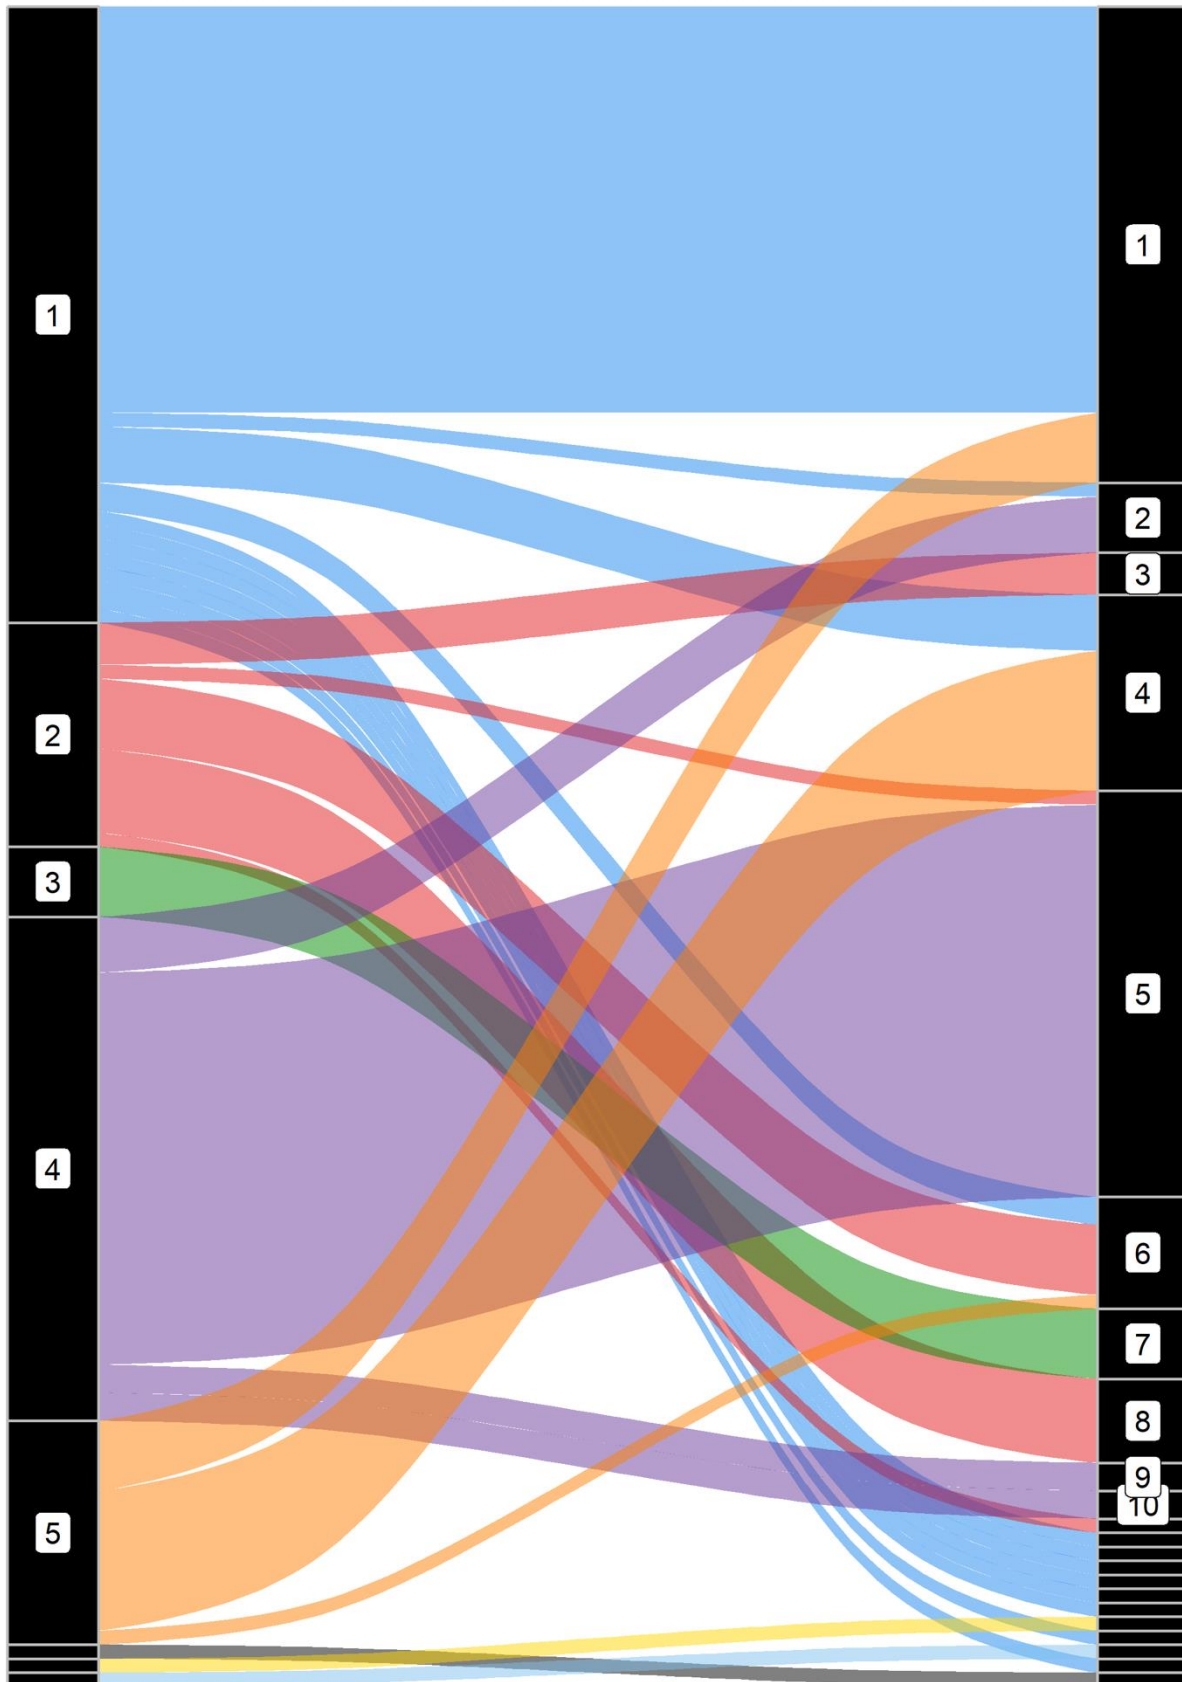

Clusters PHI

Clusters ISING

Figure S13. Sankey showing comparison between clusters in Phi and Ising, pramipexole.

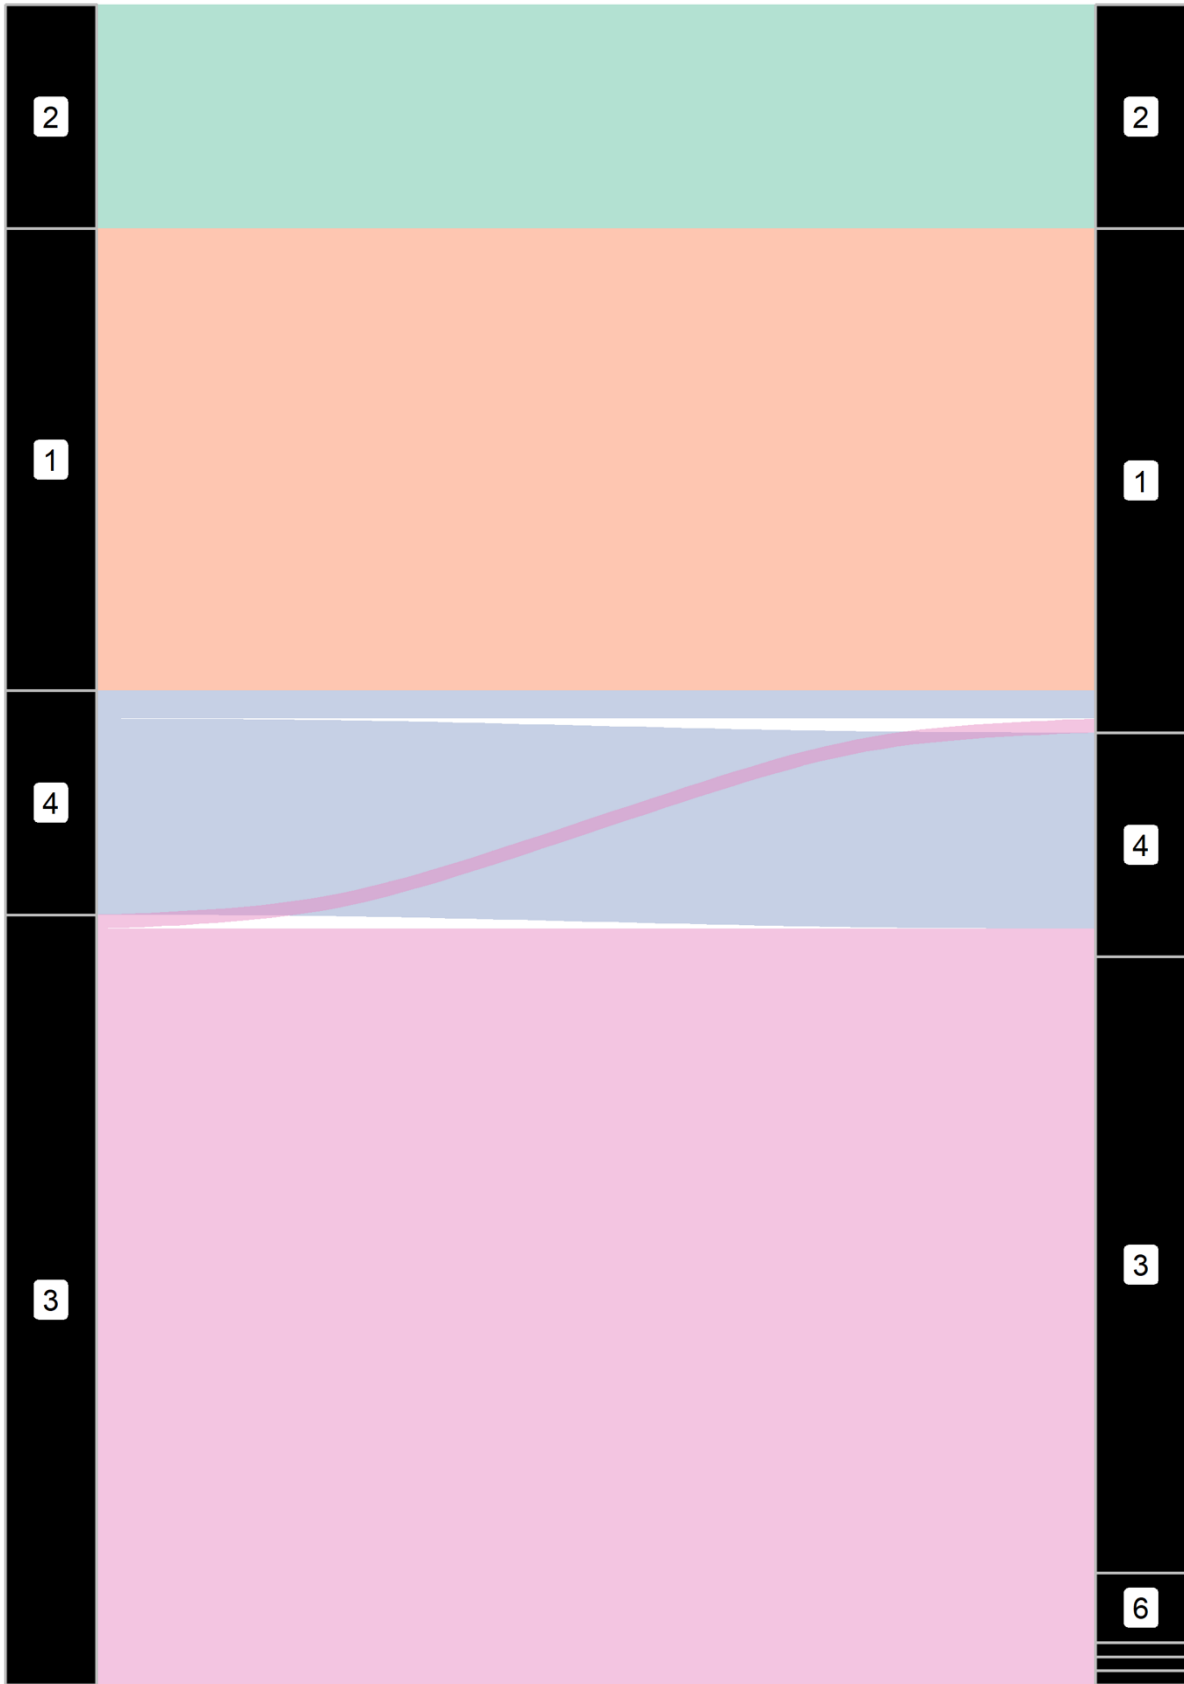

Clusters PPMI

Clusters PHI

Figure S14. Sankey showing comparison between clusters in PPMI and PHI, aripiprazole.

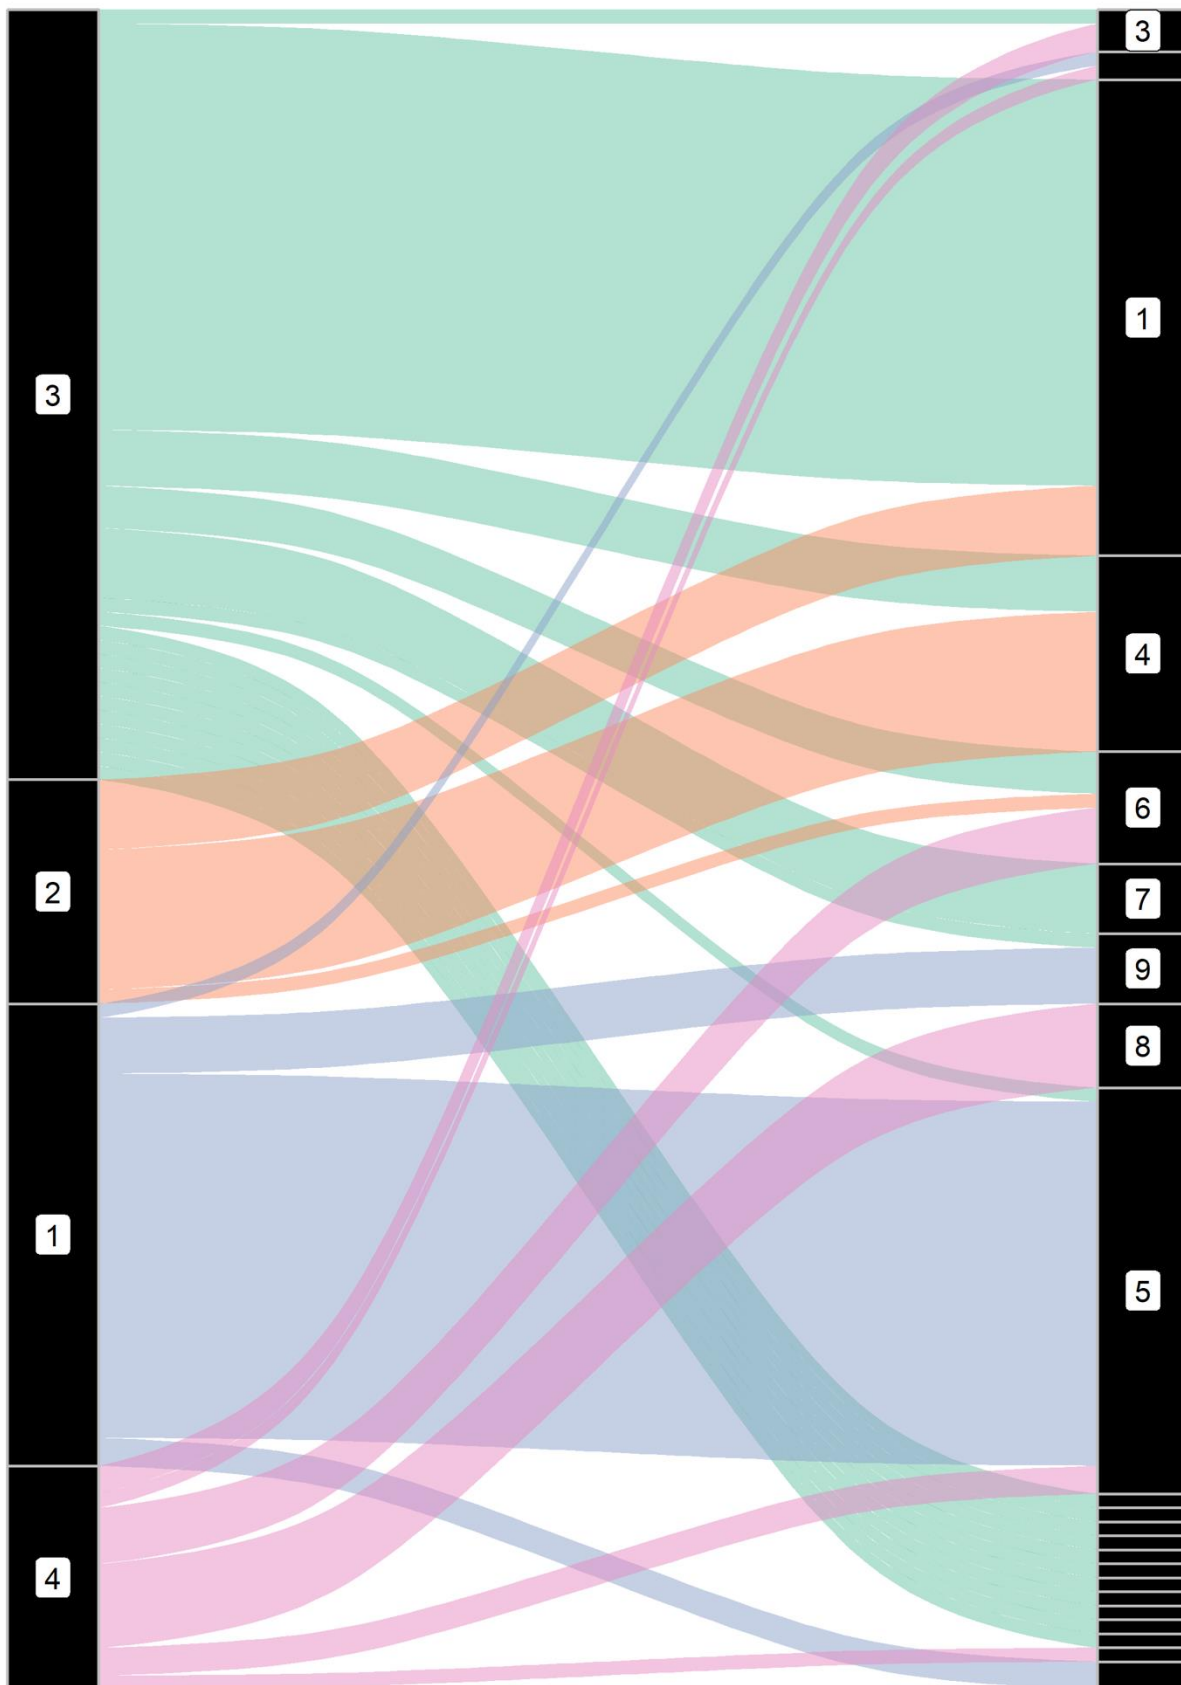

Clusters PPMI

Clusters ISING

Figure S15. Sankey showing comparison between clusters in PPMI and Ising, aripiprazole.

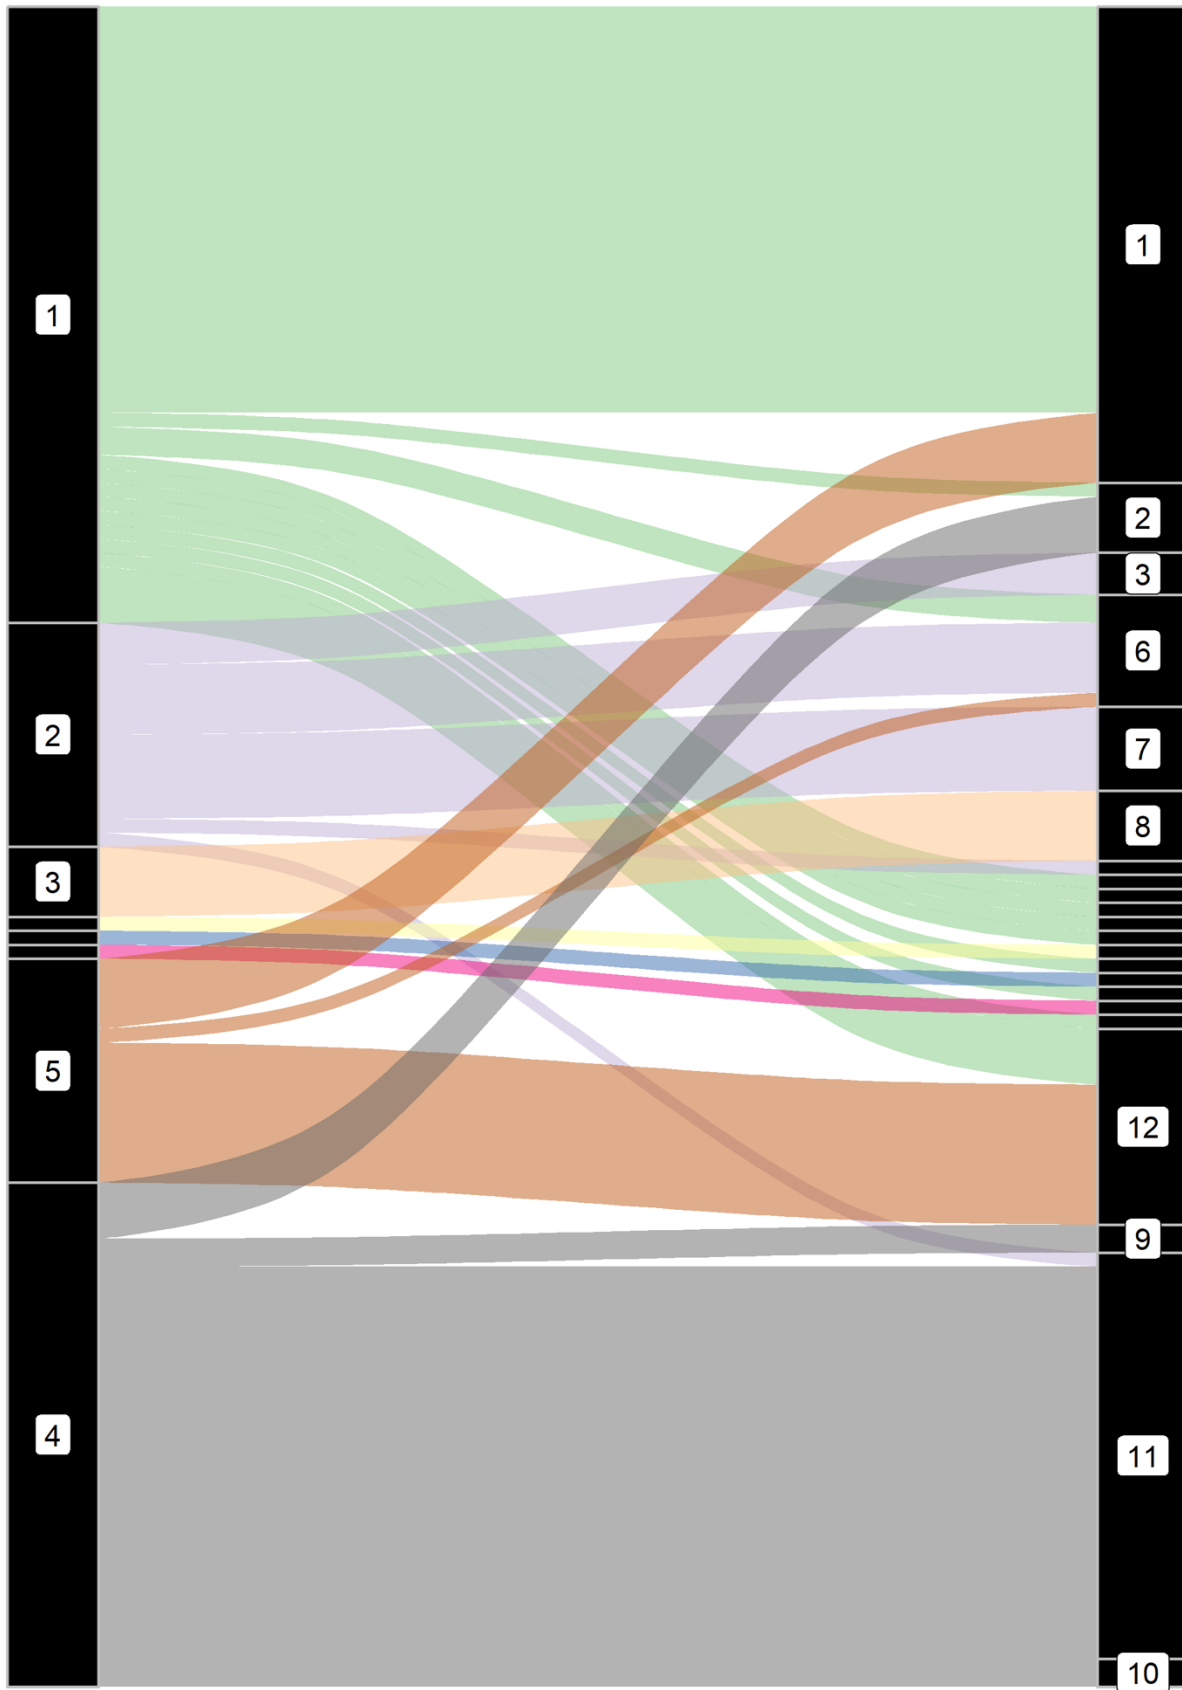

Clusters PHI

Clusters ISING

Figure S16. Sankey showing comparison between clusters in PHI and Ising, aripiprazole.
